# Supplementary material for: DAB2IP down-regulates HSP90AA1 to inhibit the malignant biological behaviors of colorectal cancer
Source: PubMed Central journal article supplement (PMC9118737; doi:10.1186/s12885-022-09596-z), 2022-05-19

**A. Full unedited blots for Fig.1k DAB2IP**

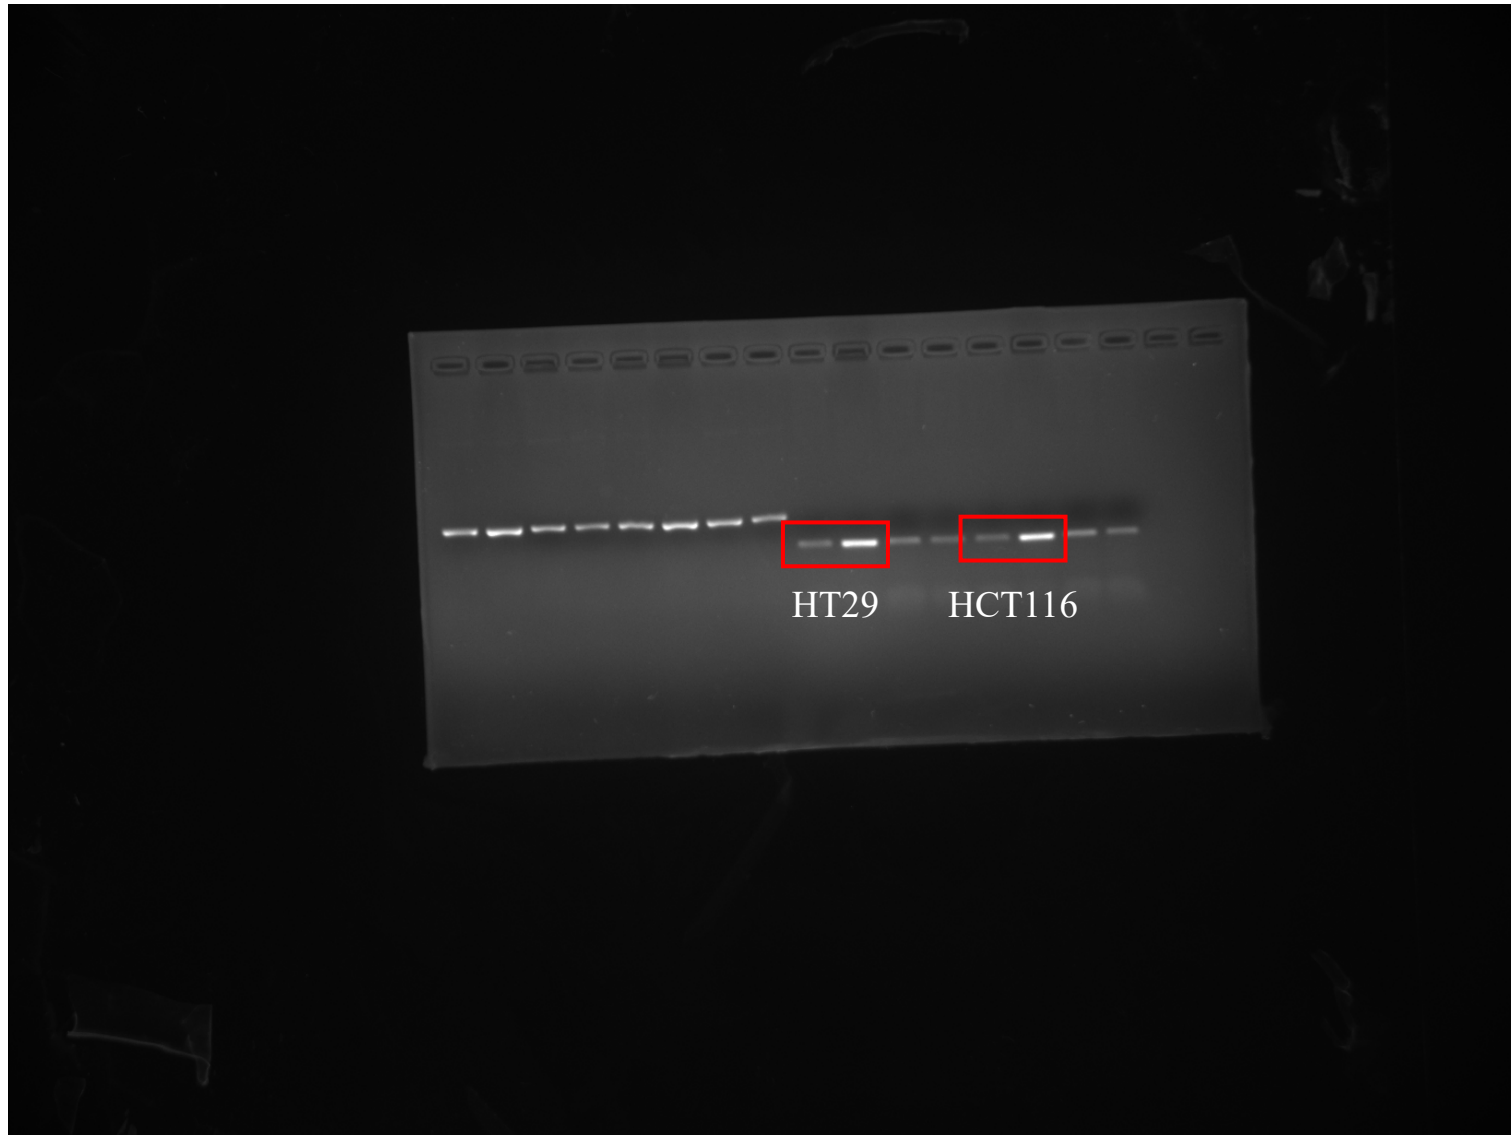

**B. Full unedited blots for Fig.1k HSP90AA1**

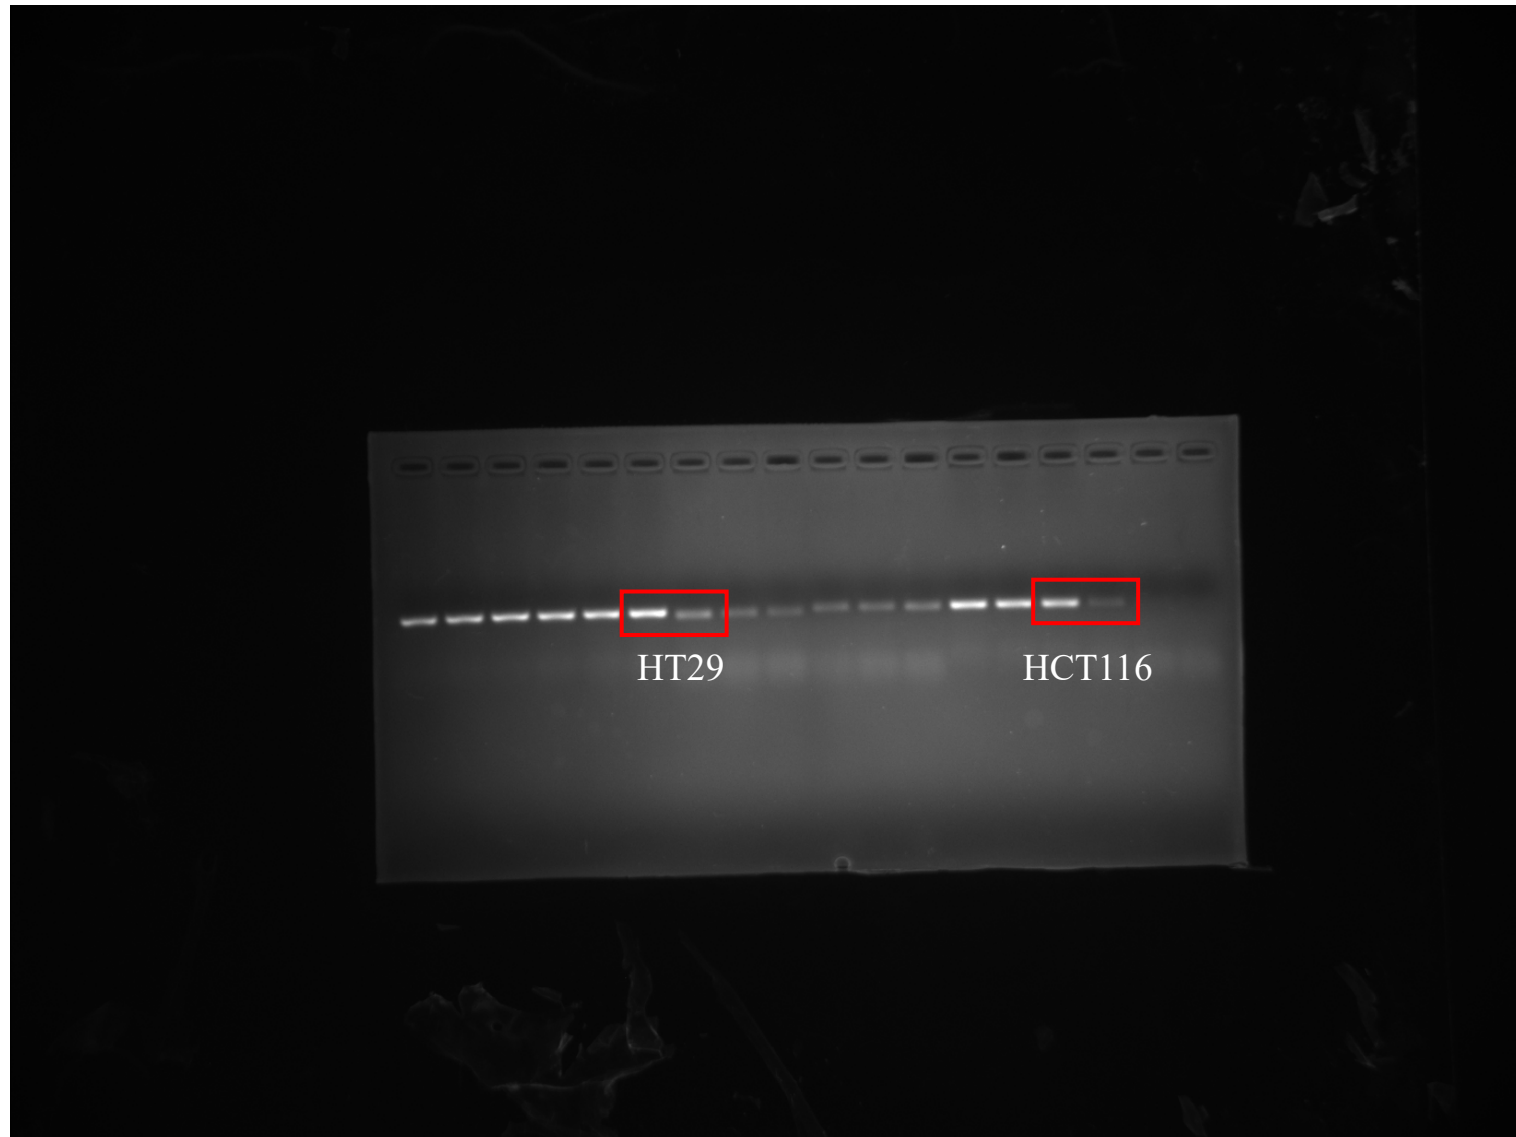

C. Full unedited blots for Fig.1k GAPDH

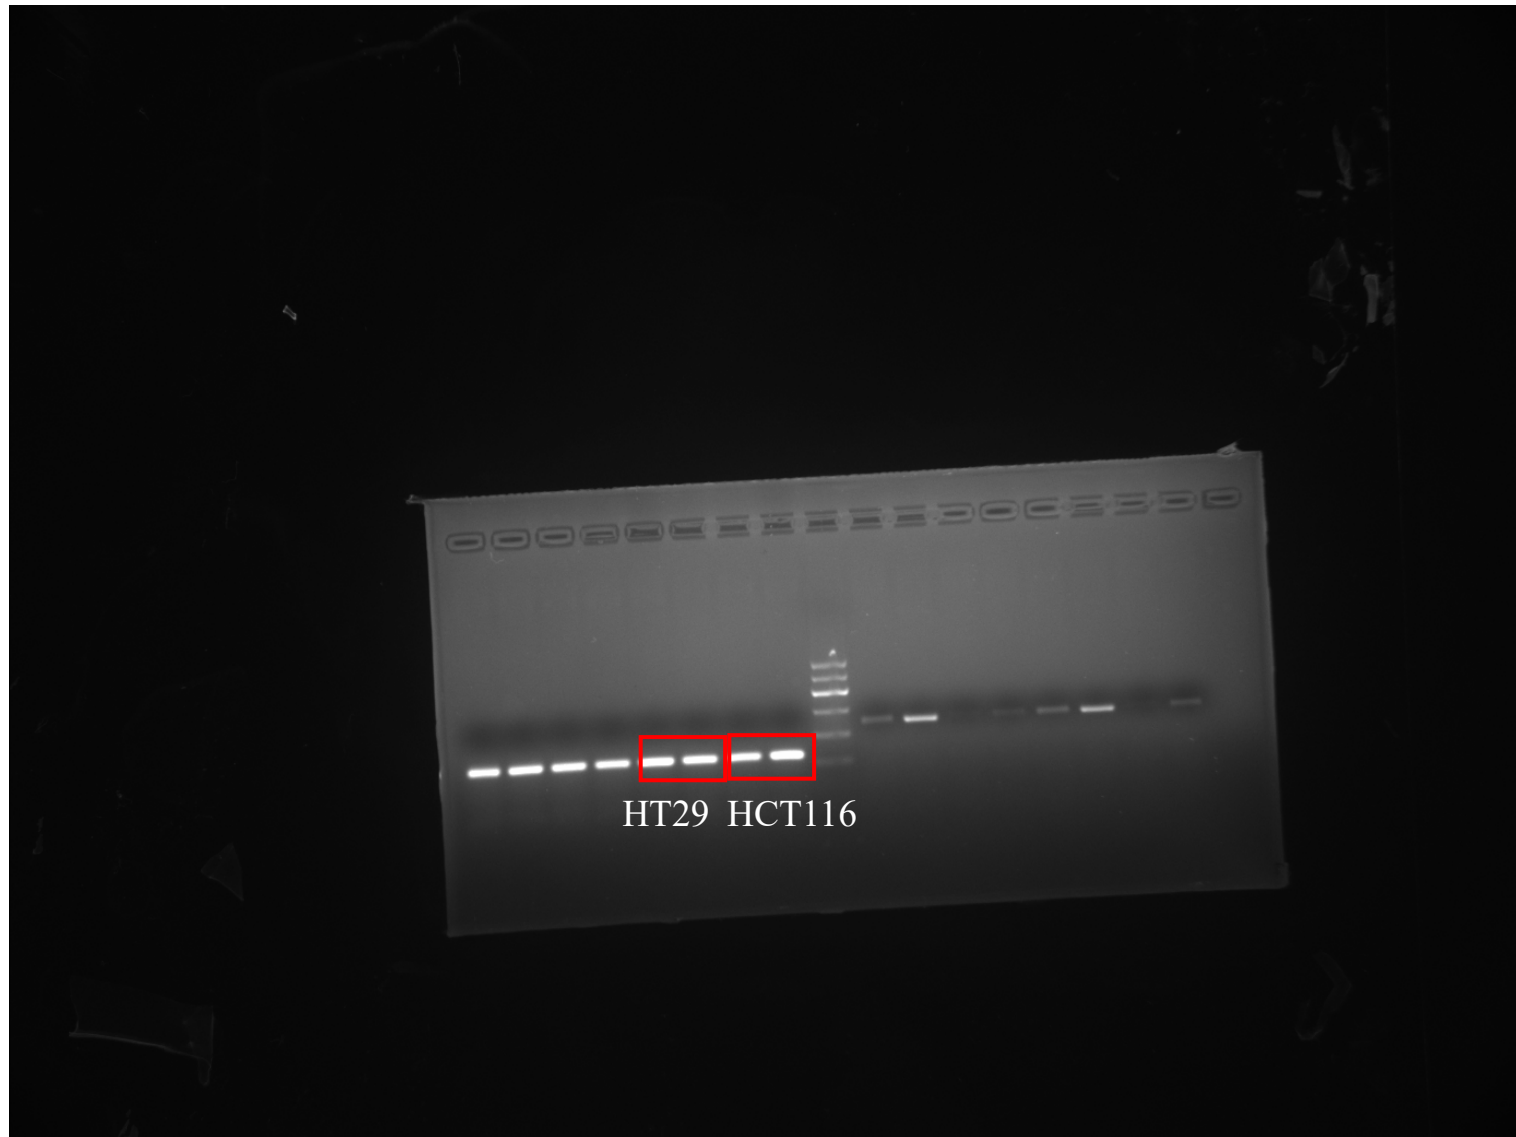

**D. Full unedited blots for Fig.1m DAB2IP**

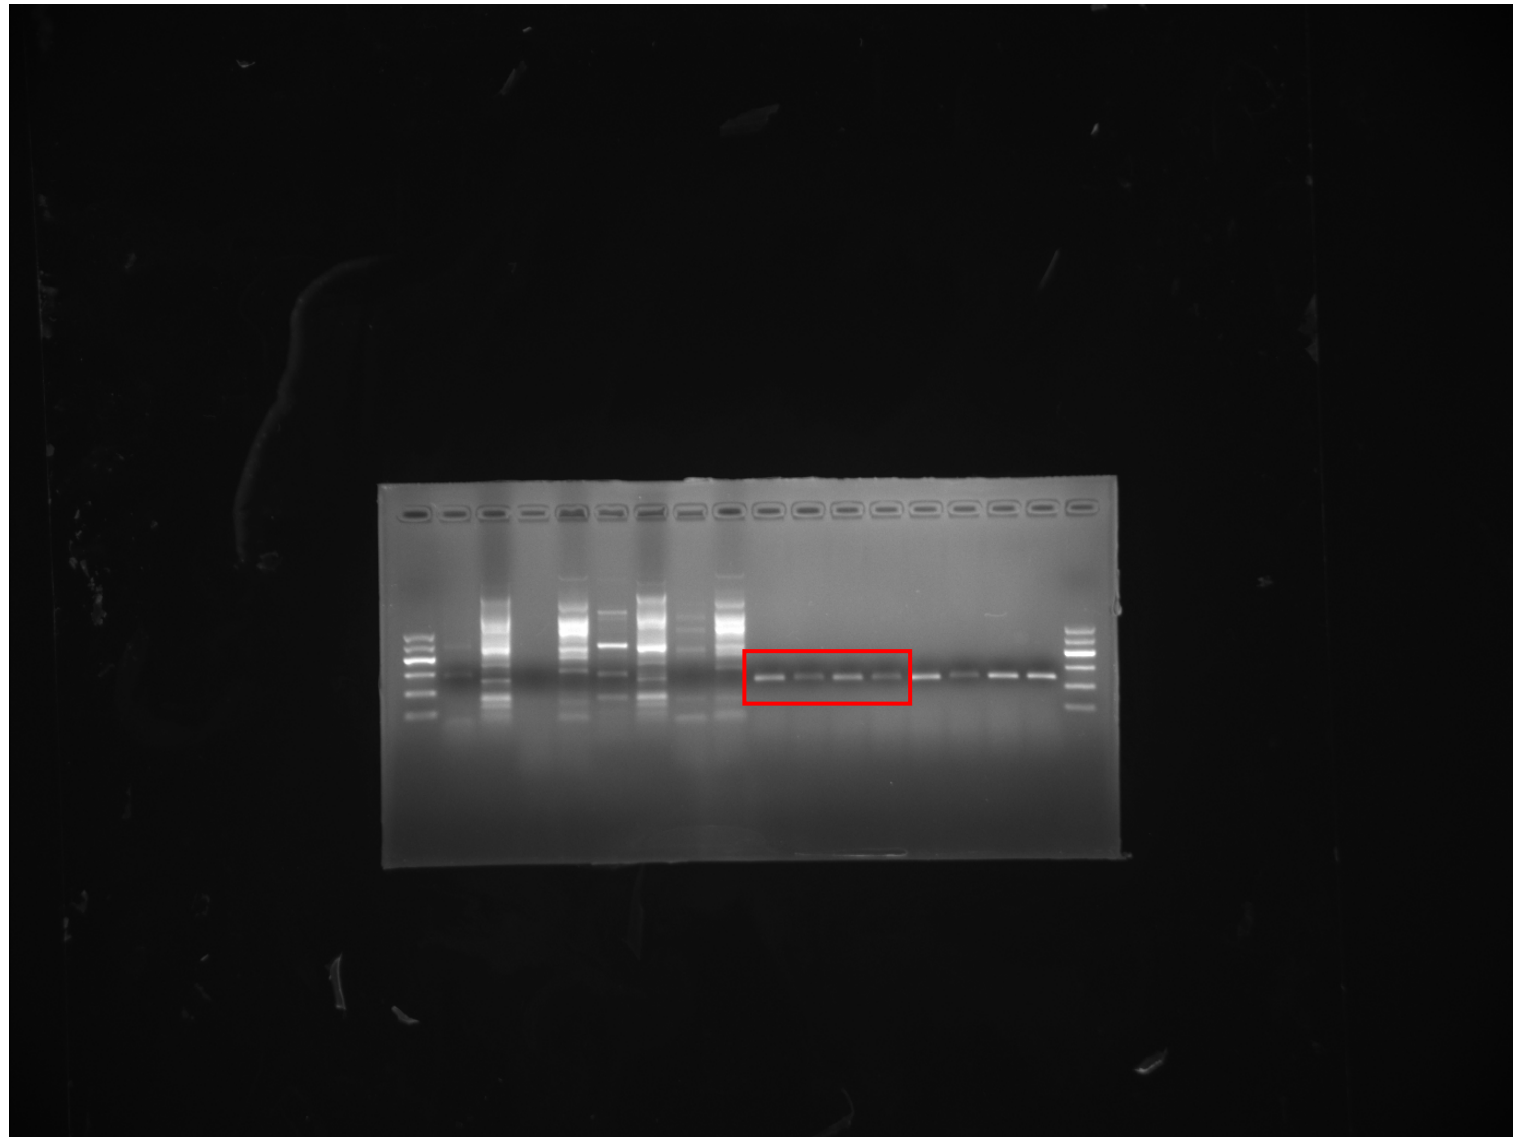

**E. Full unedited blots for Fig.1m HSP90AA1**

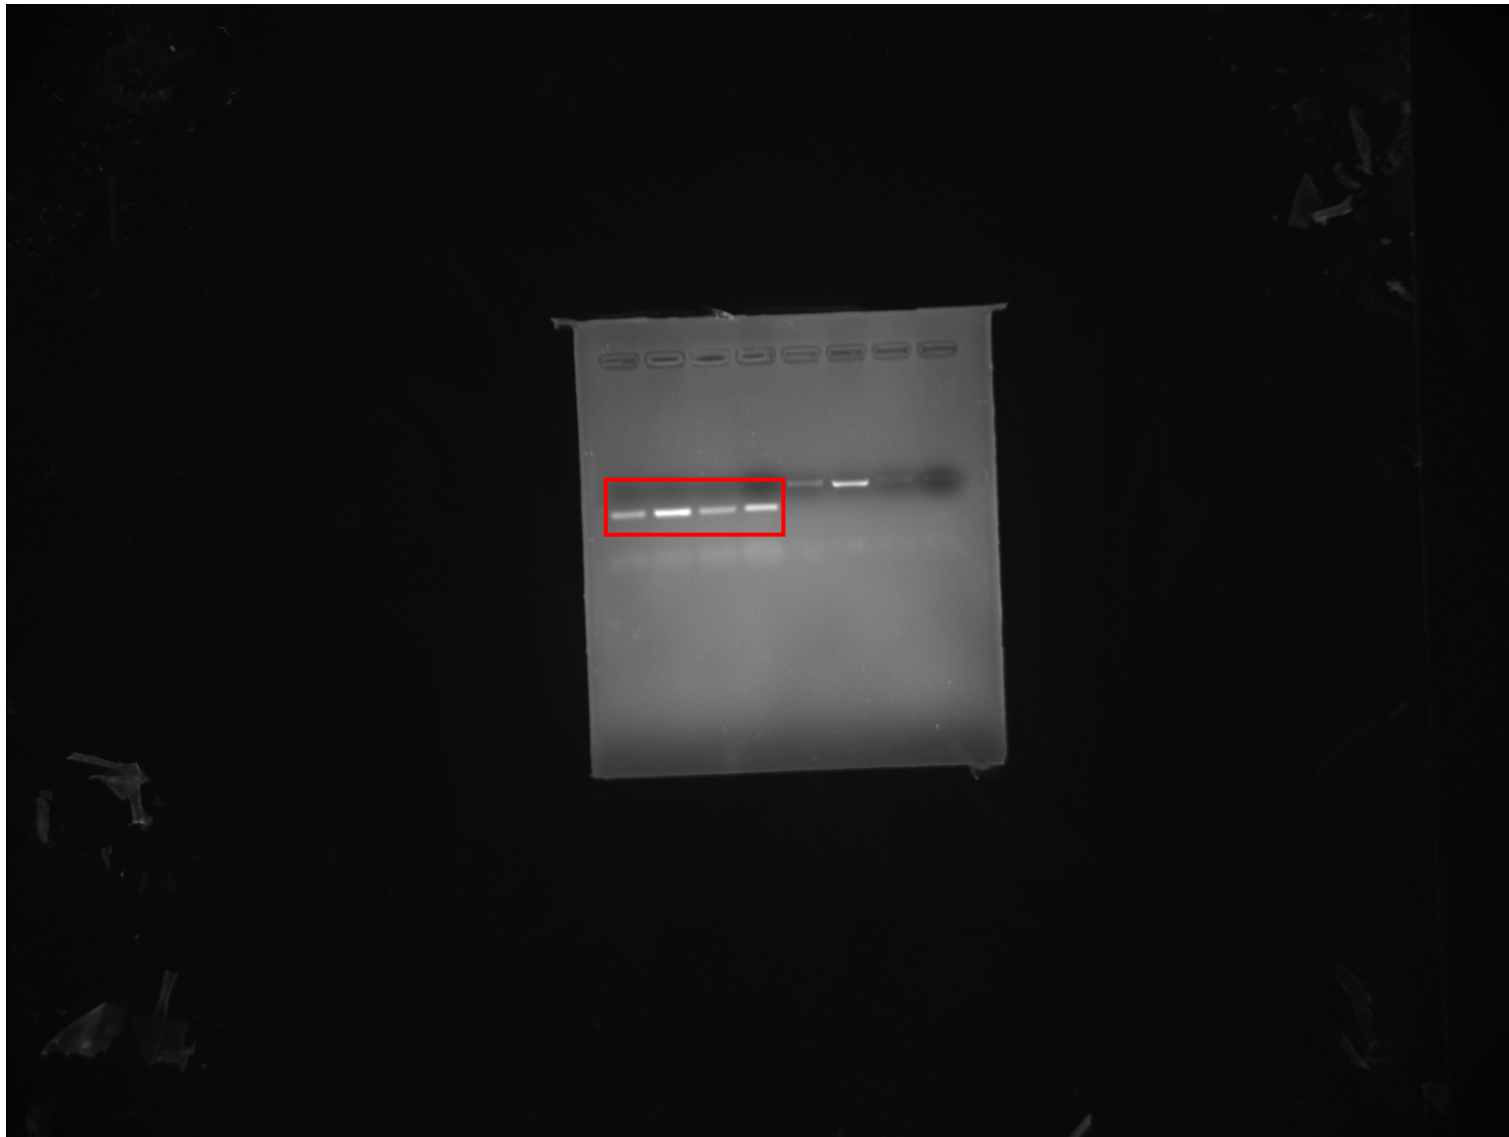

**F. Full unedited blots for Fig.1m GAPDH**

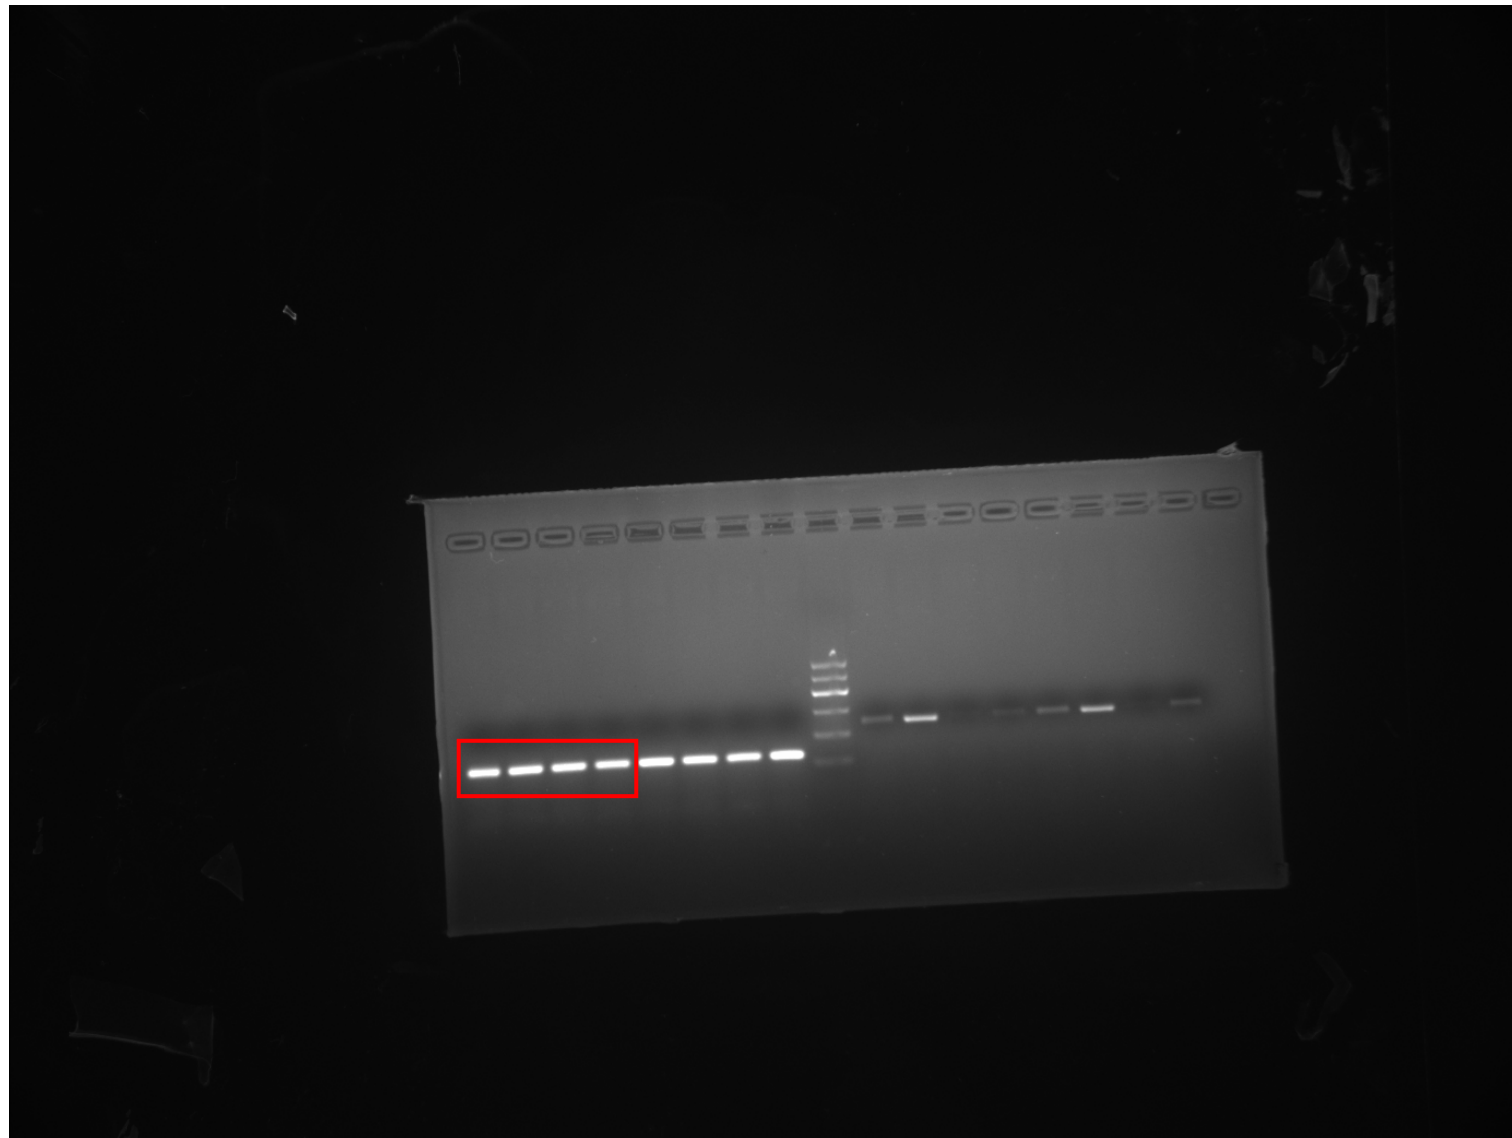

**G. Full unedited blots for Fig.4a HSP90AA1**

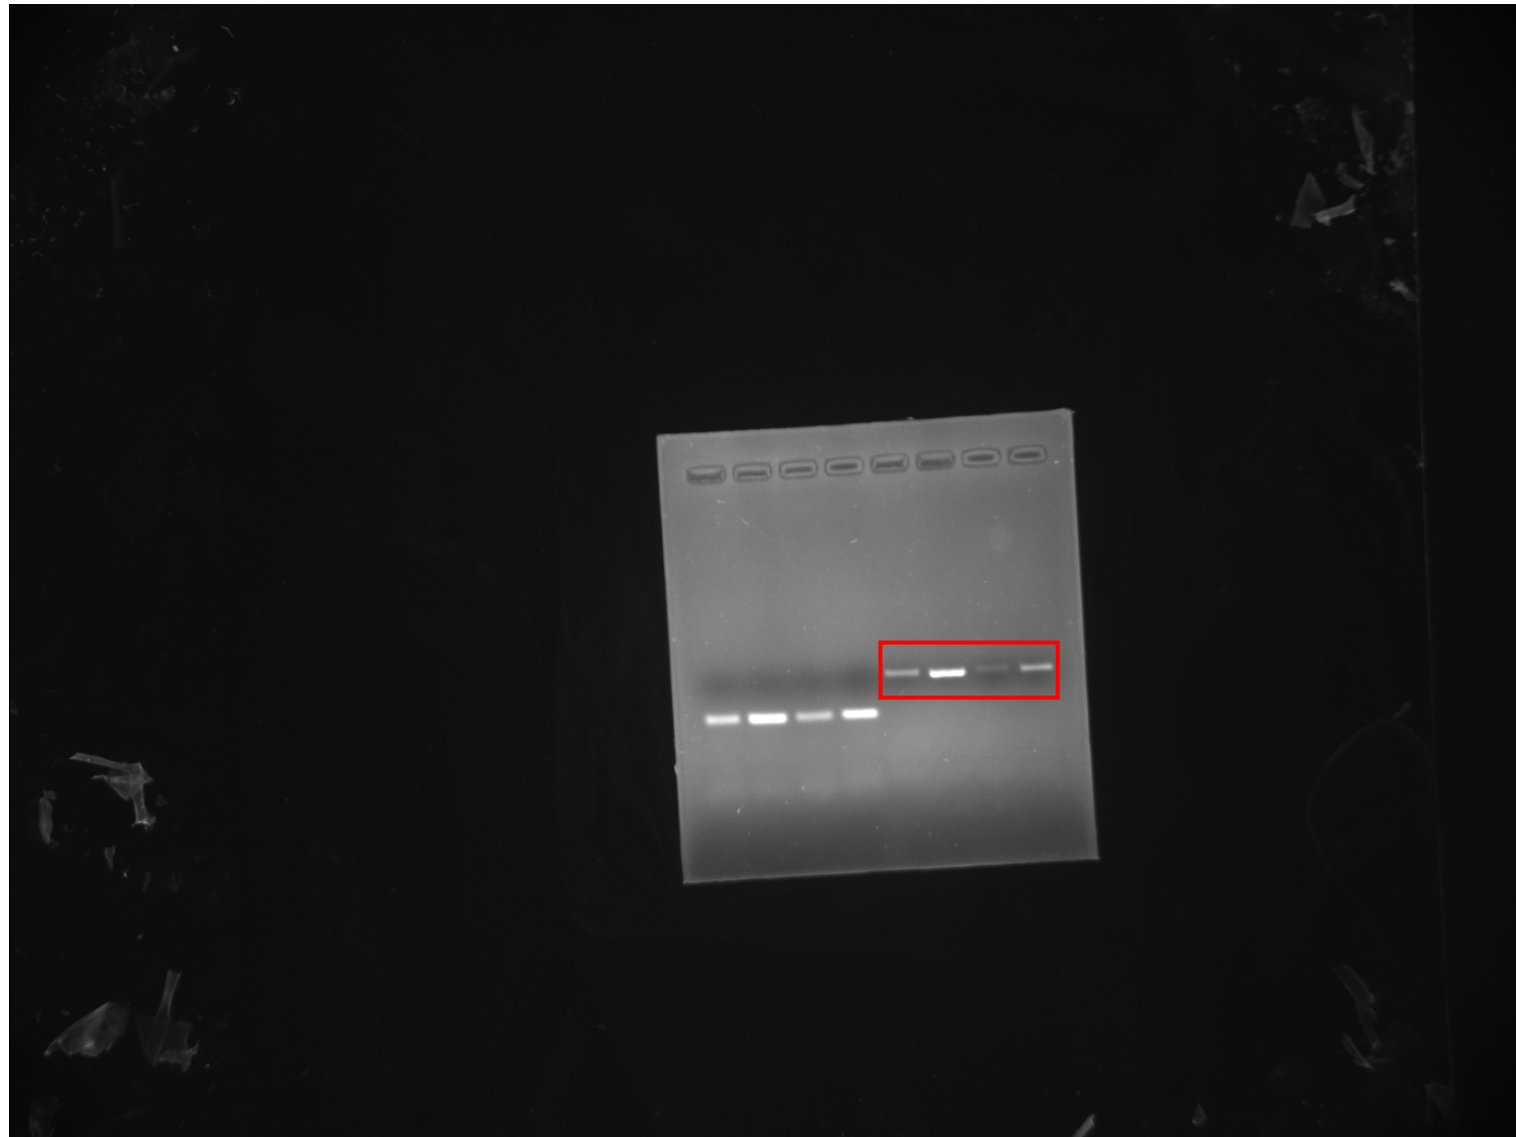

**H. Full unedited blots for Fig.4a SRP9**

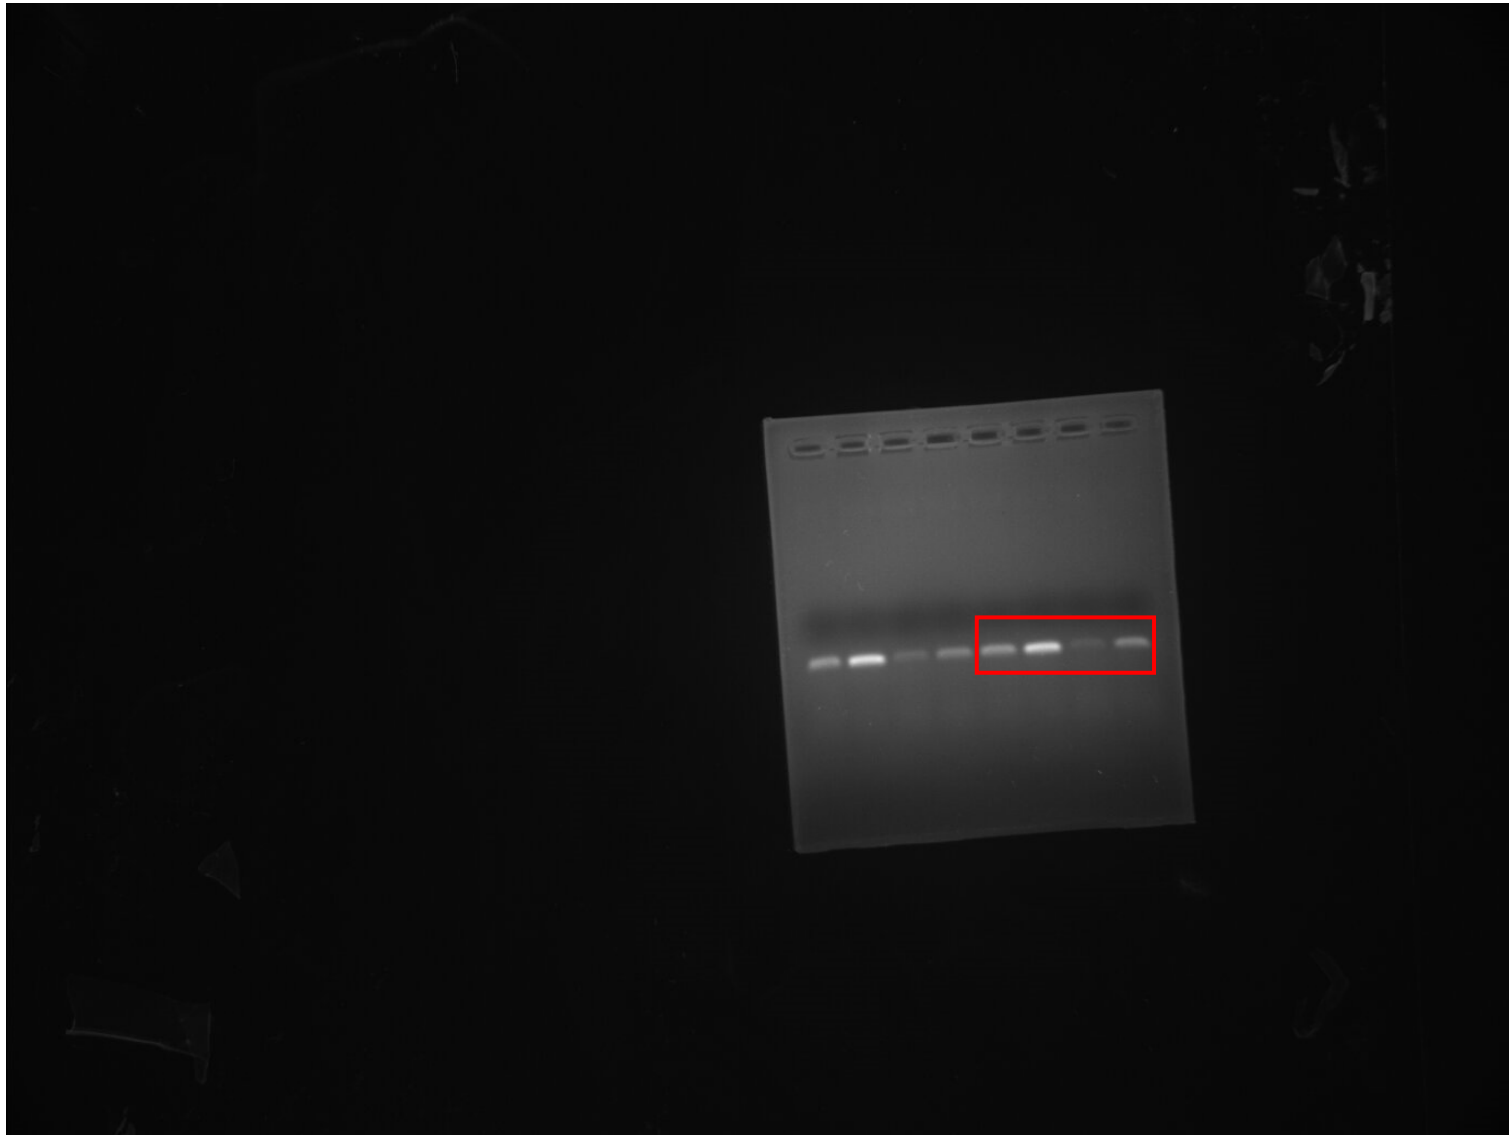



**I. Full unedited blots for Fig.4a GAPDH**

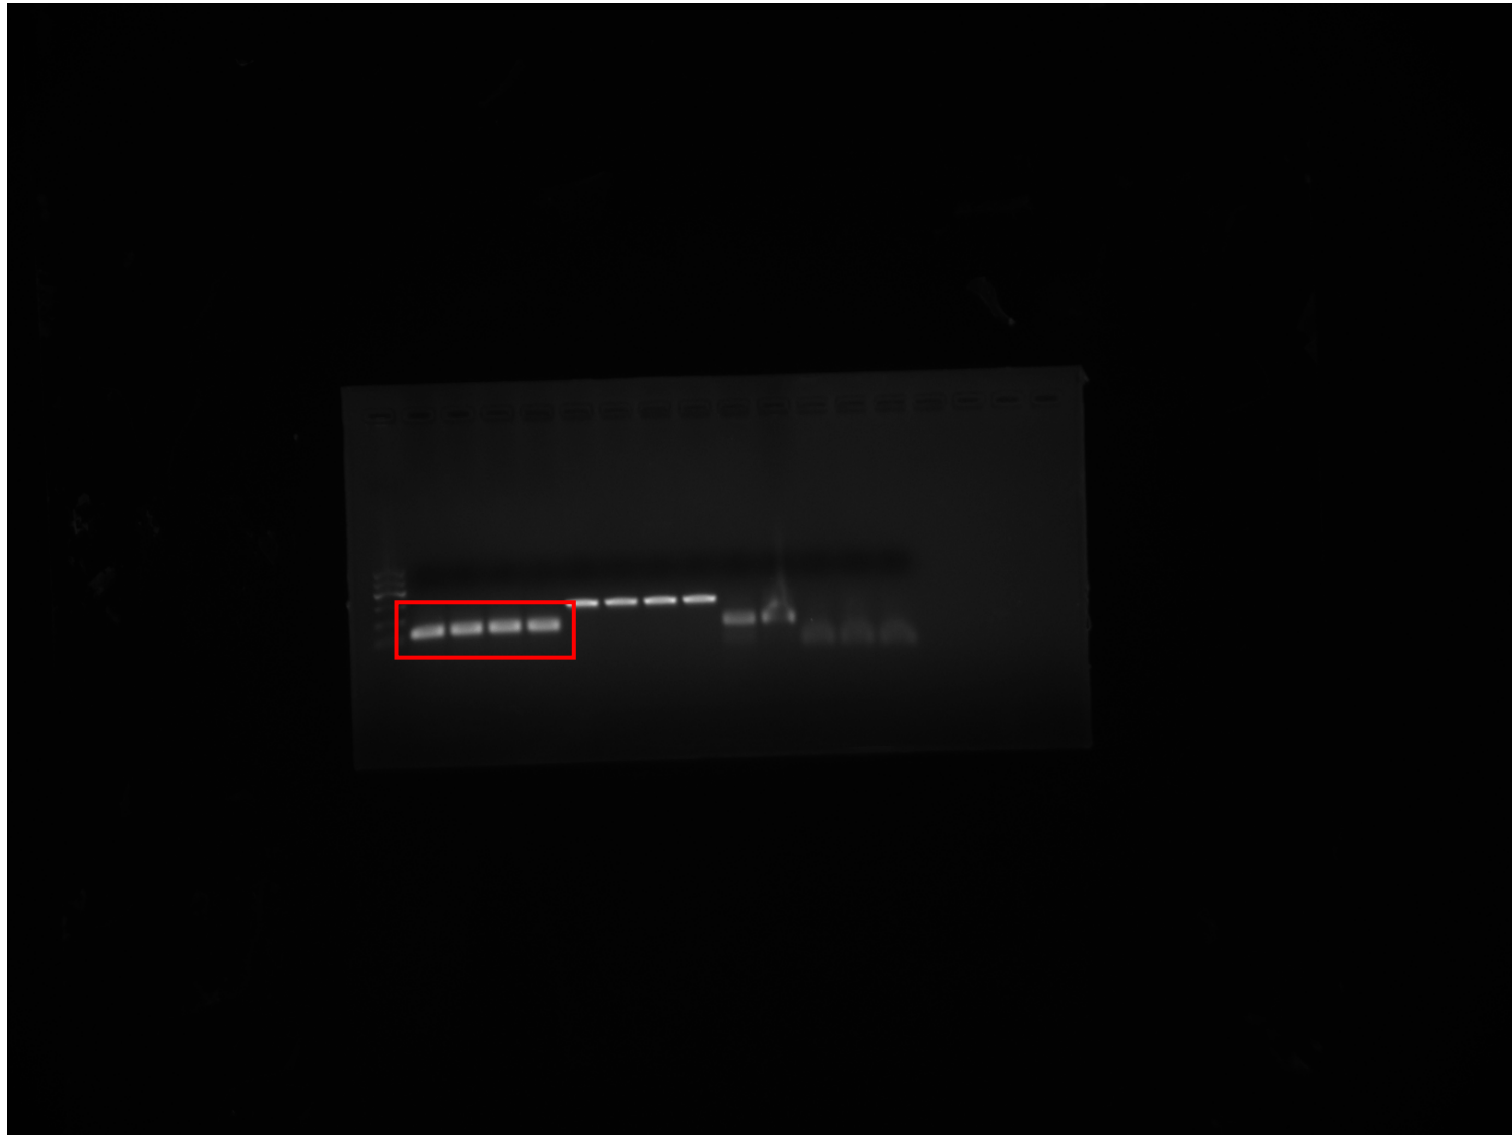

**J. Full unedited blots for Fig.4a HCT116 HSP90AA1**

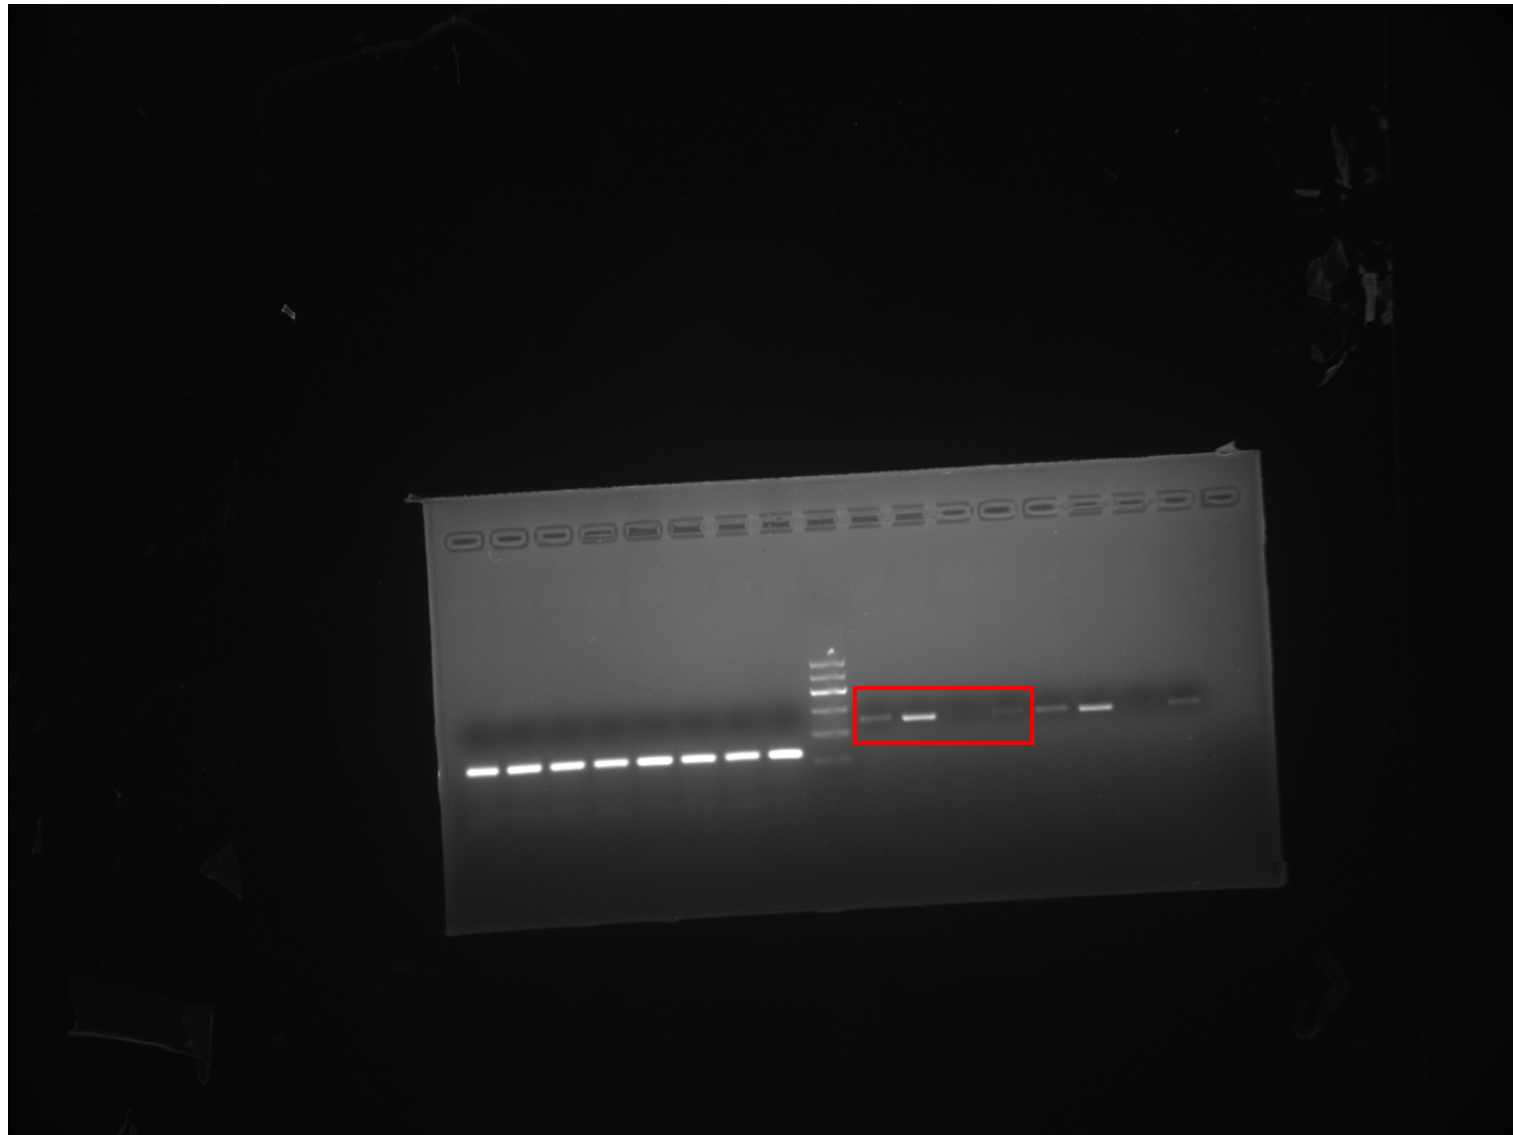

**K. Full unedited blots for Fig.4a HCT116 SRP9**

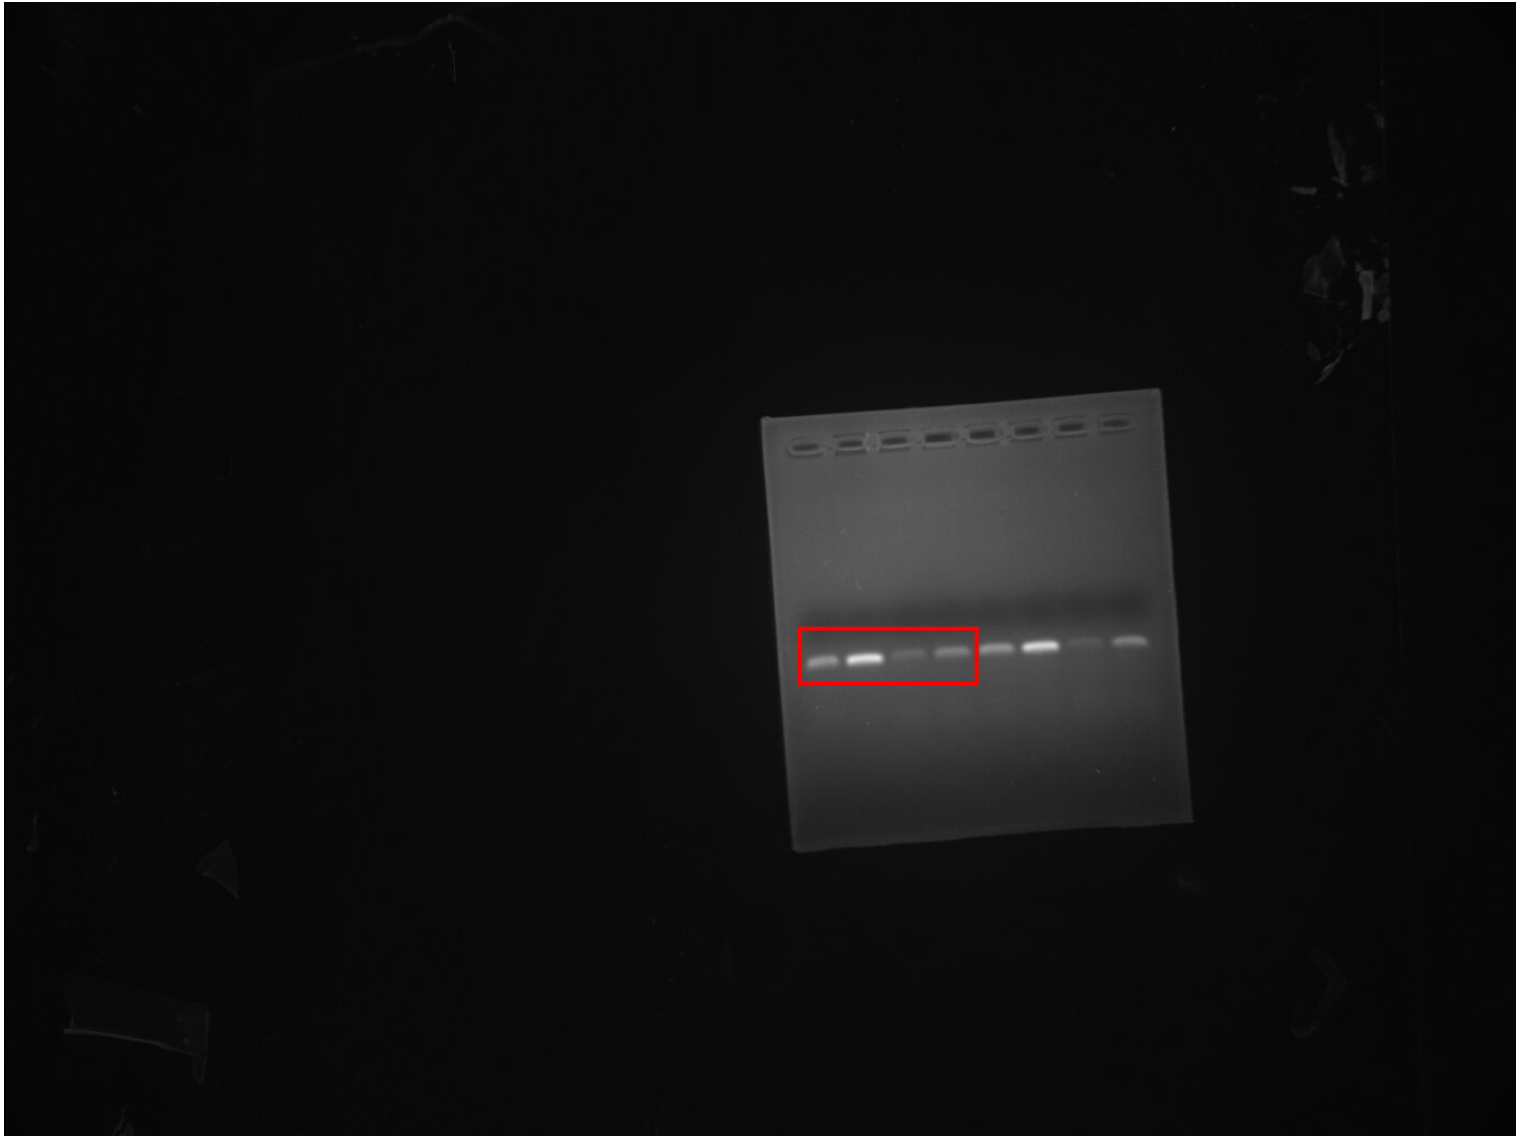

**L. Full unedited blots for Fig.4a HCT116 GAPDH**

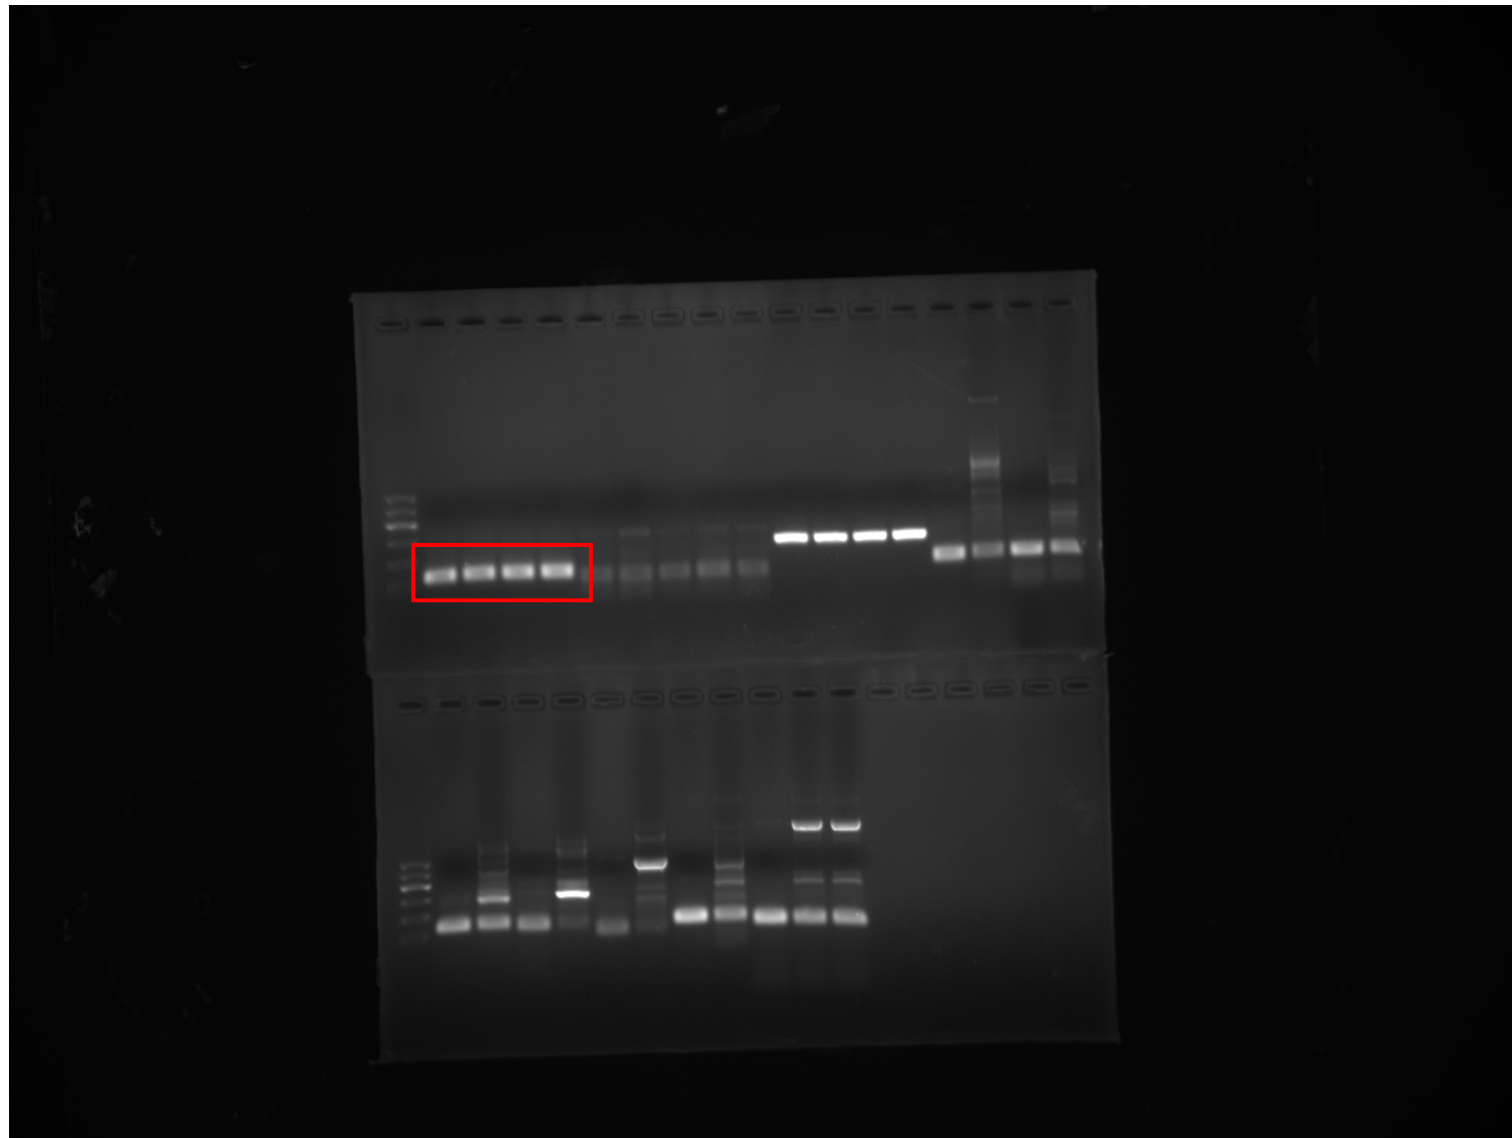

**N. Full unedited blots for Fig.S2 HSP90AA1**

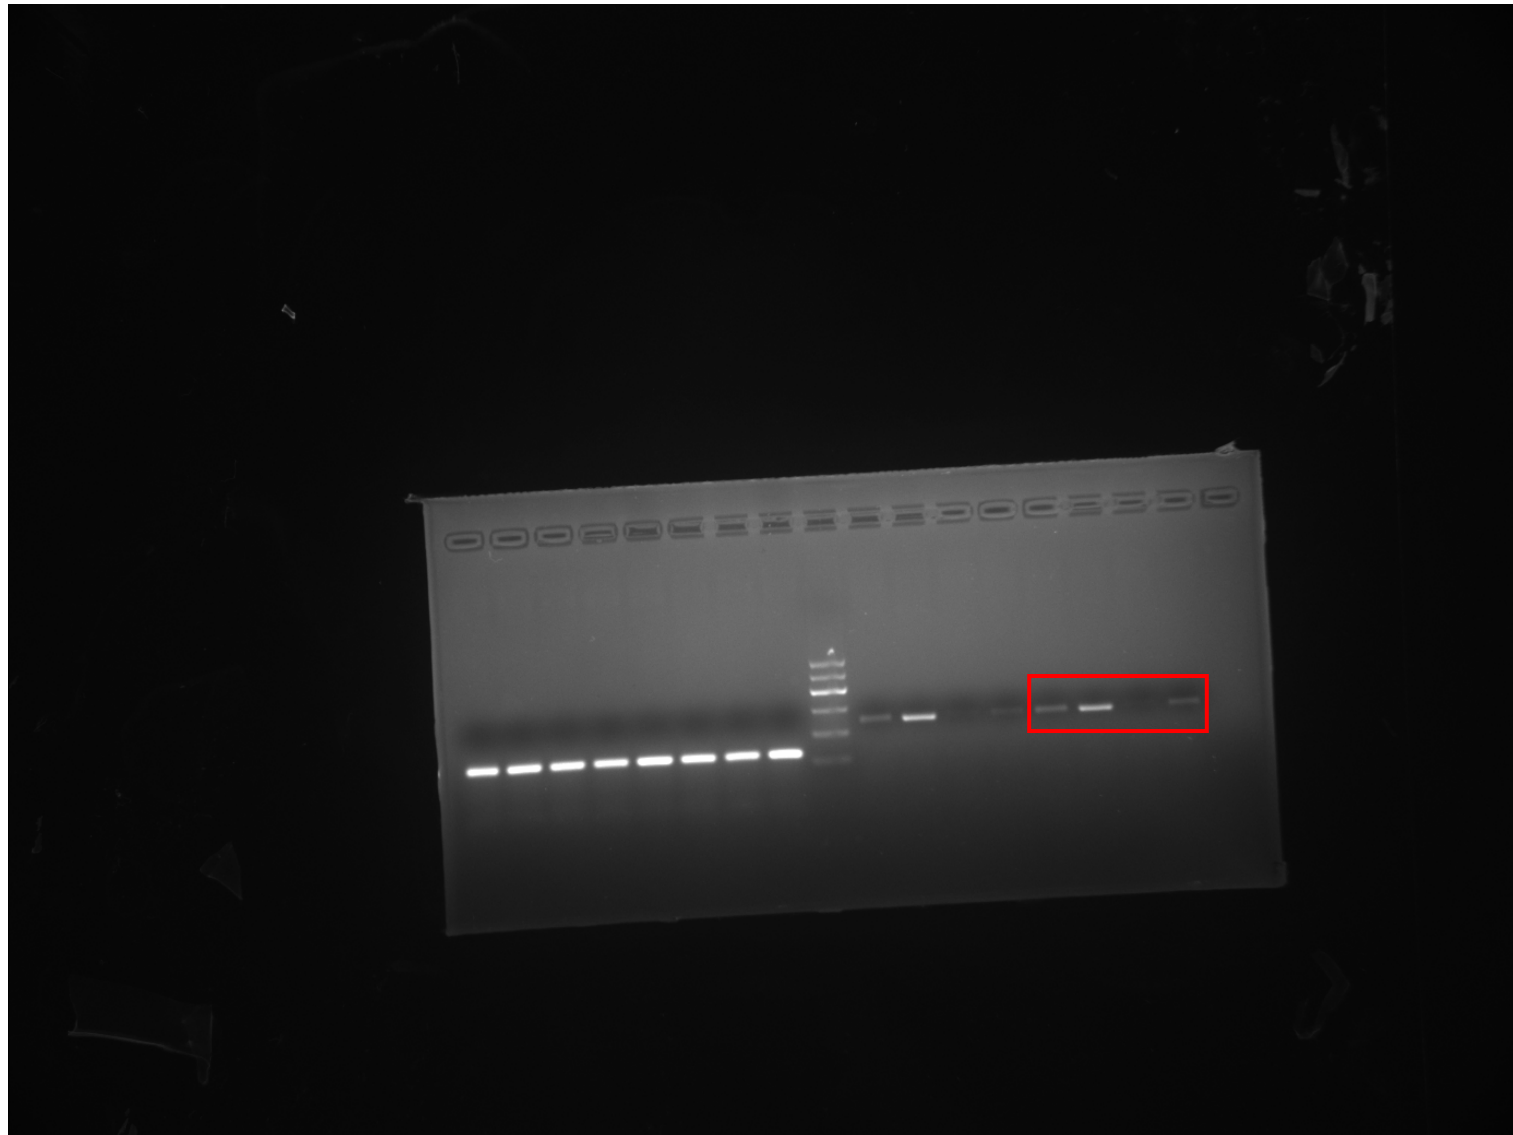

**M. Full unedited blots for Fig.S2 GAPDH**

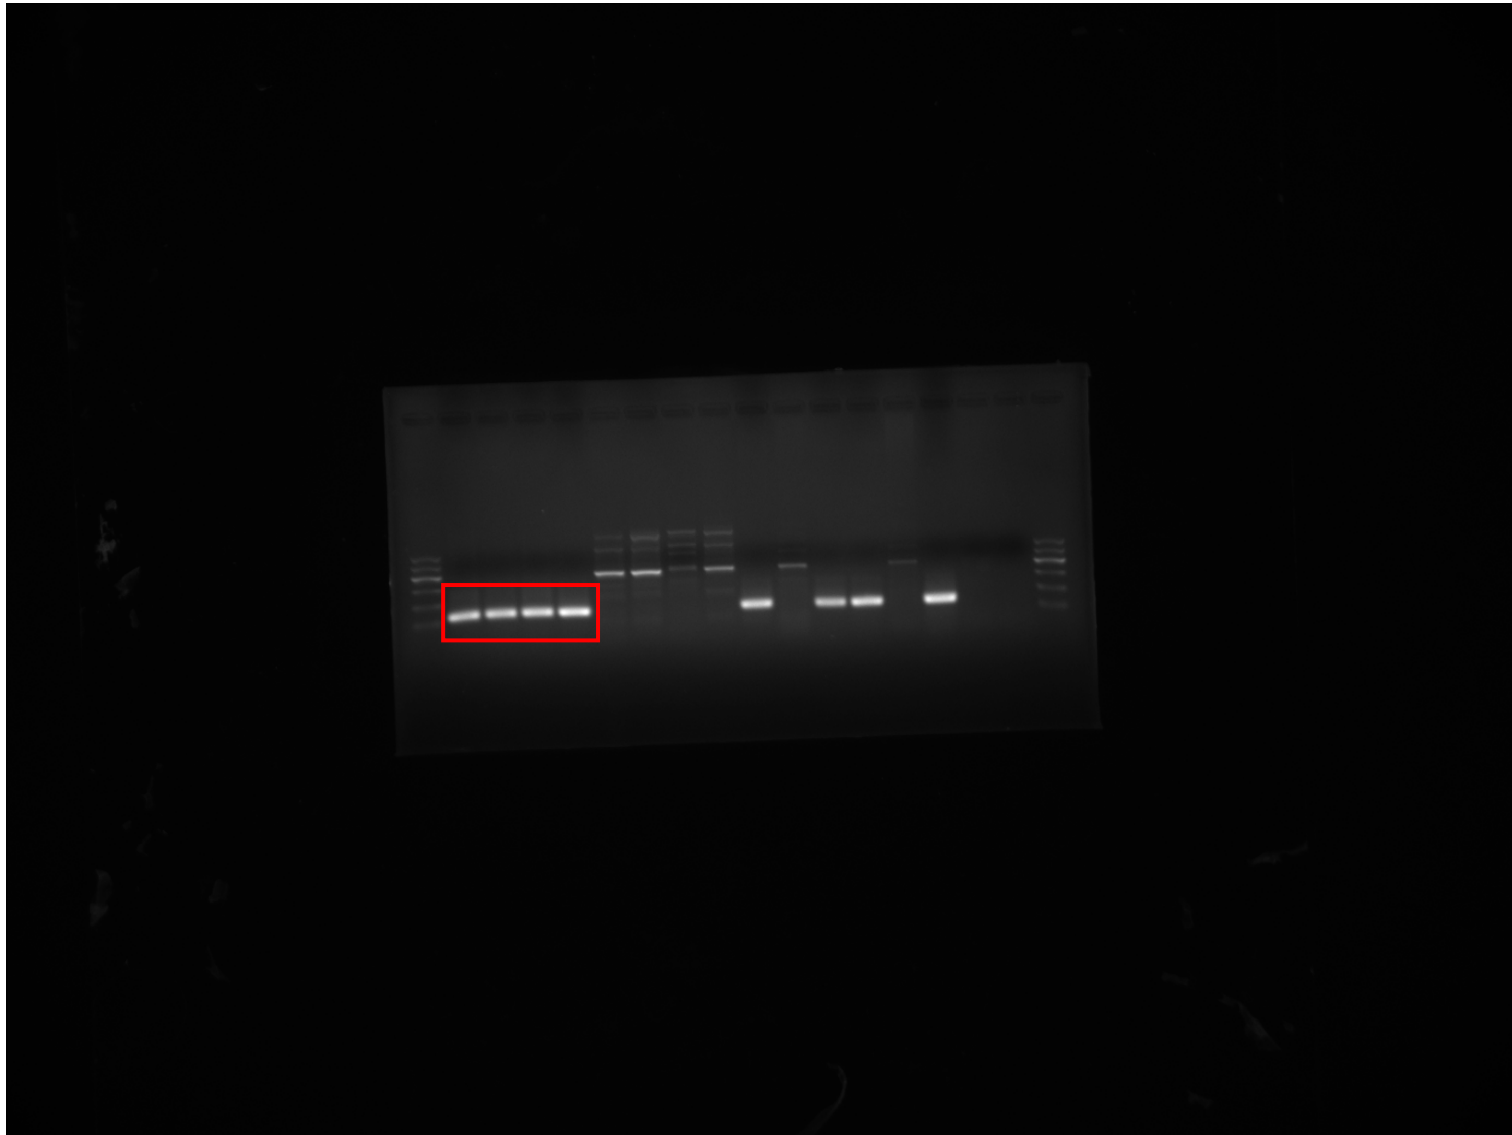

O. Full unedited blots for Fig.S5c

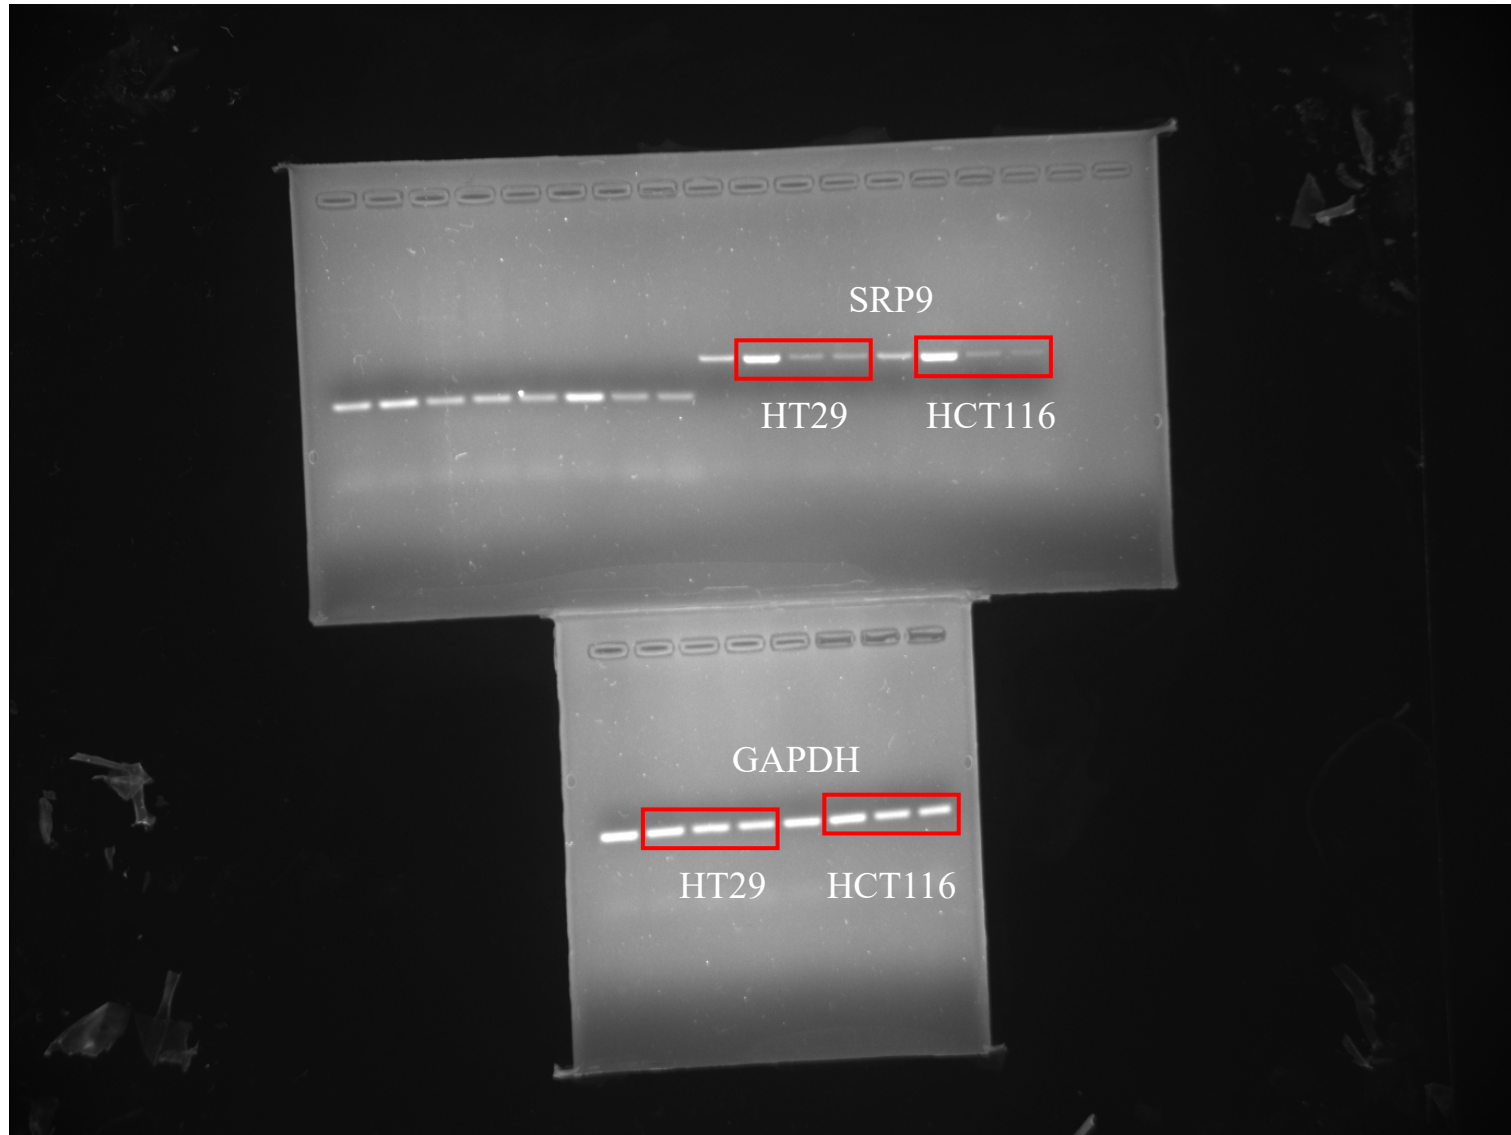

Supplement: 12885_2022_9596_MOESM3_ESM.pdf [file 12885_2022_9596_MOESM3_ESM.pdf]
