# Supplementary material for: DAB2IP down-regulates HSP90AA1 to inhibit the malignant biological behaviors of colorectal cancer
Source: PubMed Central journal article supplement (PMC9118737; doi:10.1186/s12885-022-09596-z), 2022-05-19
Supplement: 12885_2022_9596_MOESM2_ESM.pdf [file 12885_2022_9596_MOESM2_ESM.pdf]

Since our original exposure was very bright, there was no way to change it, and we could not see the film by adjusting the contrast, so we provided three strips for parallel experiments.

A detailed description of full unedited blots (Supplementary page)

Page 3. Supplementary full unedited blots of other two parallel experiments for Fig.1i high contrast blots HSP90AA1 and GAPDH

Page 5&6. Supplementary full unedited blots of other two parallel experiments for Fig.1l high contrast blots HSP90AA1(HT29 and HCT116) and GAPDH (HT29 and HCT116)

Page 8. Supplementary full unedited blots of other two parallel experiments for Fig.1n high contrast blots HSP90AA1(HT29)

Page 10. Supplementary full unedited blots of other two parallel experiments for Fig.3i high contrast blots GAPDH

Page 16&17. Supplementary full unedited blots of other two parallel experiments for Fig.5c high contrast blots BAX (HT29 and HCT116), BCL-2(HT29) and GAPDH (HT29 and HCT116)

Page 22&23. Supplementary full unedited blots of other two parallel experiments for Fig.5d high contrast blots T-JNK (HT29 and HCT116) and GAPDH (HT29 and HCT116)

Page 28&29. Supplementary full unedited blots of other two parallel experiments for Fig.5e high contrast blots BAX (HT29 and HCT116) and HSP90AA1 (HT29 and HCT116)

Page 34&35&36. Supplementary full unedited blots of other two parallel experiments for Fig.5f high contrast blots p-JNK (HT29 and HCT116), BAX (HT29 and HCT116) and GAPDH (HT29 and HCT116)

Page 41&42&43. Supplementary full unedited blots of other two parallel experiments for Fig. 5g (si#1) high contrast blots SRP9(HT29 and HCT116), BAX (HT29 and HCT116) and GAPDH (HT29 and HCT116)

Page 48. Supplementary full unedited blots of other two parallel experiments for Fig. 5g (si#2) high contrast blots p-ASK1(HCT116) and GAPDH (HT29 and HCT116)

Page 53&54. Supplementary full unedited blots of other two parallel experiments for Fig.5h high contrast blots T-JNK (HT29 and HCT116) and GAPDH (HT29 and HCT116)

Page 58. Supplementary full unedited blots of other two parallel experiments for Fig. S2 high contrast blots HSP90AA1 and GAPDH

Page 62. Supplementary full unedited blots of other two parallel experiments for Fig. S2 high contrast blots HSP90AA1 (HT29 and HCT116) and SRP9 (HCT116)

**A. Full unedited blots for Fig.1i**

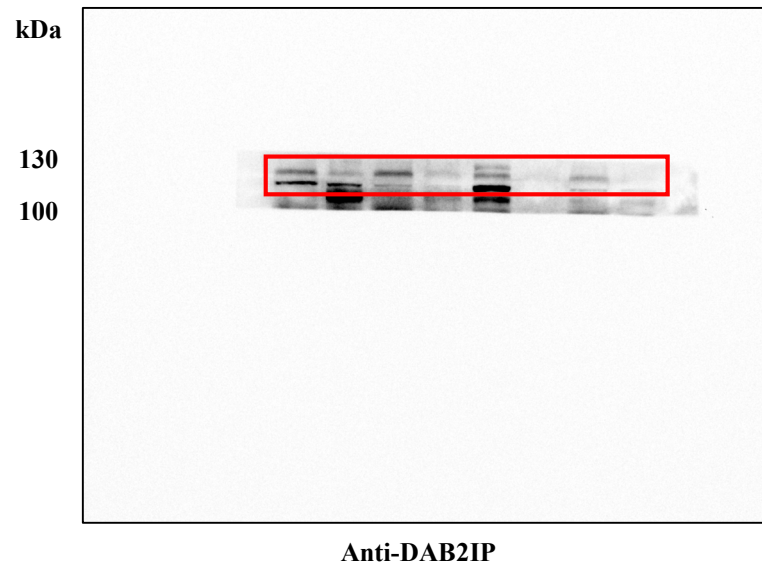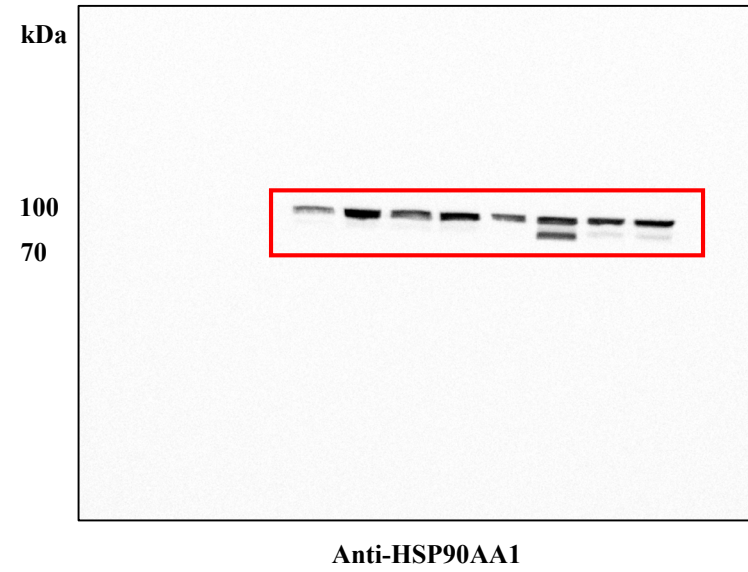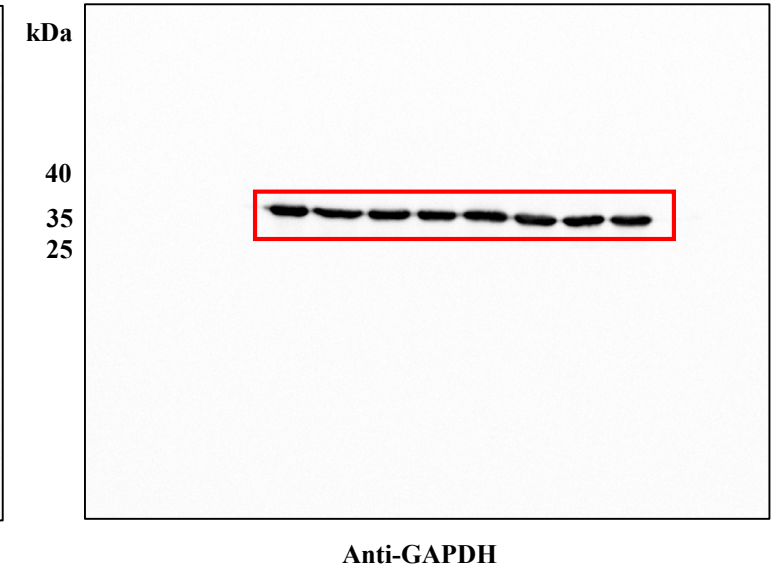

**Sup A. Full unedited blots for Fig.1i**

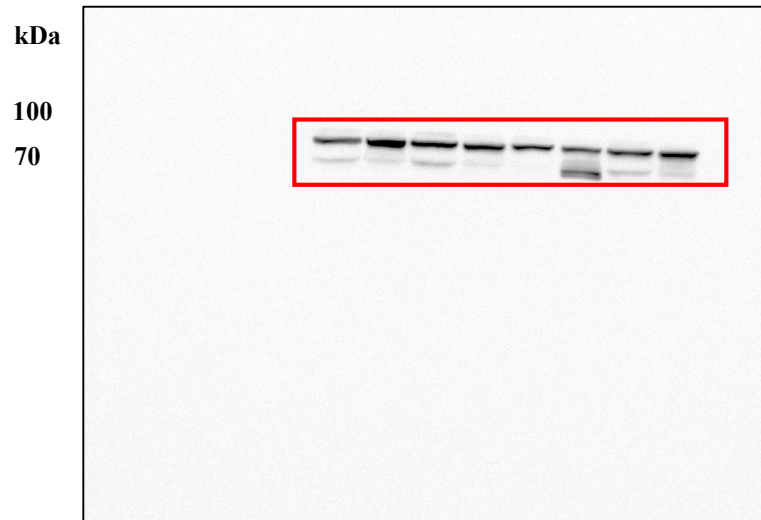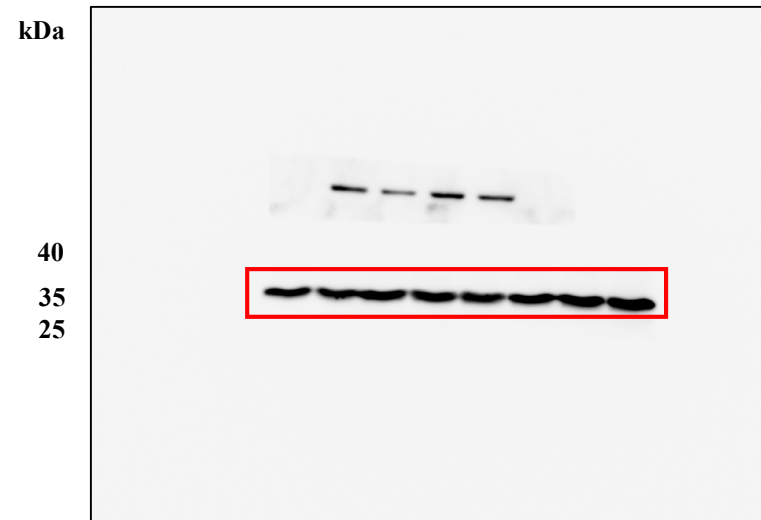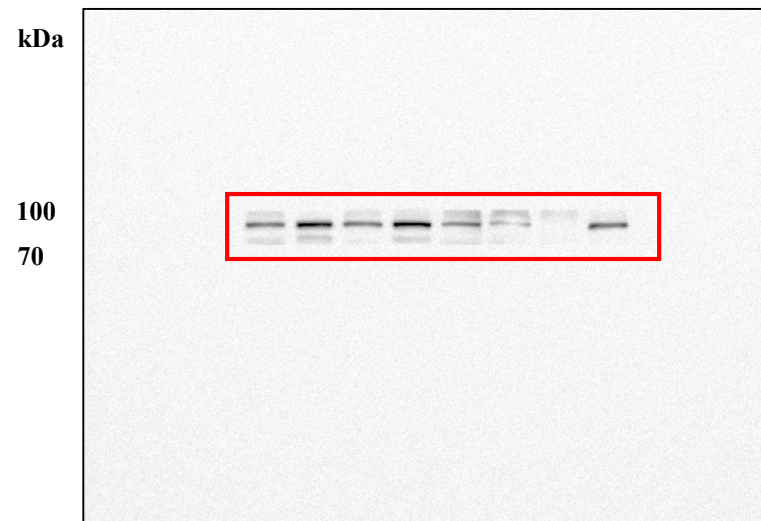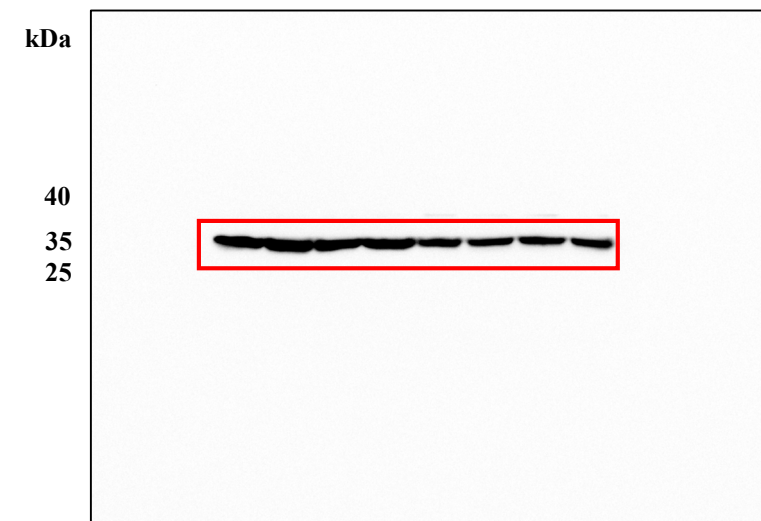

**Anti-HSP90AA1**

**Anti-GAPDH**

## B. Full unedited blots for Fig.11

HT29

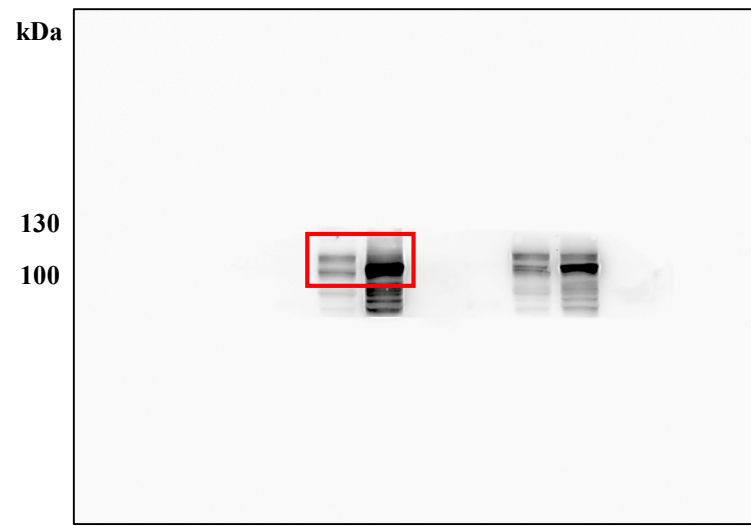

Anti-DAB2IP

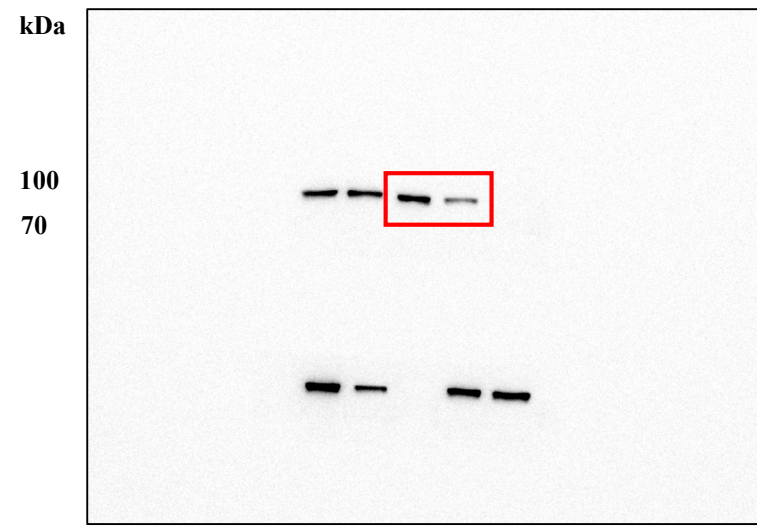

Anti-HSP90AA1

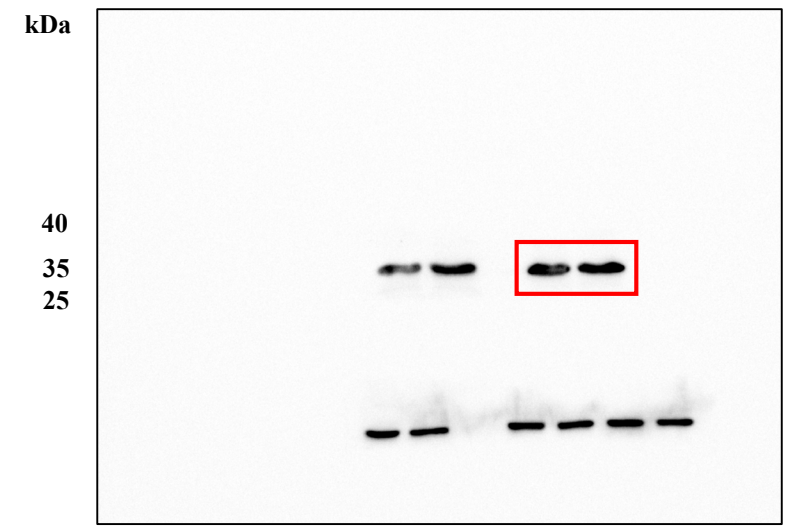

Anti-GAPDH

HCT116

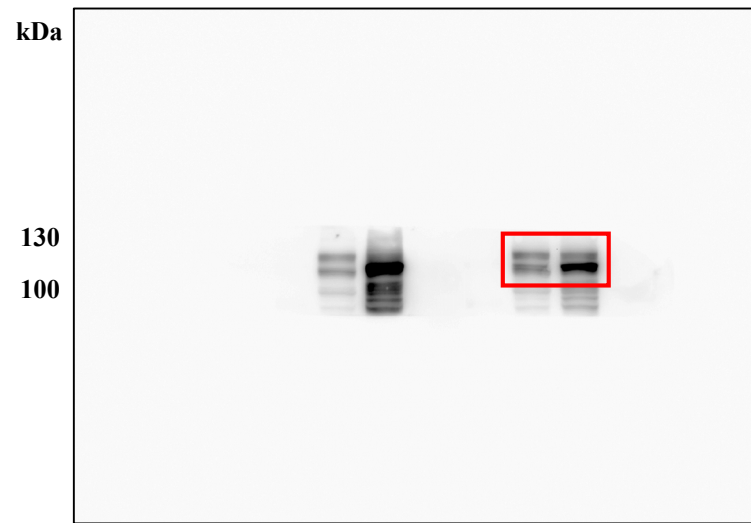

Anti-DAB2IP

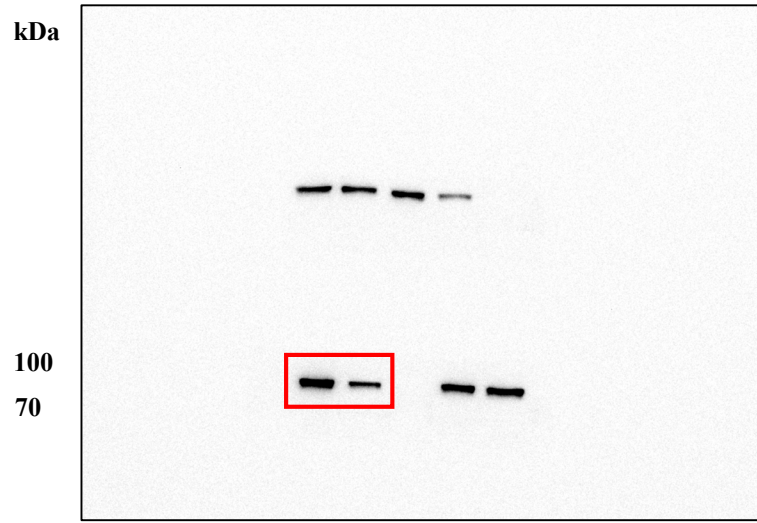

Anti-HSP90AA1

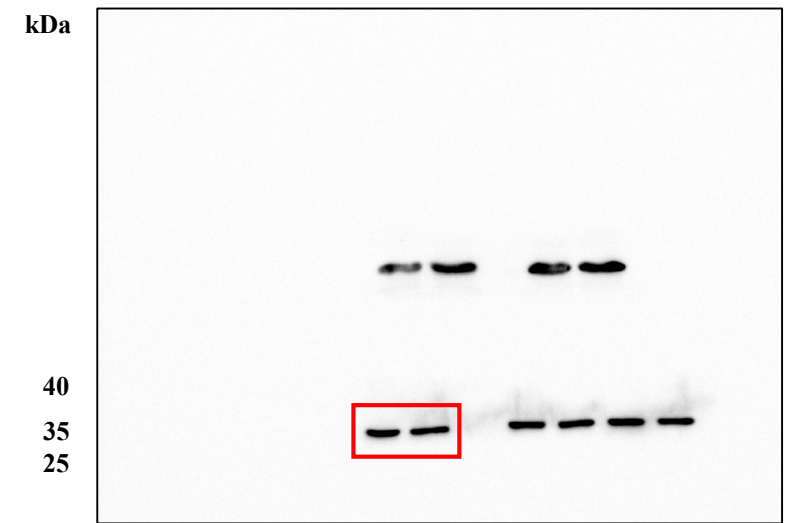

Anti-GAPDH

**Sup B. Full unedited blots for Fig.11**

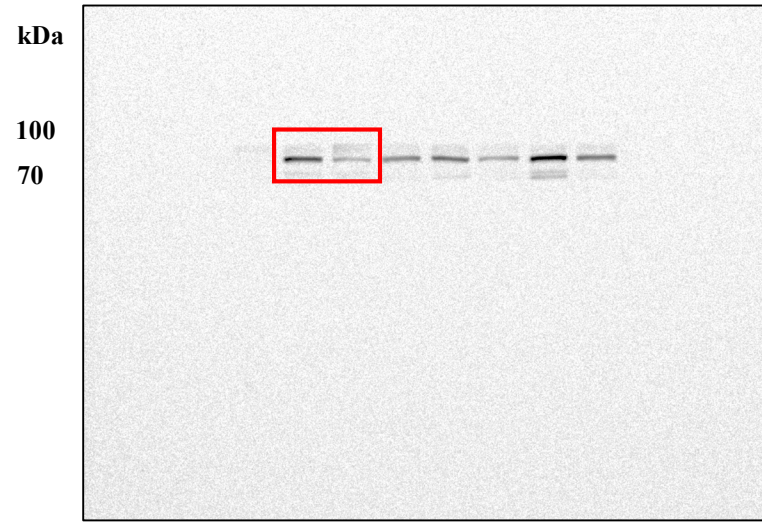

**HT29 Anti-HSP90AA1**

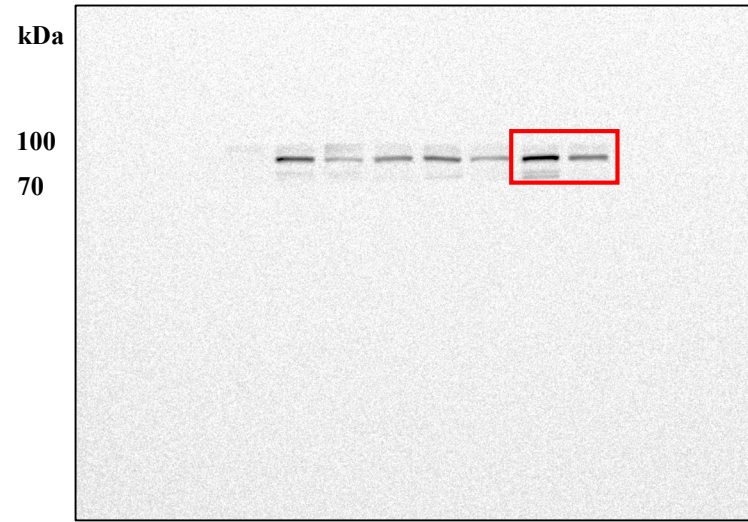

**HCT116 Anti-HSP90AA1**

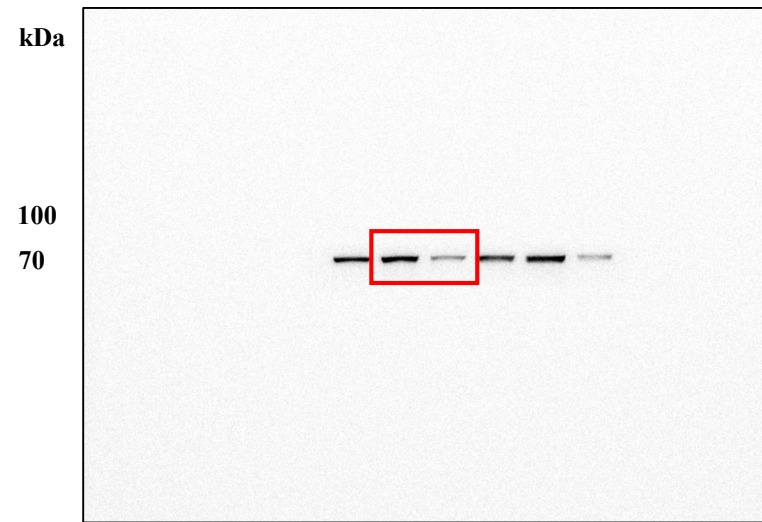

**HT29 Anti-HSP90AA1**

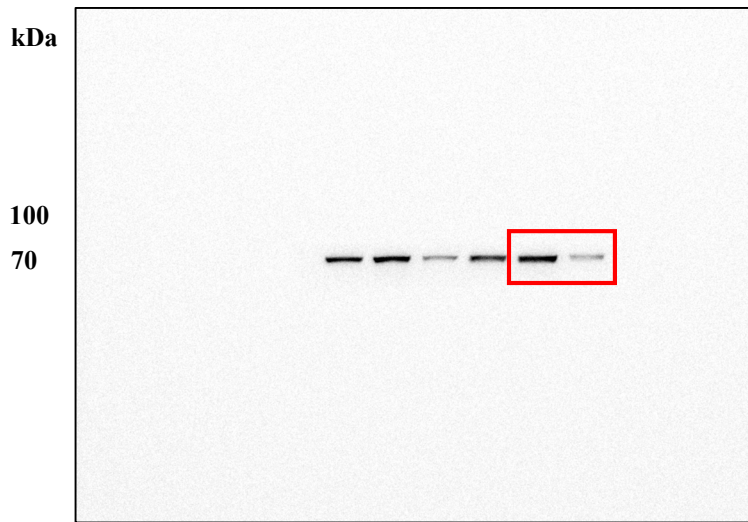

**HCT116 Anti-HSP90AA1**

**Sup B. Full unedited blots for Fig.11**

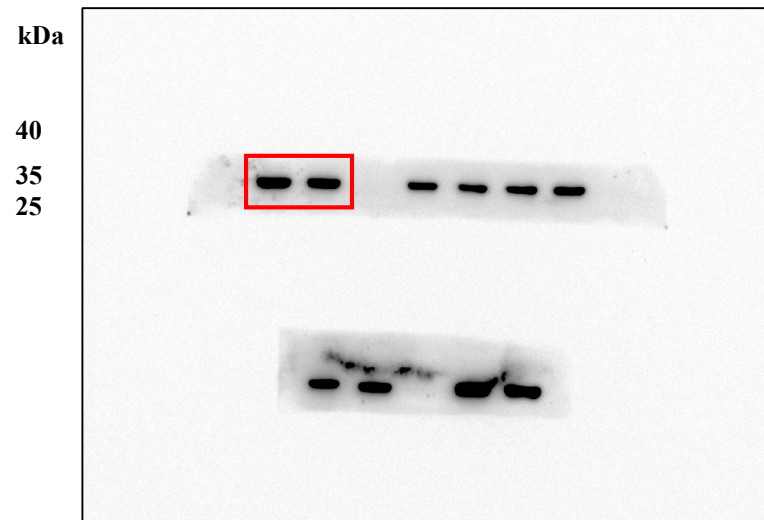

**HT29 Anti-GAPDH**

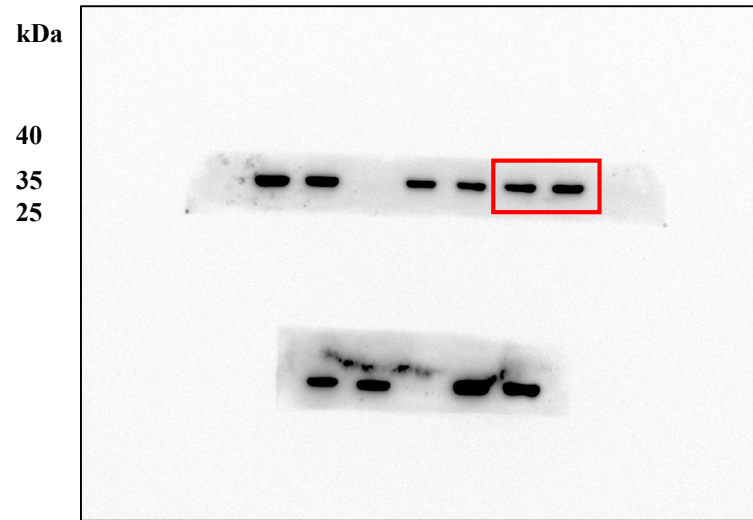

**HCT116 Anti-GAPDH**

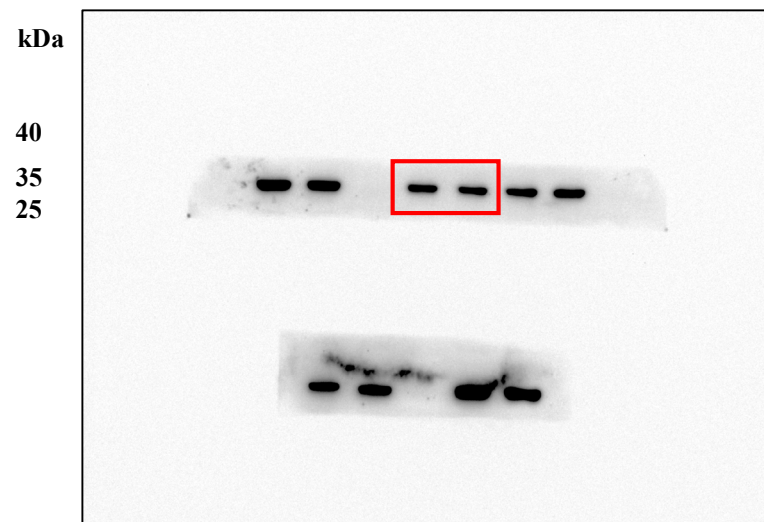

**HT29 Anti-GAPDH**

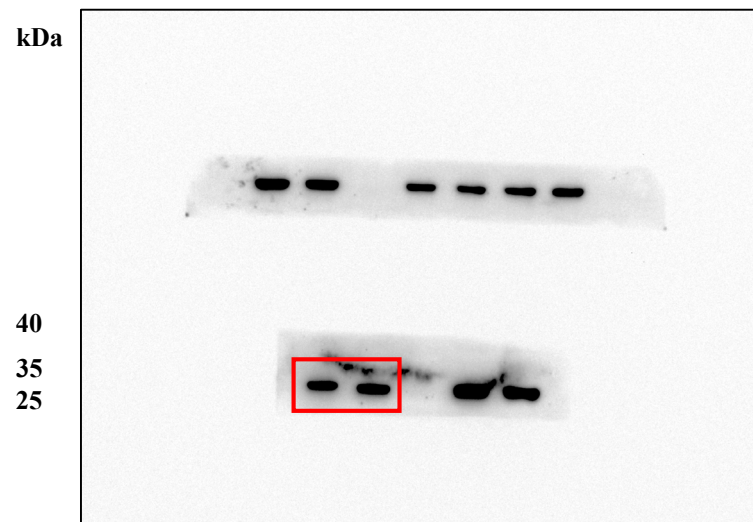

**HCT116 Anti-GAPDH**

### C. Full unedited blots for Fig.1n

HT29

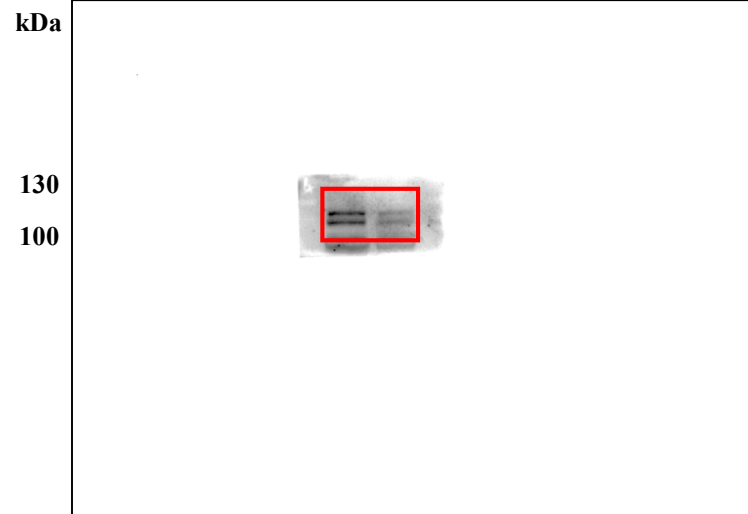

Anti-DAB2IP

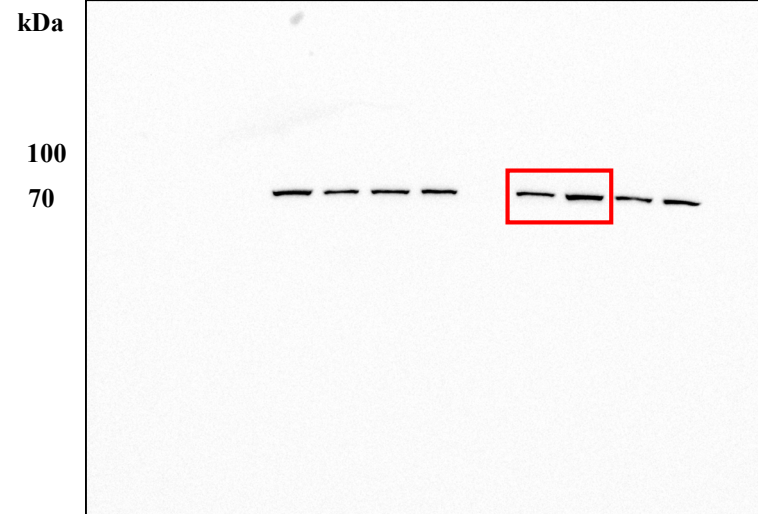

Anti-HSP90AA1

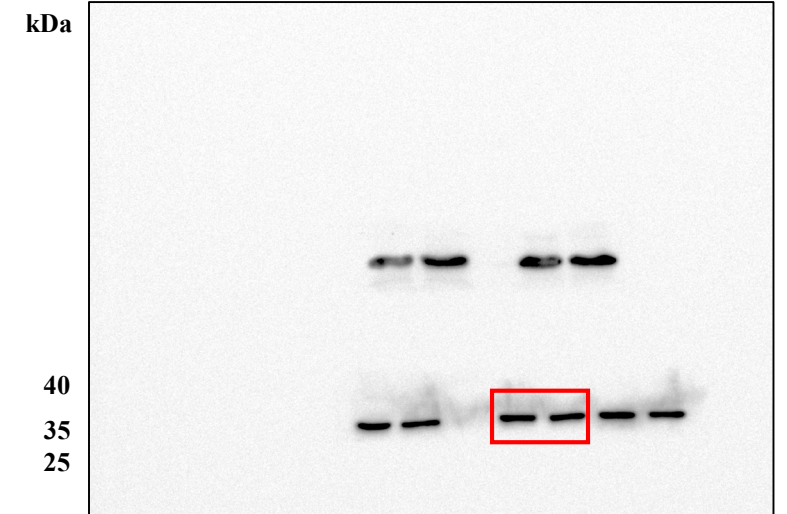

Anti-GAPDH

HCT116

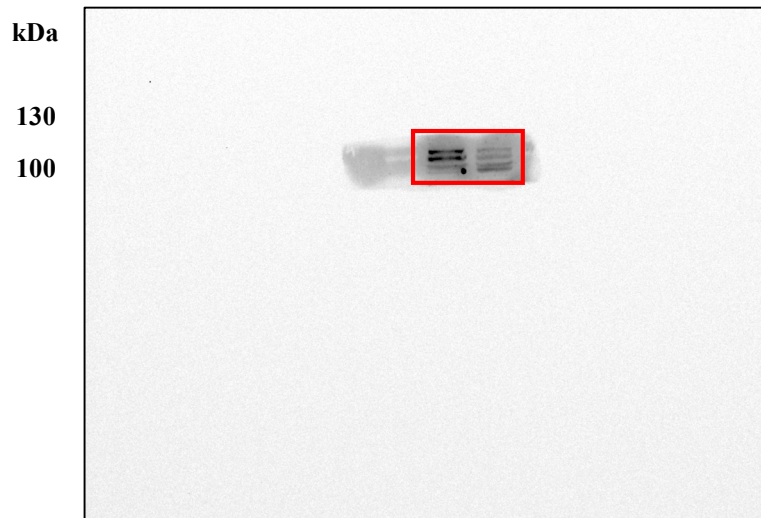

Anti-DAB2IP

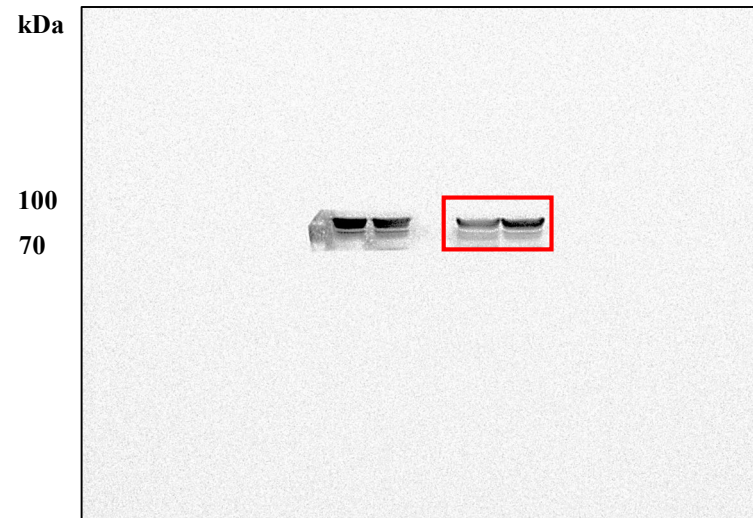

Anti-HSP90AA1

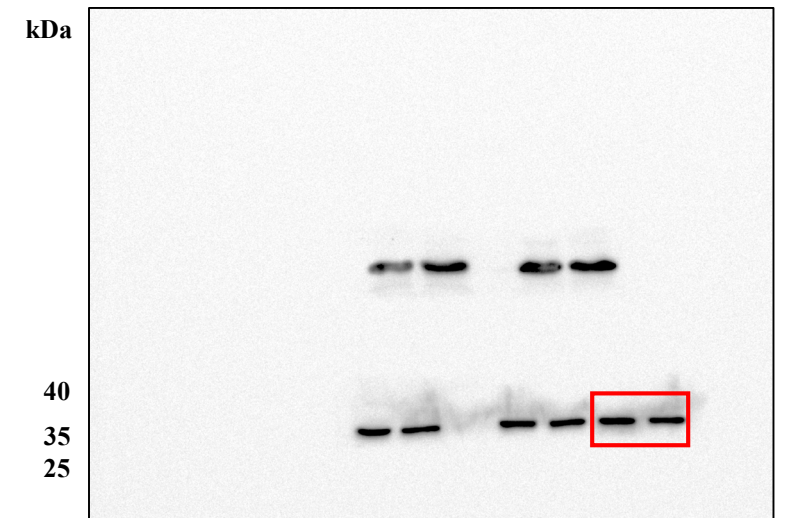

Anti-GAPDH

**Sup C. Full unedited blots for Fig.1n**

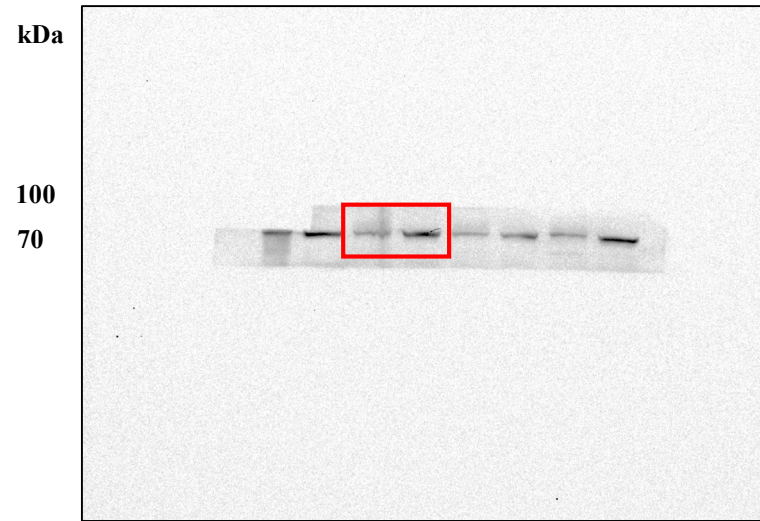

**HT29 Anti-HSP90AA1**

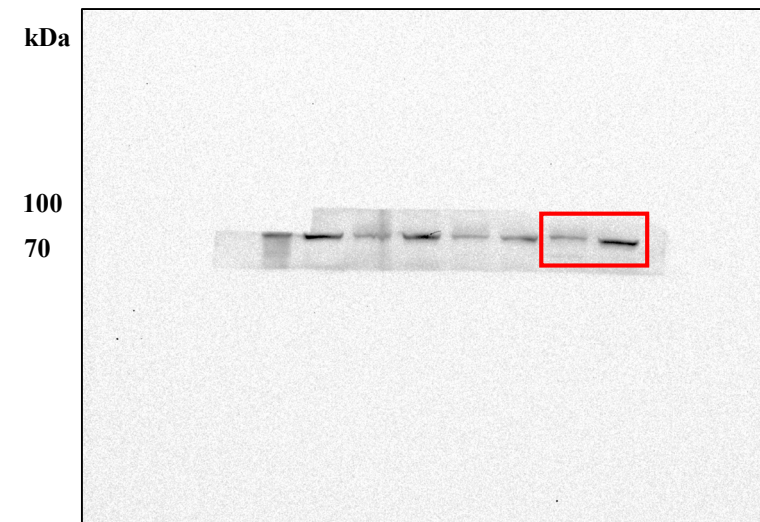

**HT29 Anti-HSP90AA1**



**D. Full unedited blots for Fig.3i**

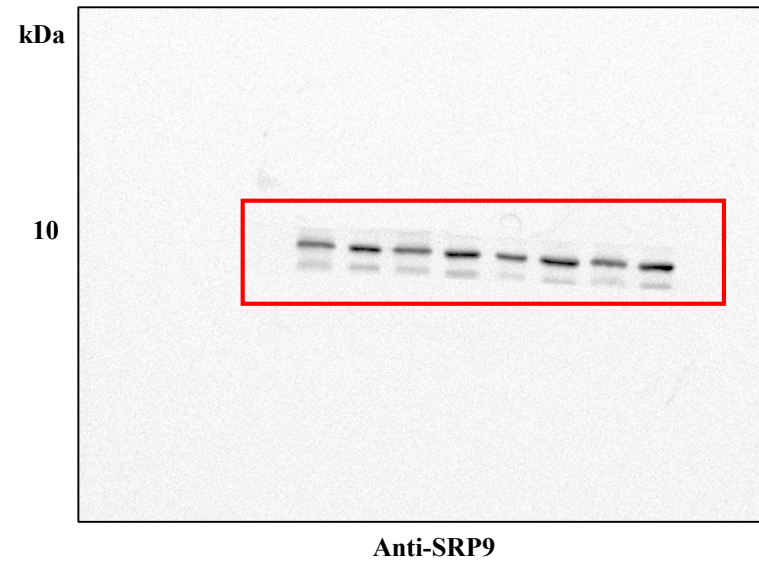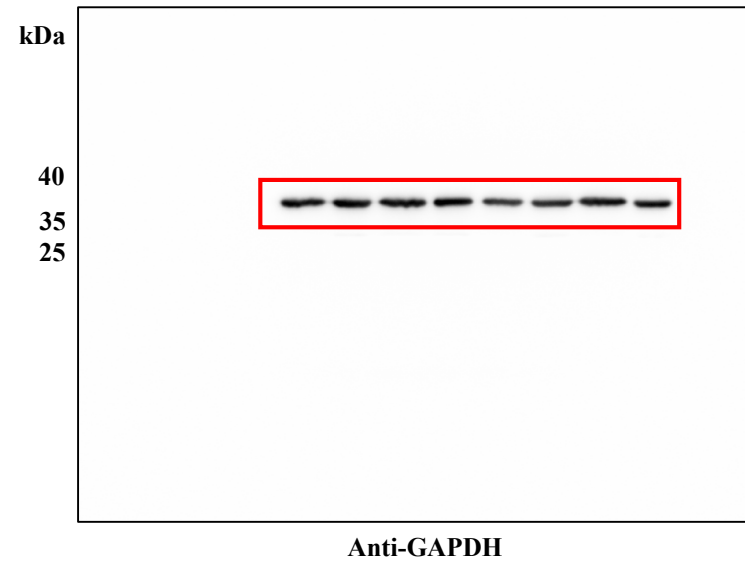

**Sup D. Full unedited blots for Fig.3i**

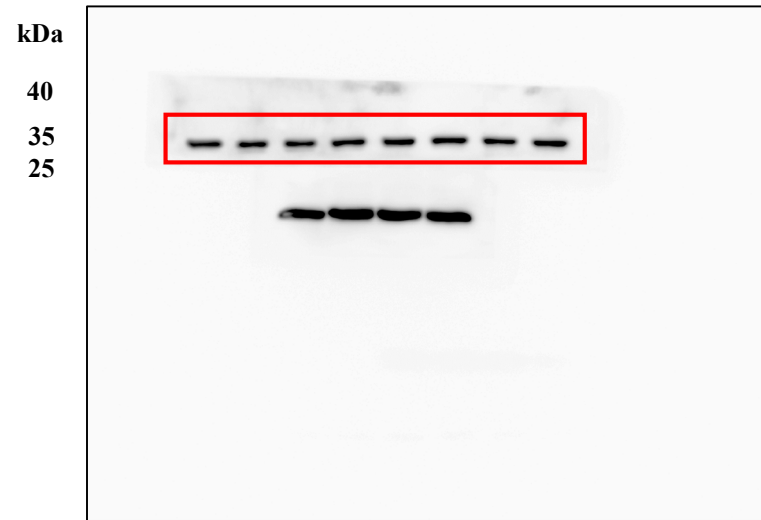

**Anti-GAPDH**

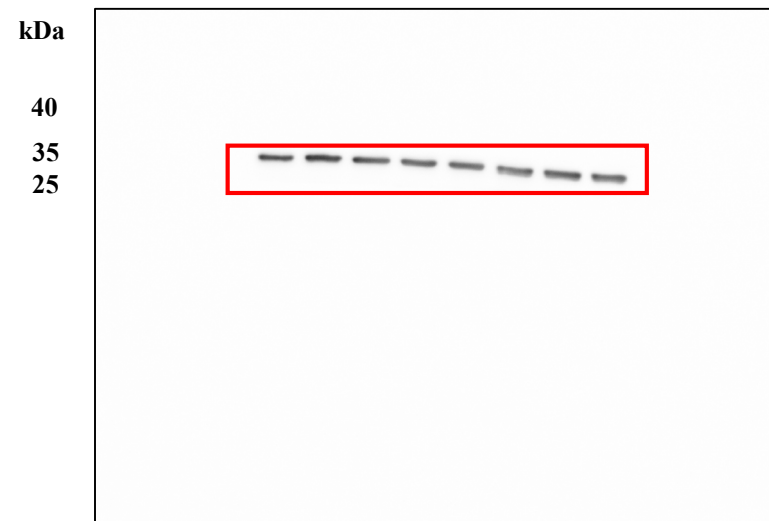

**Anti-GAPDH**

## E. Full unedited blots for Fig.4b

HT29

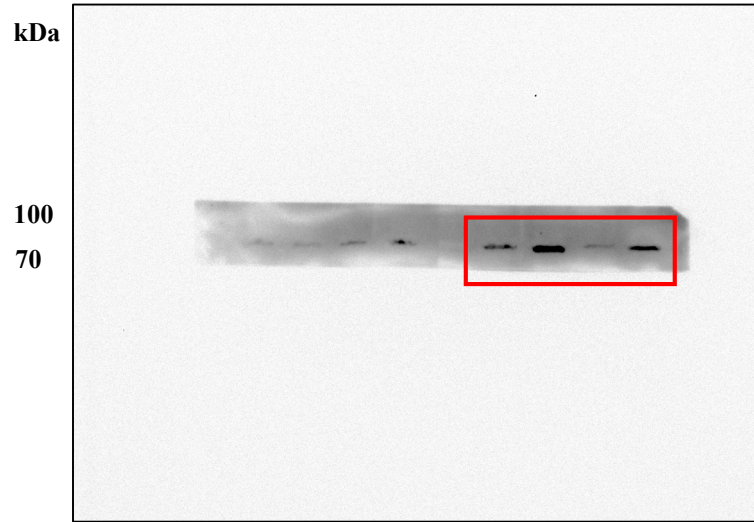

Anti-HSP90AA1

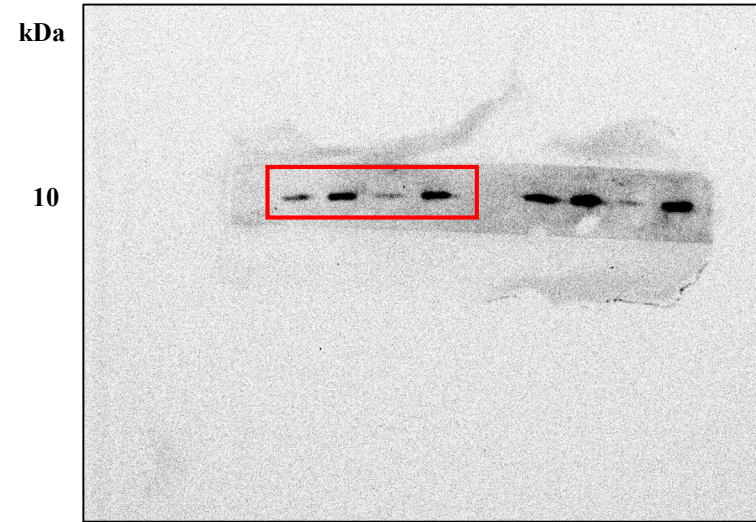

Anti-SRP9

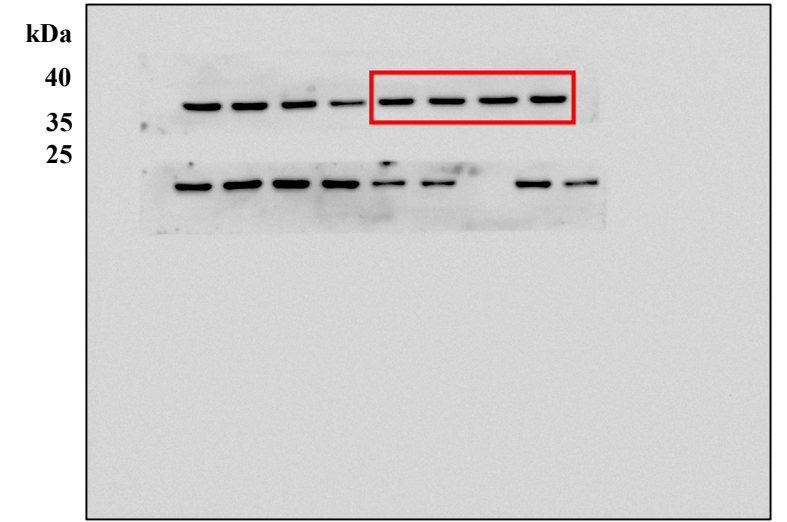

Anti-GAPDH

HCT116

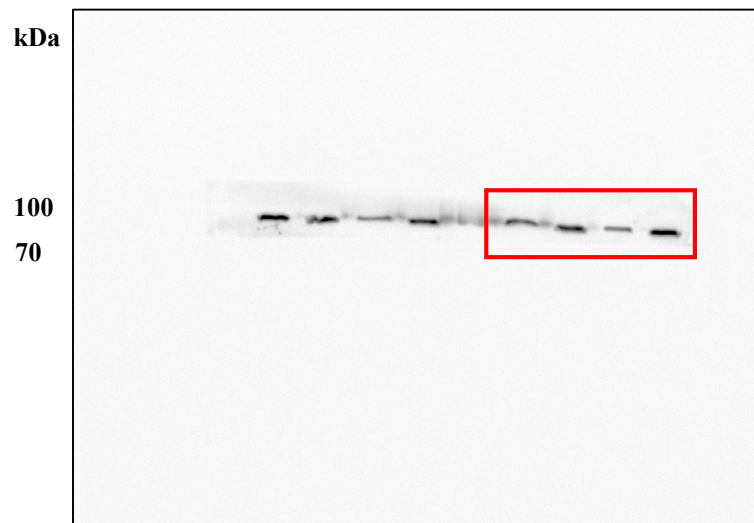

Anti-HSP90AA1

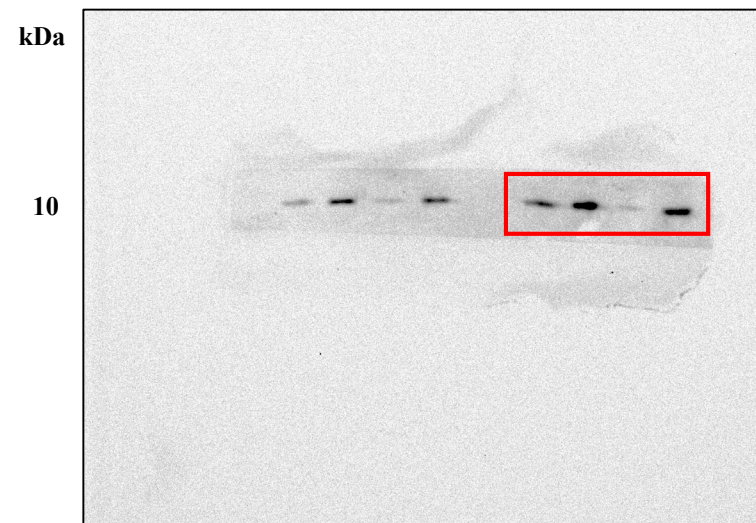

Anti-SRP9

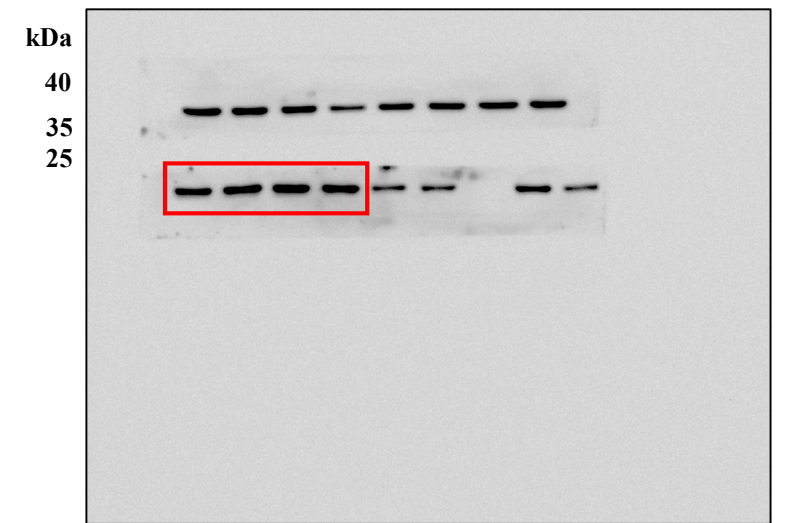

Anti-GAPDH

**F. Full unedited blots for Fig. 5c HT29**

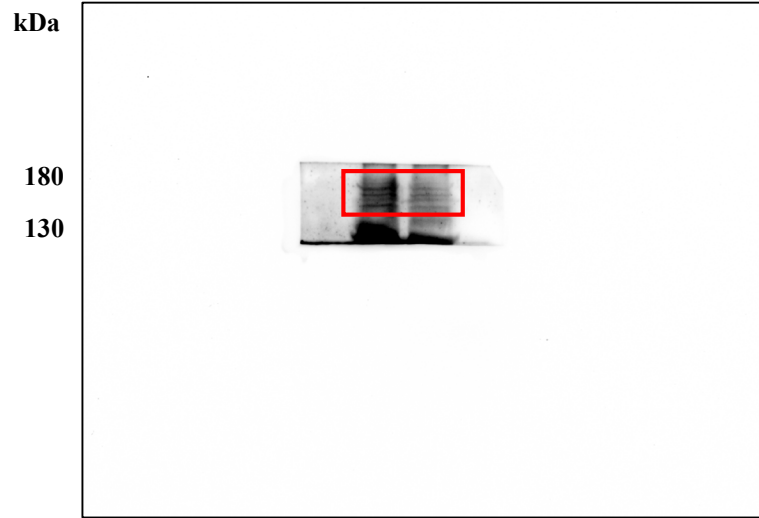

**Anti-p-ASK1(Thr845)**

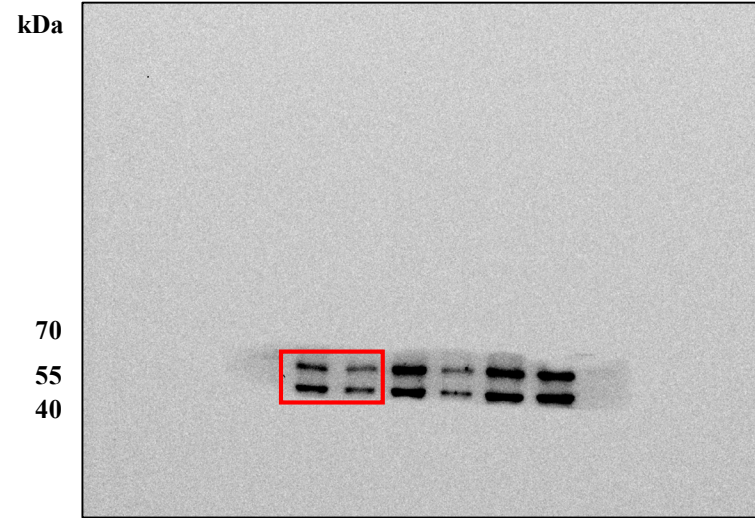

**Anti-p- JNK(Thr183 / Tyr185)**

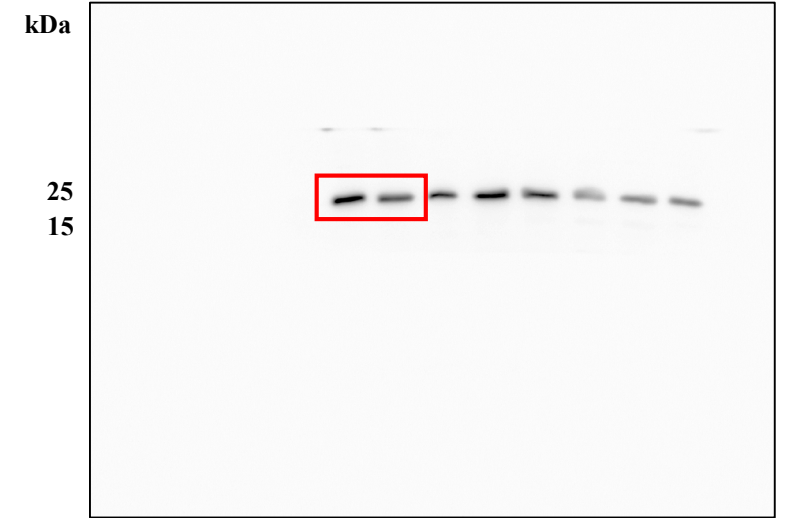

**Anti-BAX**

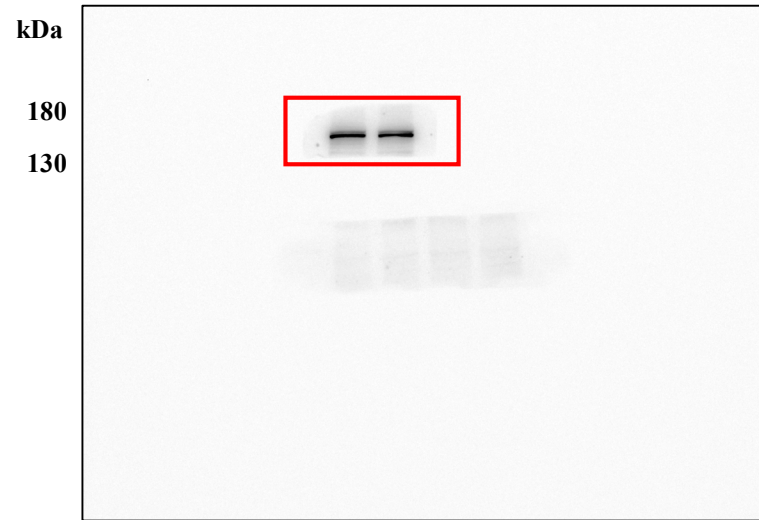

**Anti-T-ASK1**

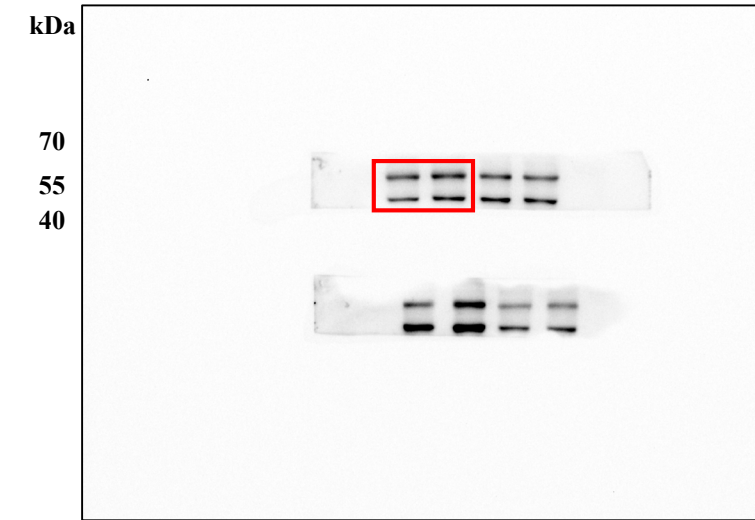

**Anti-T- JNK**

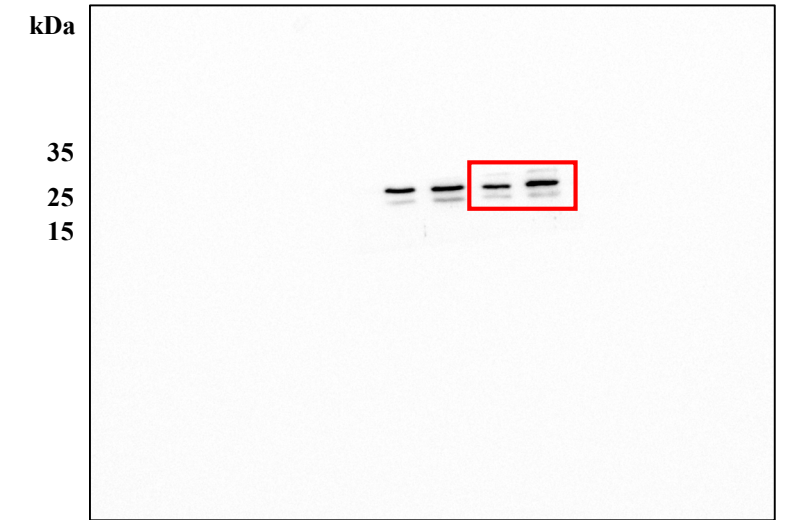

**Anti-BCL-2**

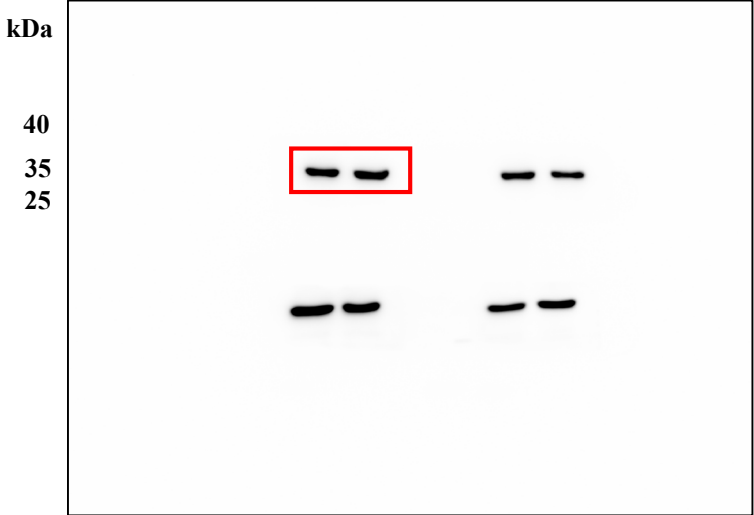

Anti-GAPDH

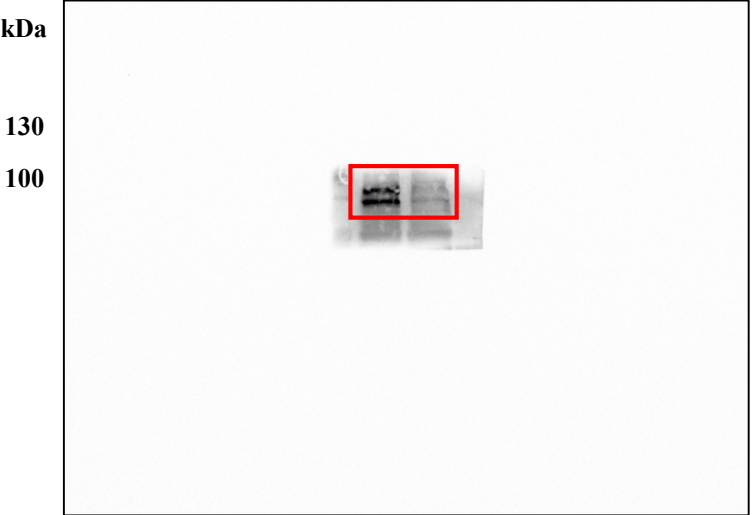

Anti-DAB2IP

**F. Full unedited blots for Fig.5c HCT116**

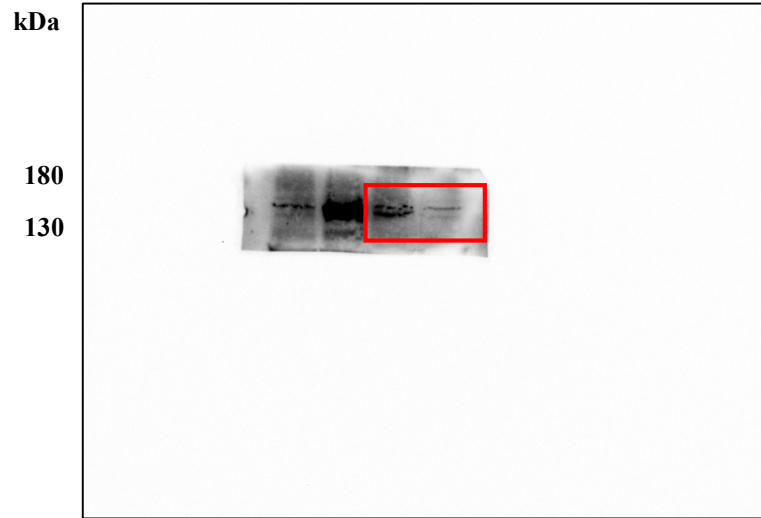

**Anti-p-ASK1(Thr845)**

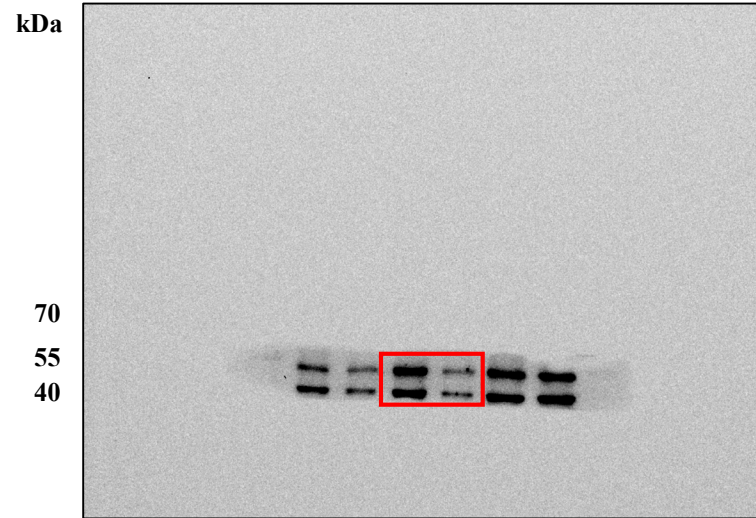

**Anti-p- JNK(Thr183 / Tyr185)**

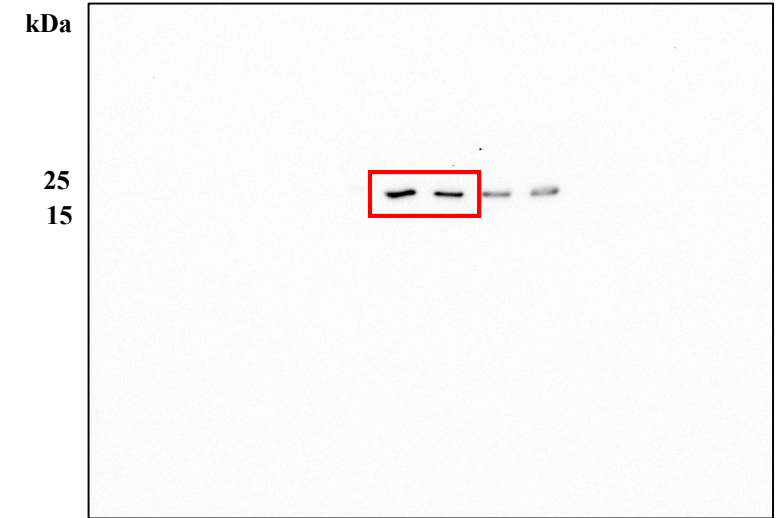

**Anti-BAX**

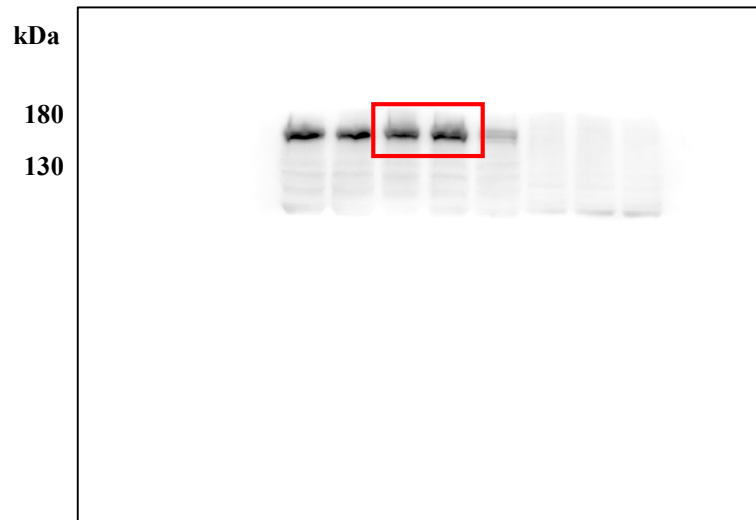

**Anti-T-ASK1**

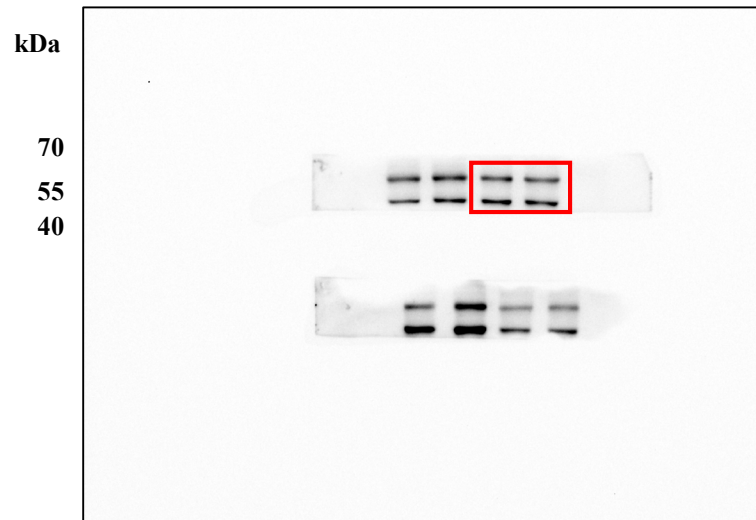

**Anti-T- JNK**

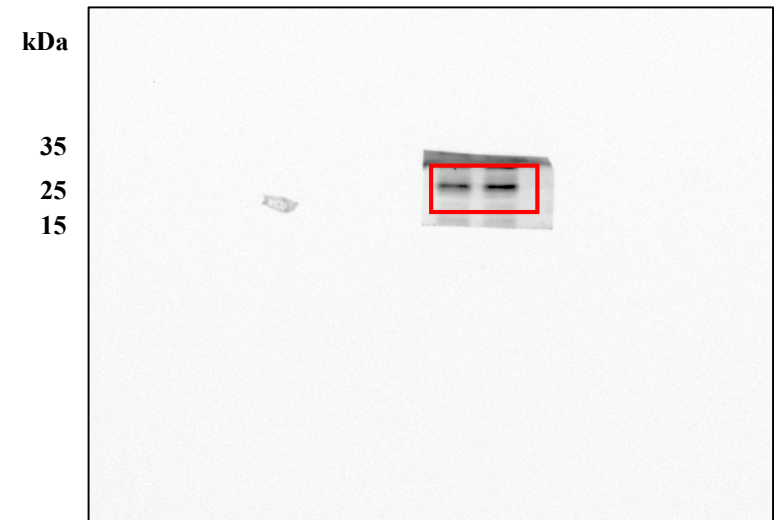

**Anti-BCL-2**

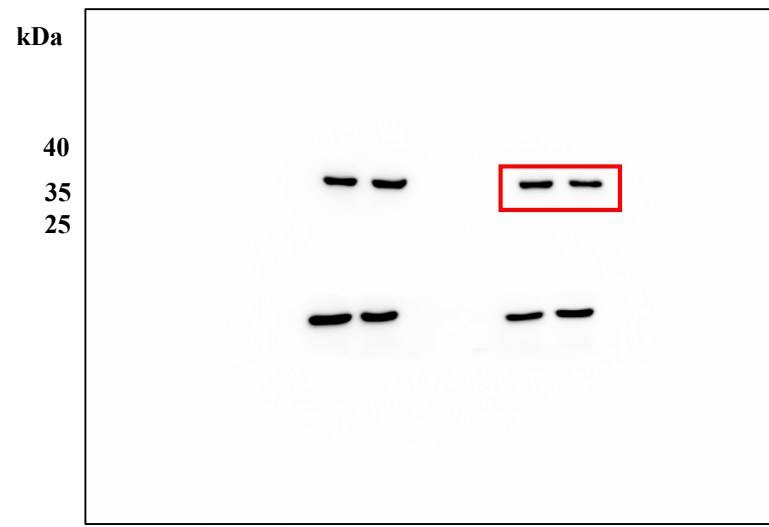

Anti-GAPDH

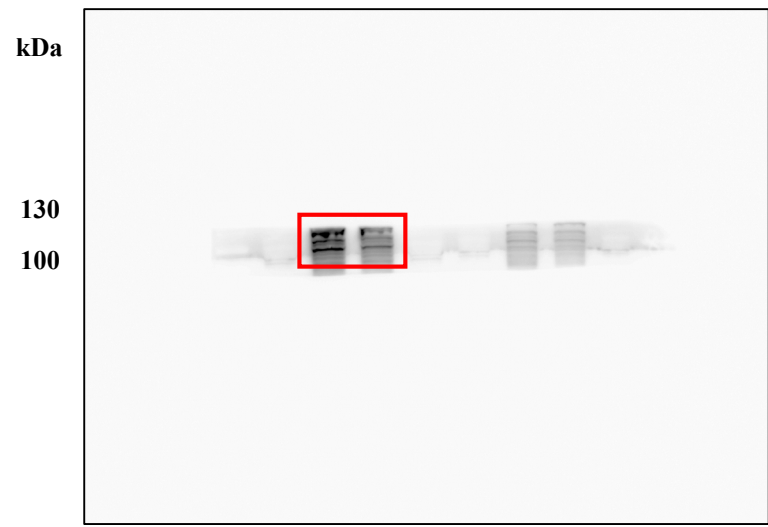

Anti-DAB2IP

**Sup F. Full unedited blots for Fig.5c**

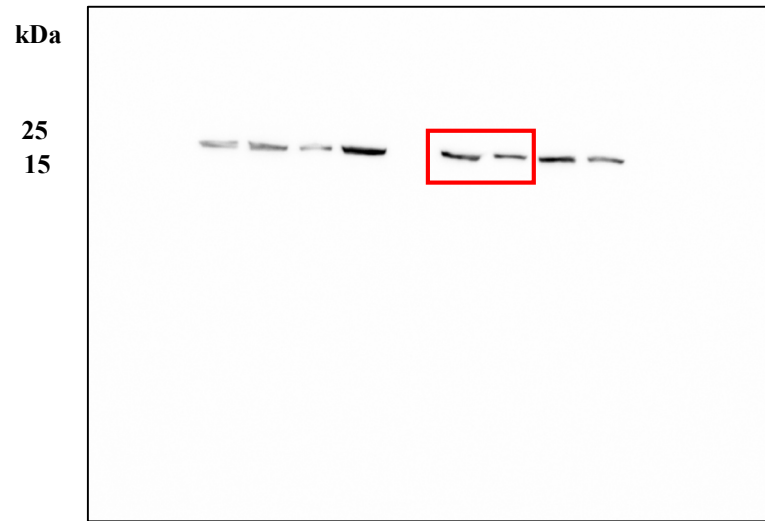

**HT29 Anti-BAX**

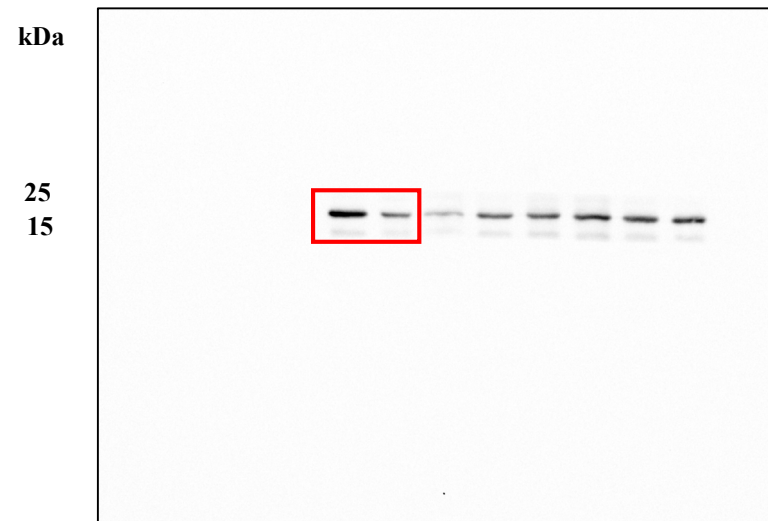

**HCT116 Anti-BAX**

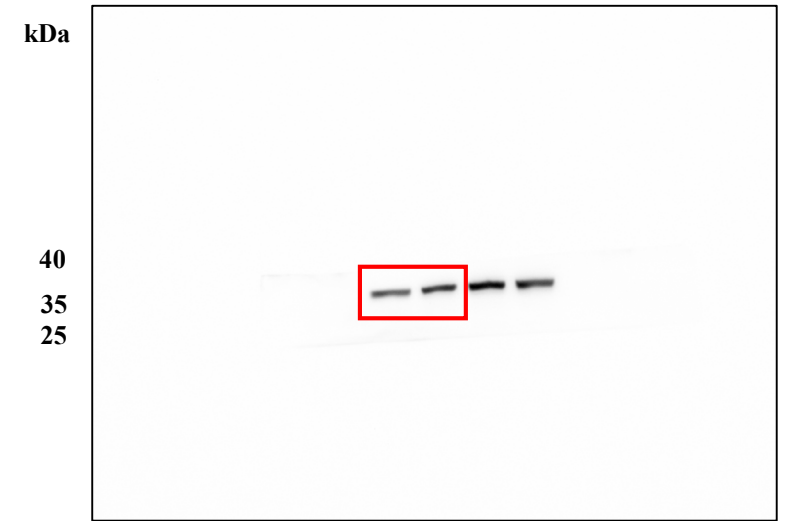

**HT29 Anti-BCL-2**

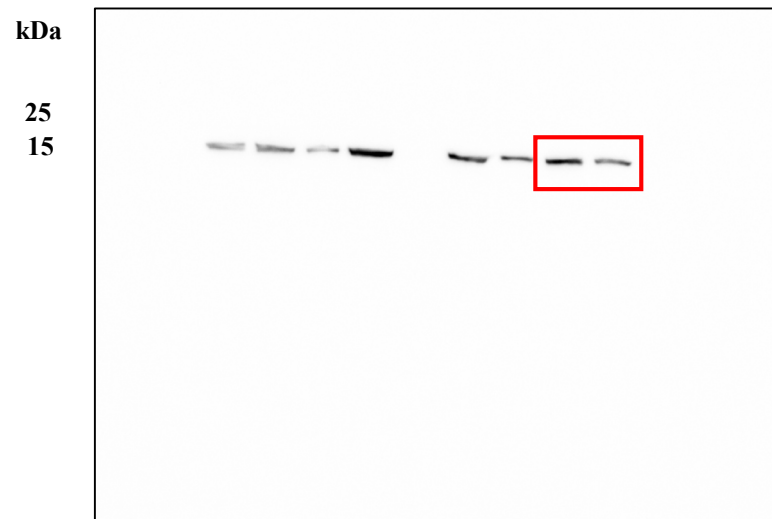

**HT29 Anti-BAX**

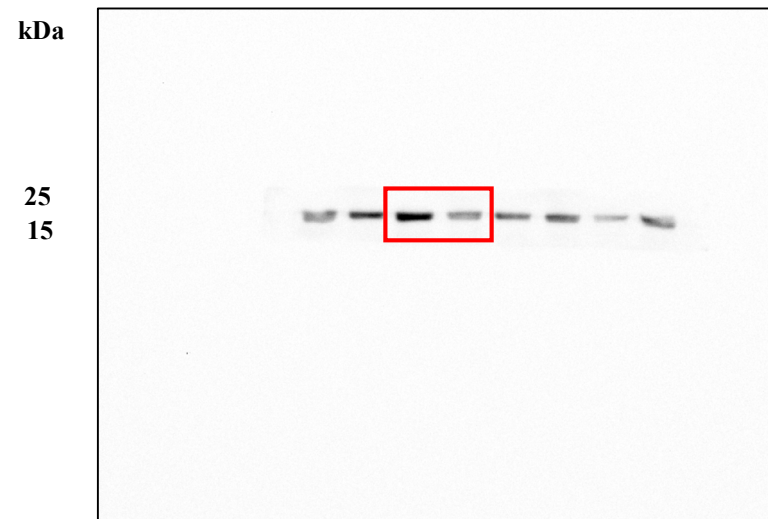

**HCT116 Anti-BAX**

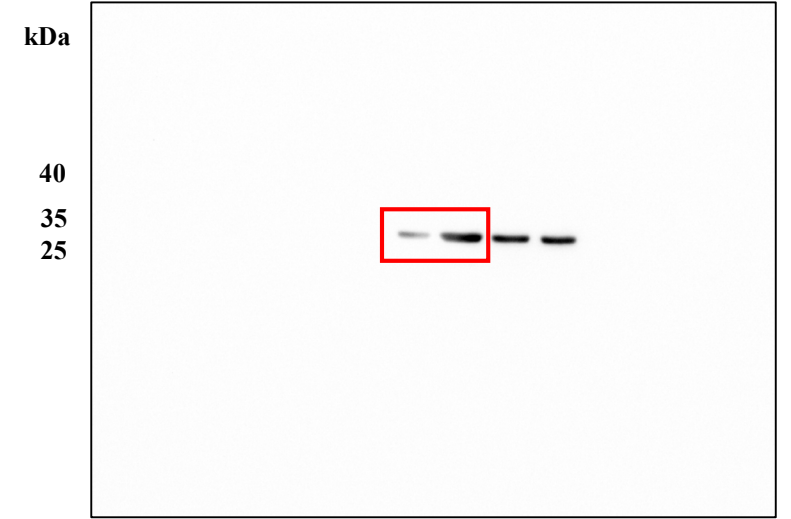

**HT29 Anti-BCL-2**



**Sup F. Full unedited blots for Fig.5c**

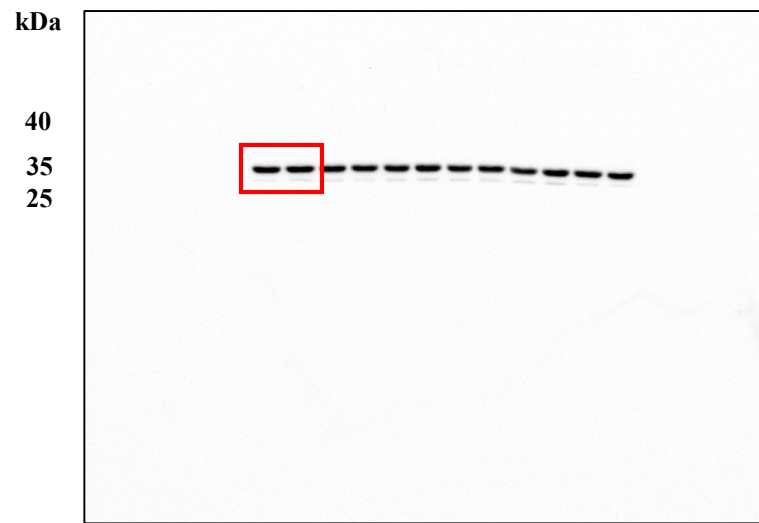

**HT29 Anti-GAPDH**

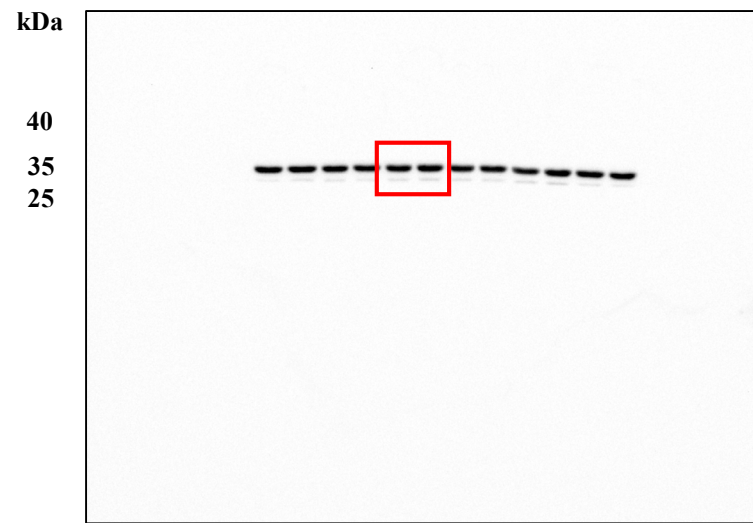

**HCT116 Anti-GAPDH**

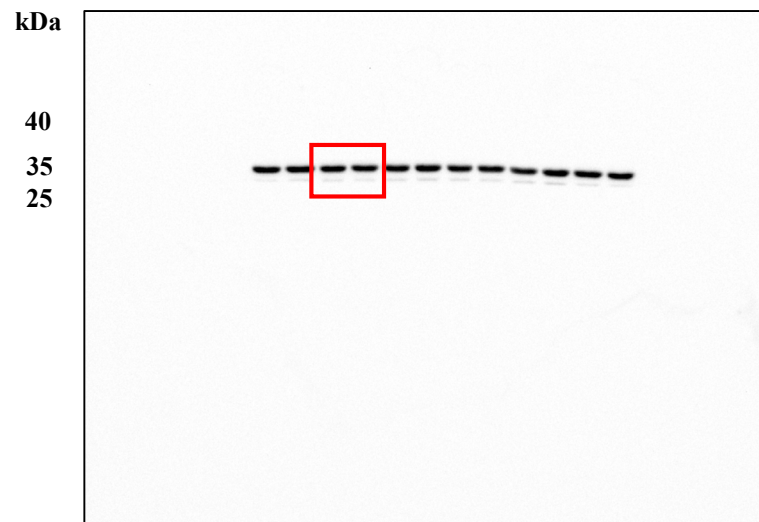

**HT29 Anti-GAPDH**

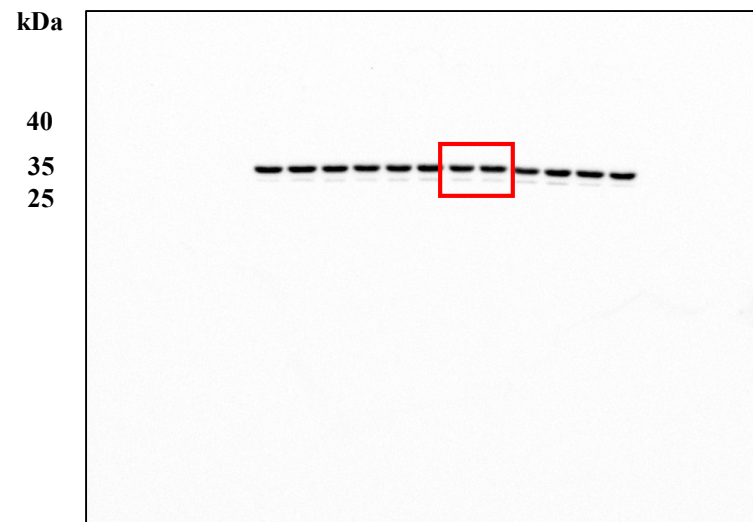

**HCT116 Anti-GAPDH**

### G. Full unedited blots for Fig.5d HT29

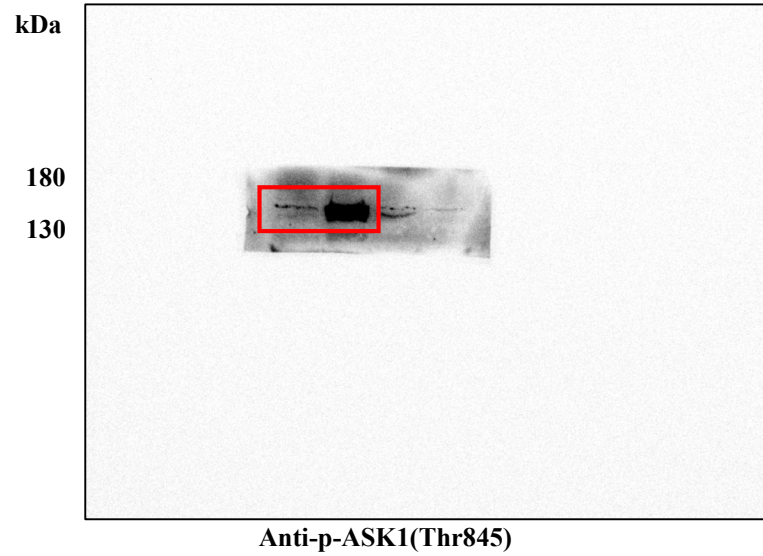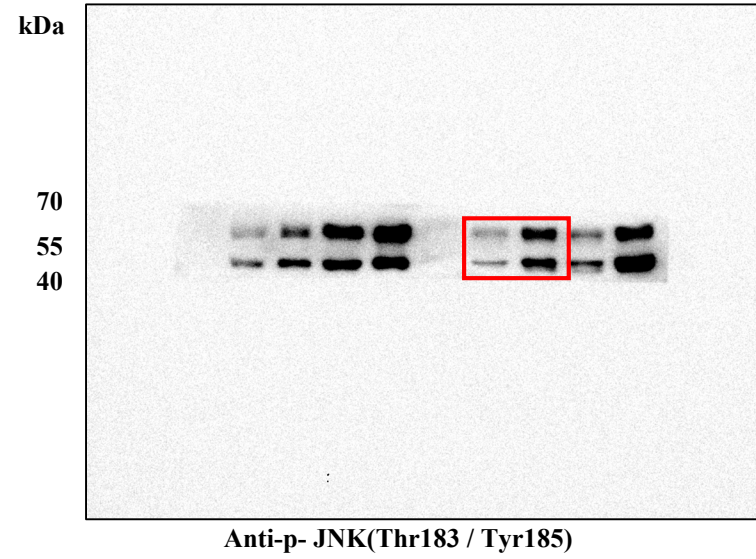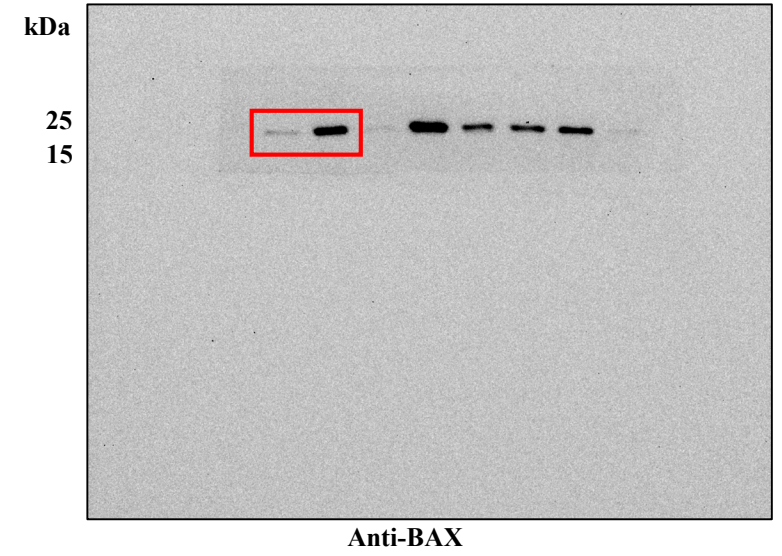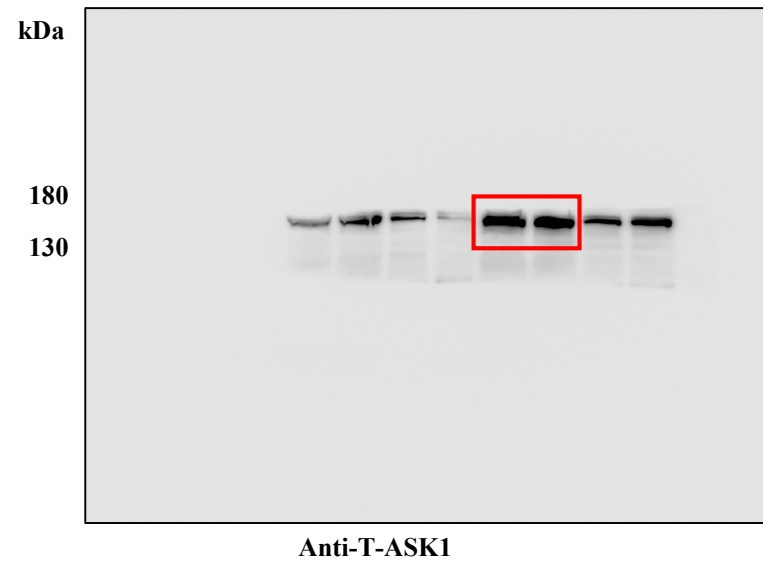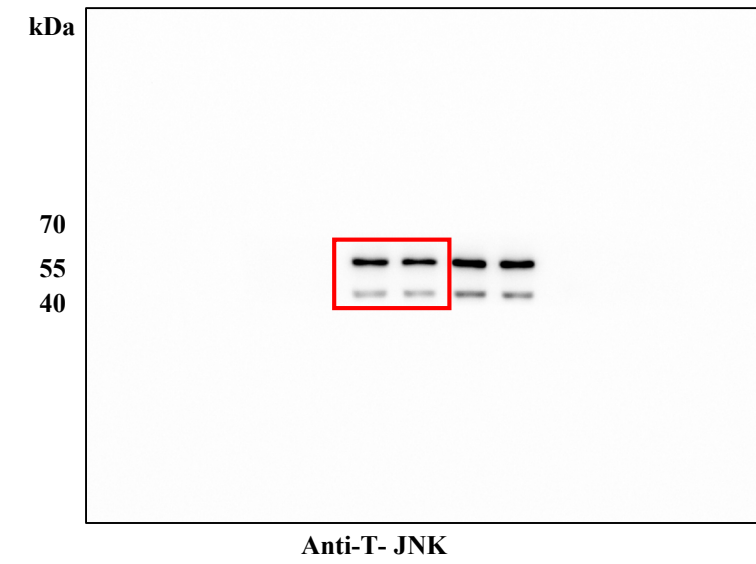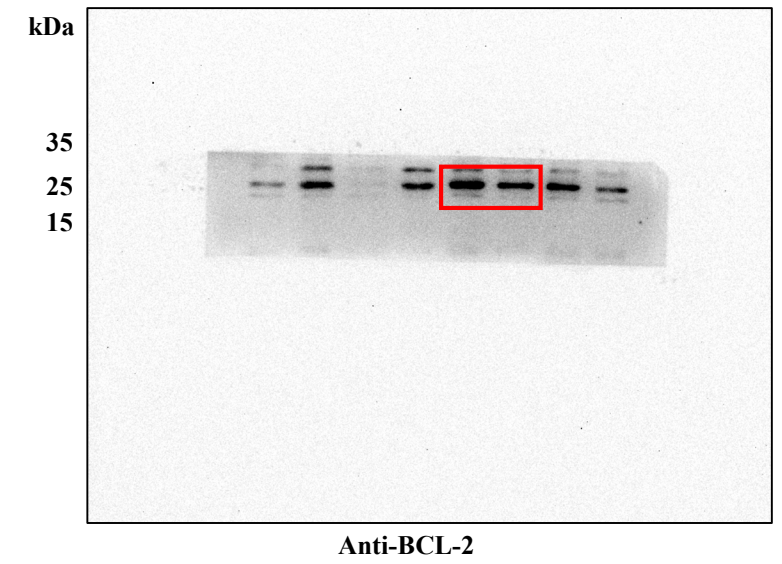

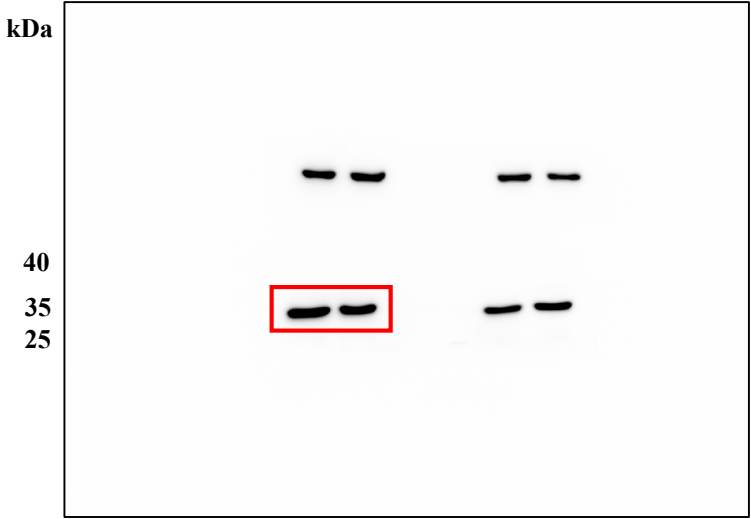

Anti-GAPDH

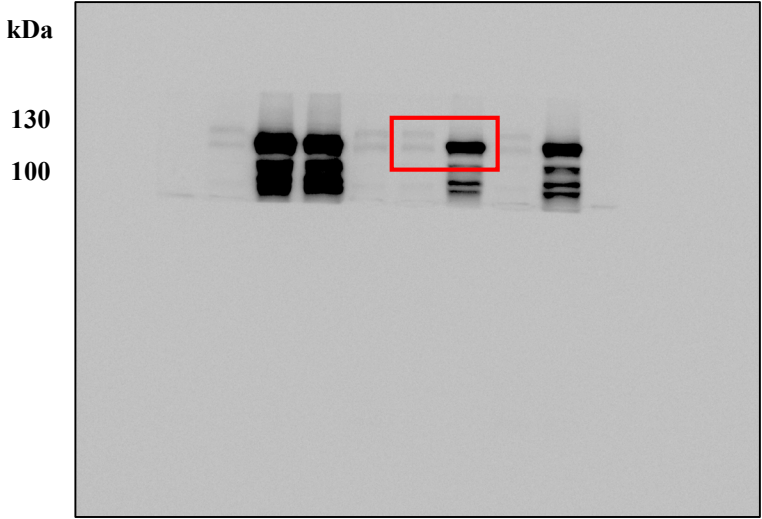

Anti-DAB2IP

### G. Full unedited blots for Fig.5d HCT116

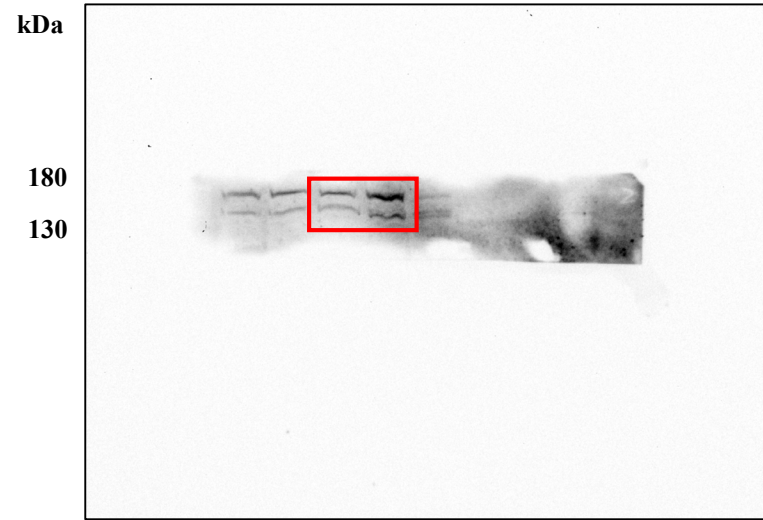

Anti-p-ASK1(Thr845)

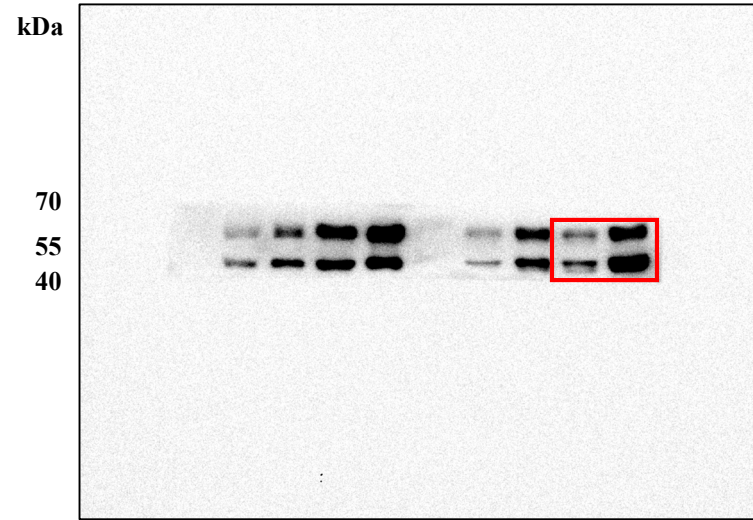

Anti-p- JNK(Thr183 / Tyr185)

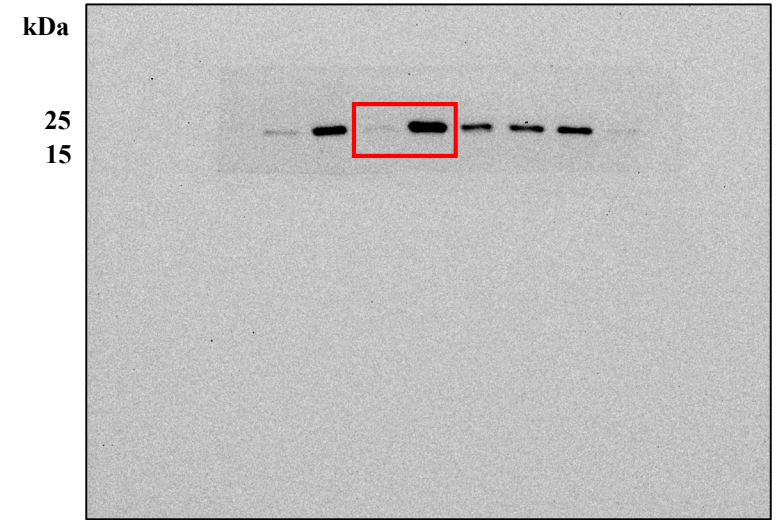

Anti-BAX

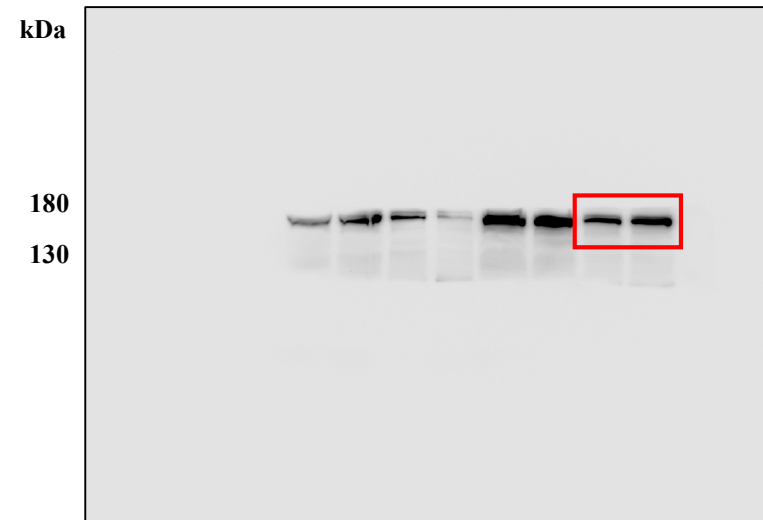

Anti-T-ASK1

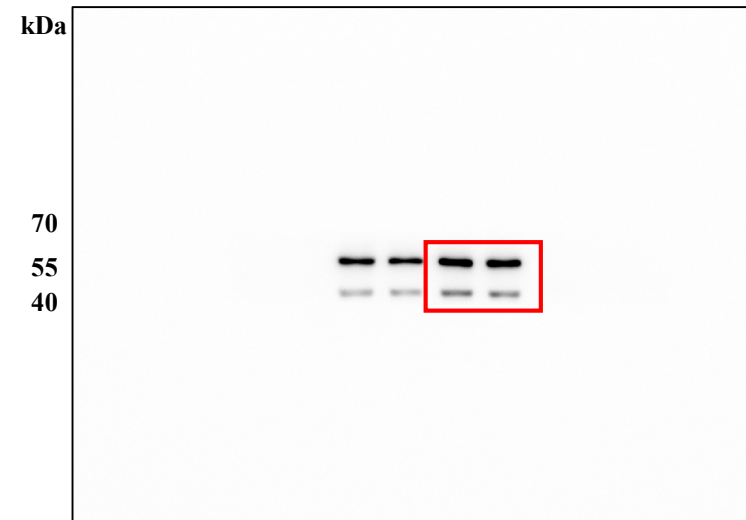

Anti-T- JNK

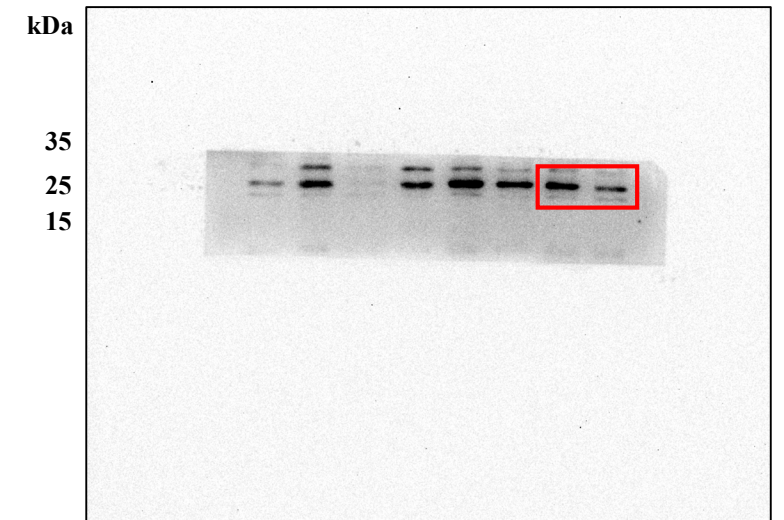

Anti-BCL-2

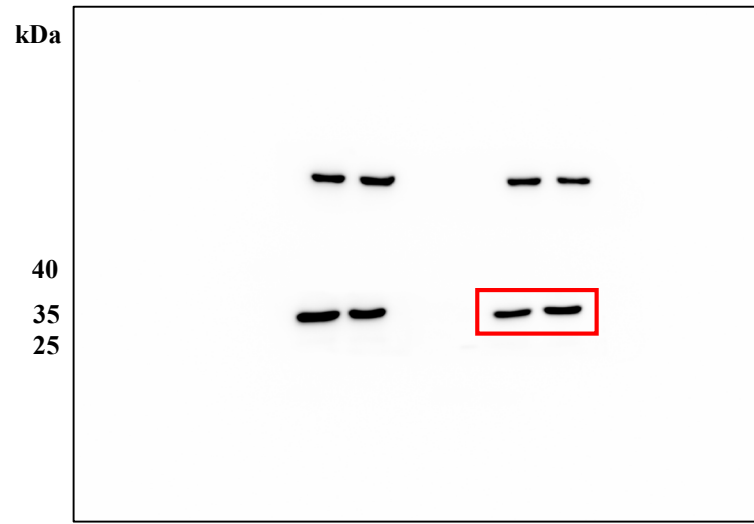

Anti-GAPDH

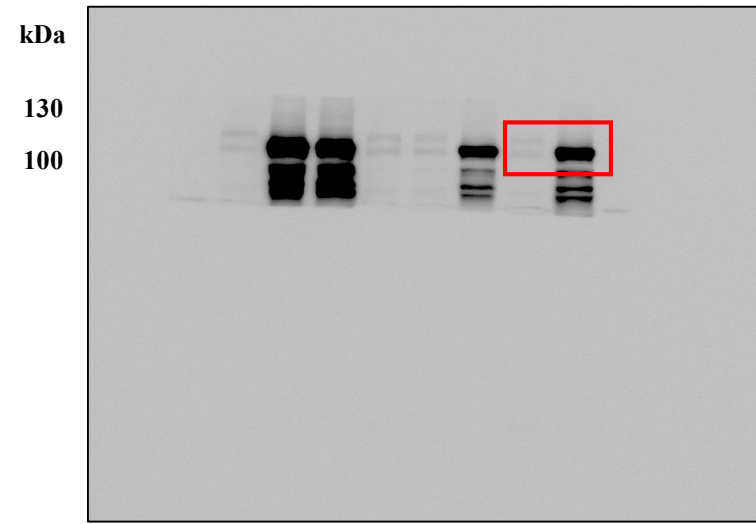

Anti-DAB2IP

**Sup G. Full unedited blots for Fig.5d**

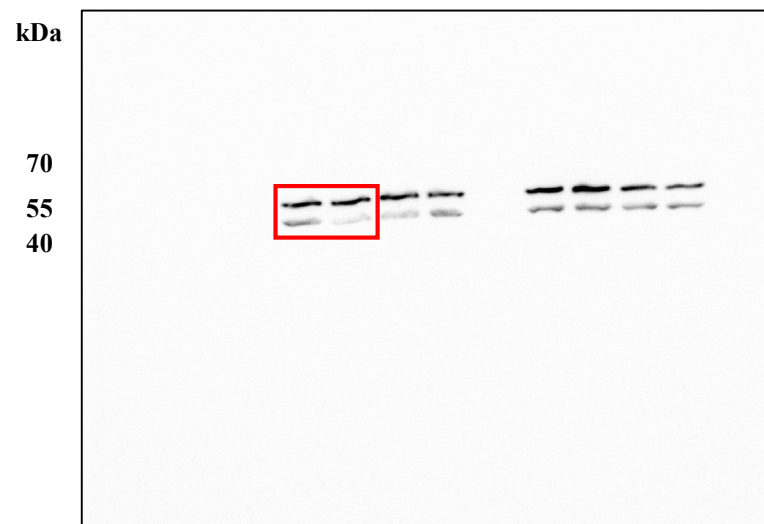

**HT29 Anti-T- JNK**

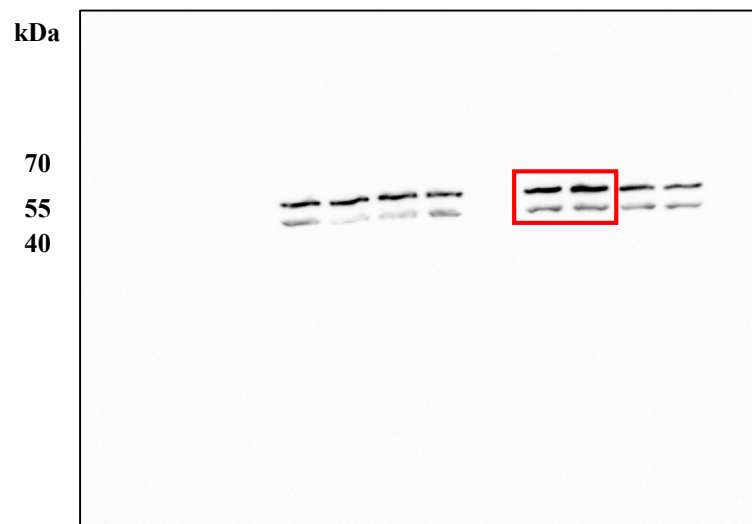

**HCT16 Anti-T- JNK**

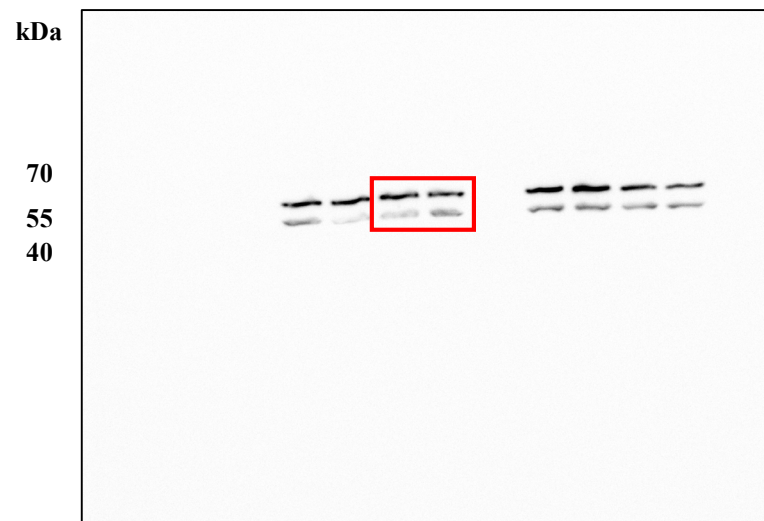

**HT29 Anti-T- JNK**

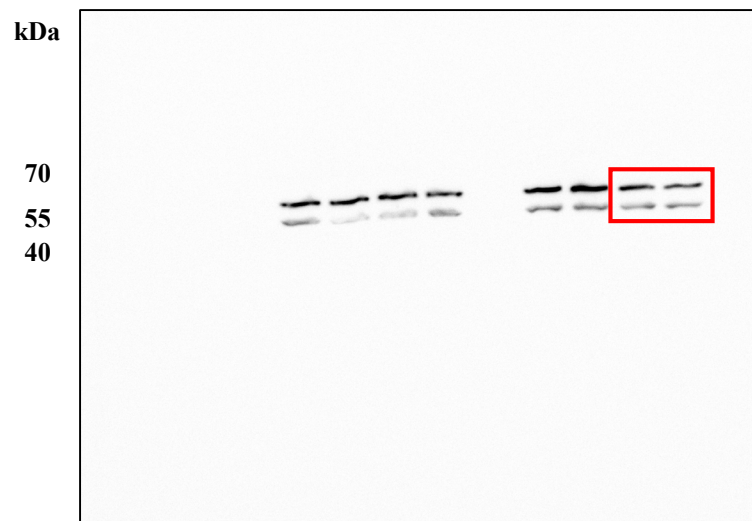

**HCT16 Anti-T- JNK**

**Sup G. Full unedited blots for Fig.5d**

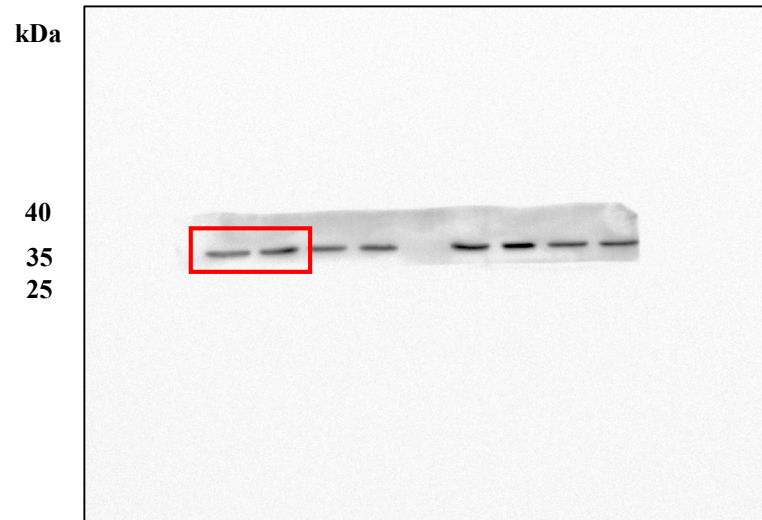

**HT29 Anti-GAPDH**

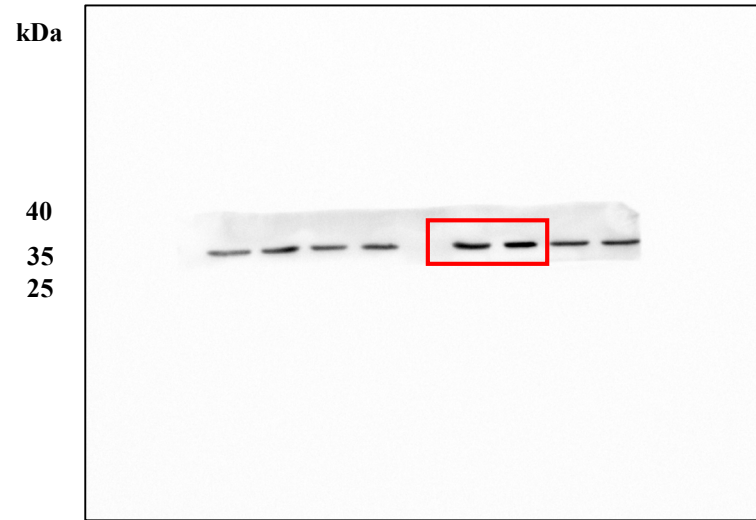

**HCT116 Anti-GAPDH**

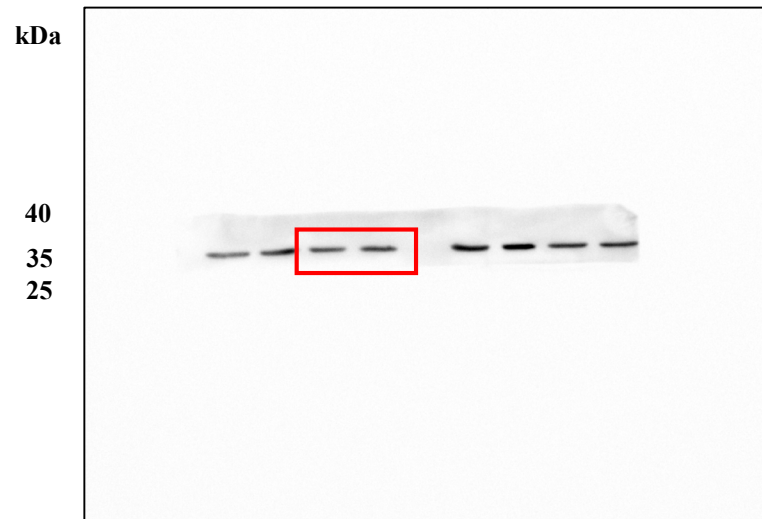

**HT29 Anti-GAPDH**

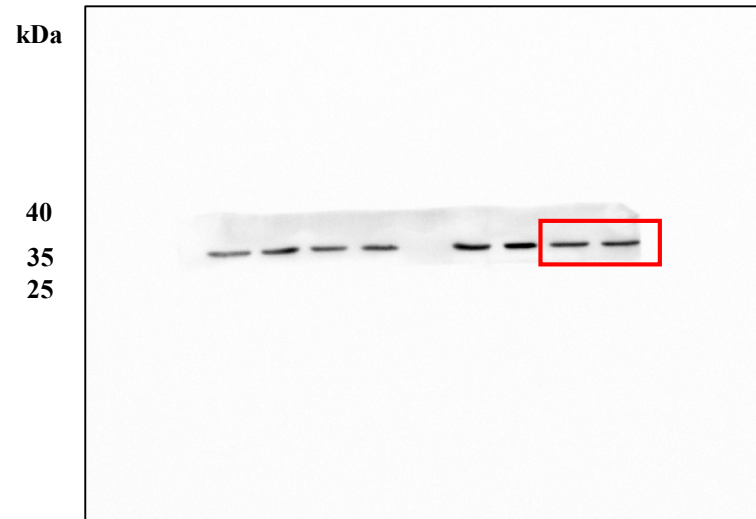

**HCT116 Anti-GAPDH**

## H. Full unedited blots for Fig.5e HT29

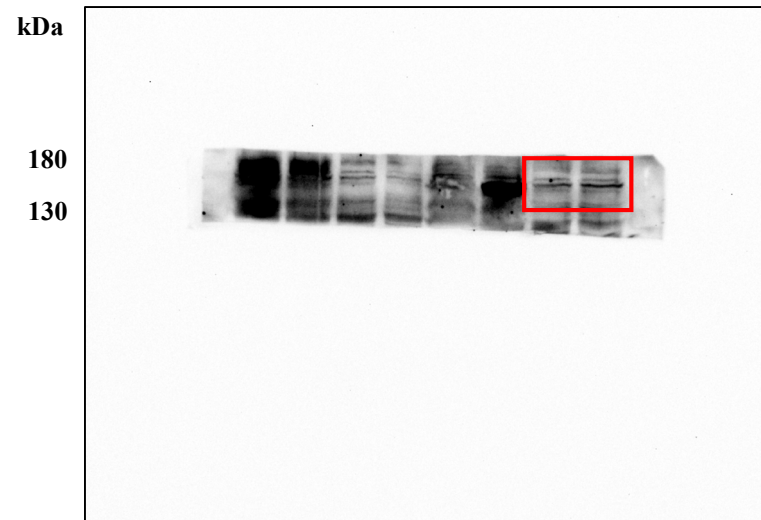

Anti-p-ASK1(Thr845)

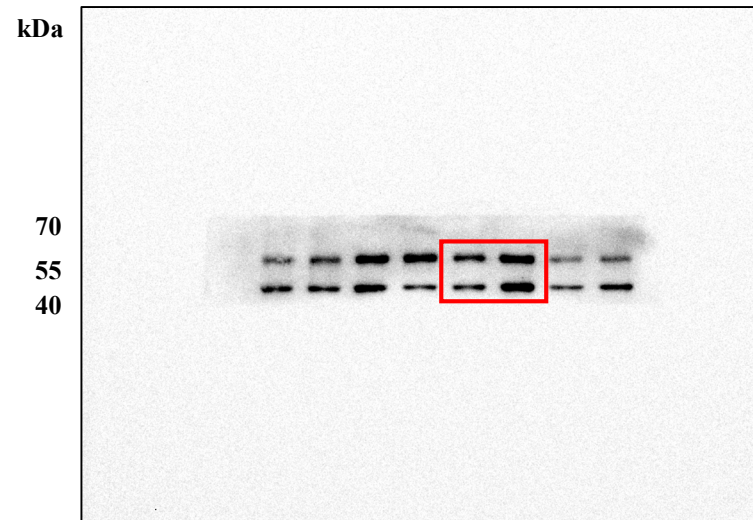

Anti-p- JNK(Thr183 / Tyr185)

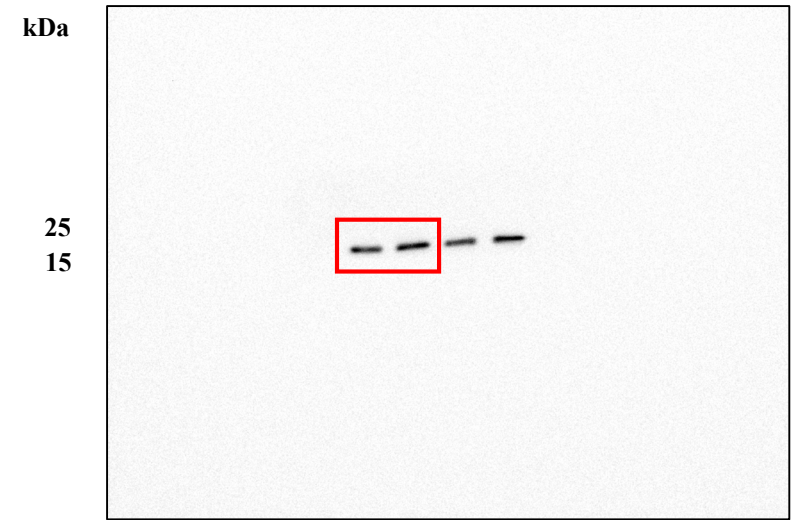

Anti-BAX

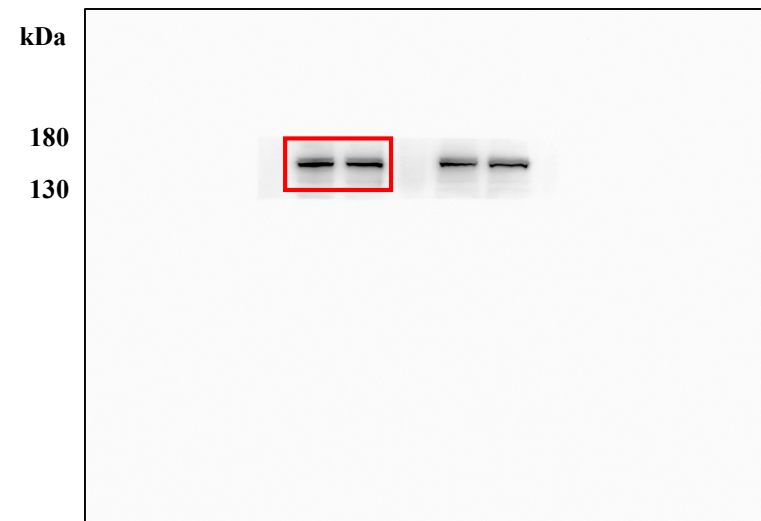

Anti-T-ASK1

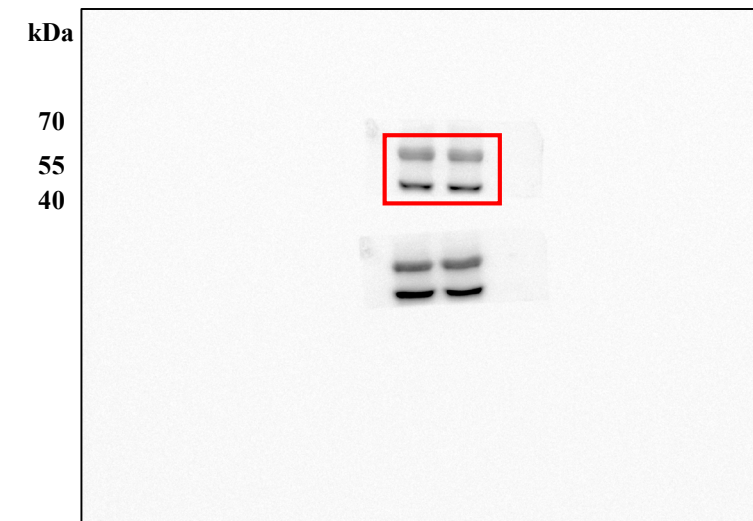

Anti-T- JNK

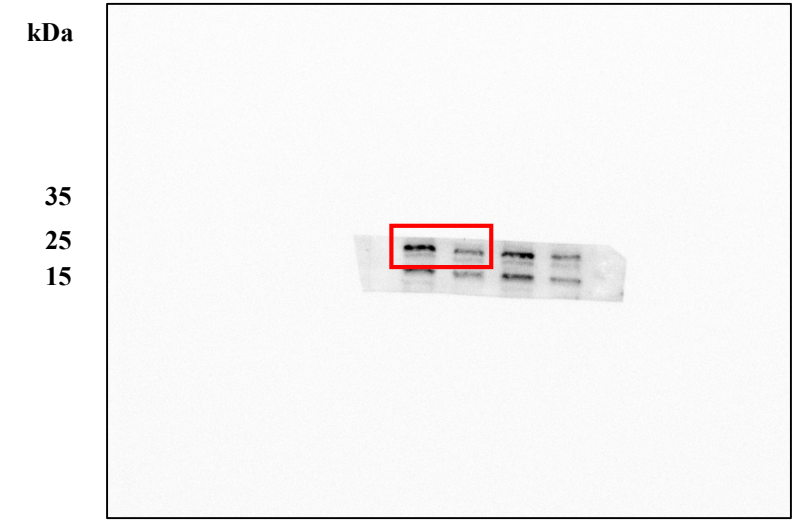

Anti-BCL-2



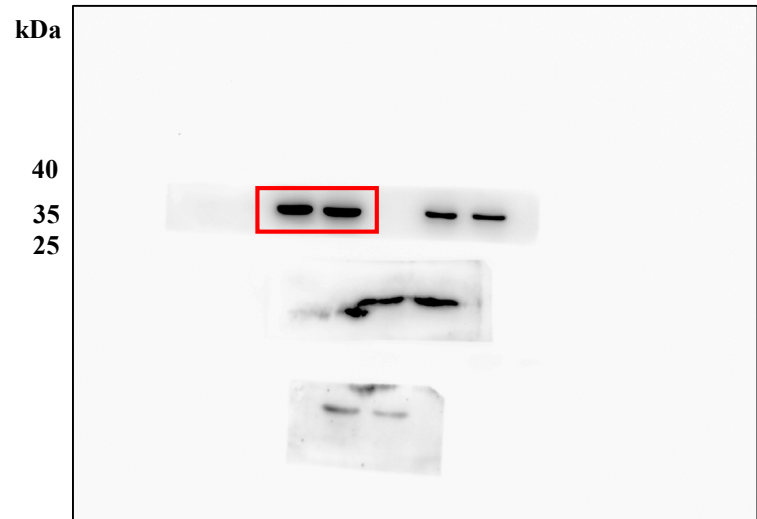

Anti-GAPDH

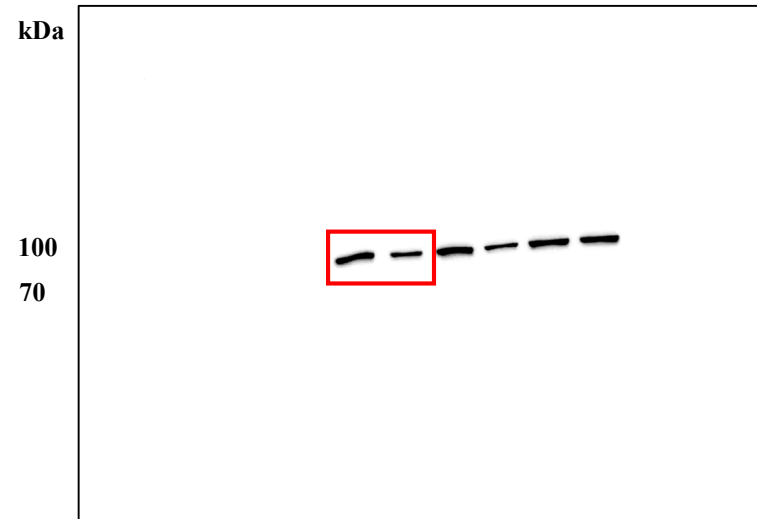

Anti-HSP90AA1

## H. Full unedited blots for Fig.5e HCT116

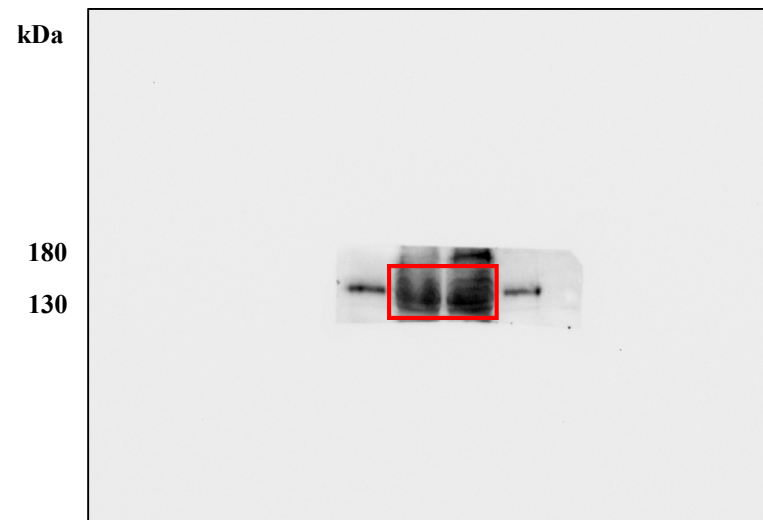

Anti-p-ASK1(Thr845)

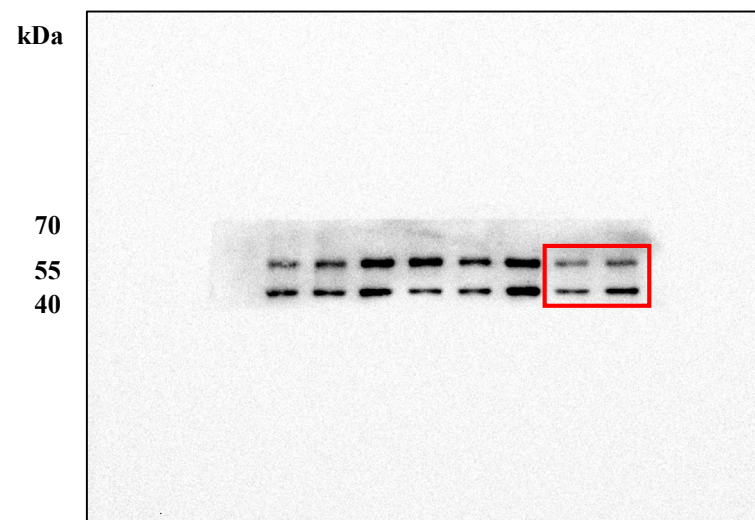

Anti-p- JNK(Thr183 / Tyr185)

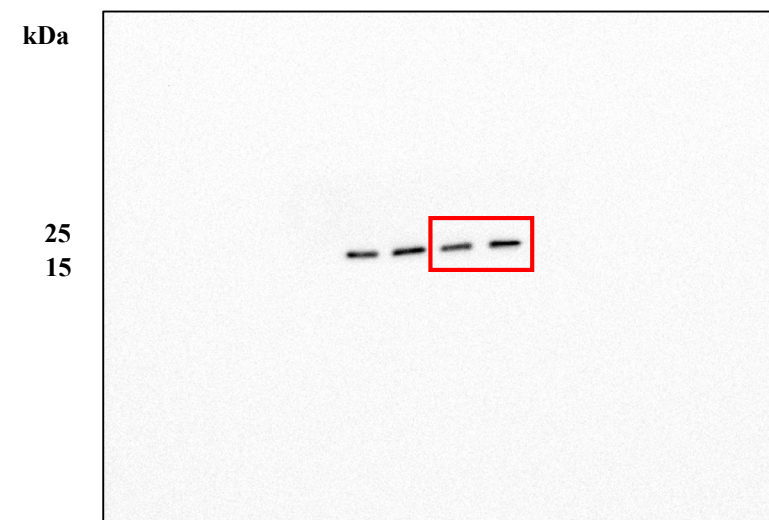

Anti-BAX

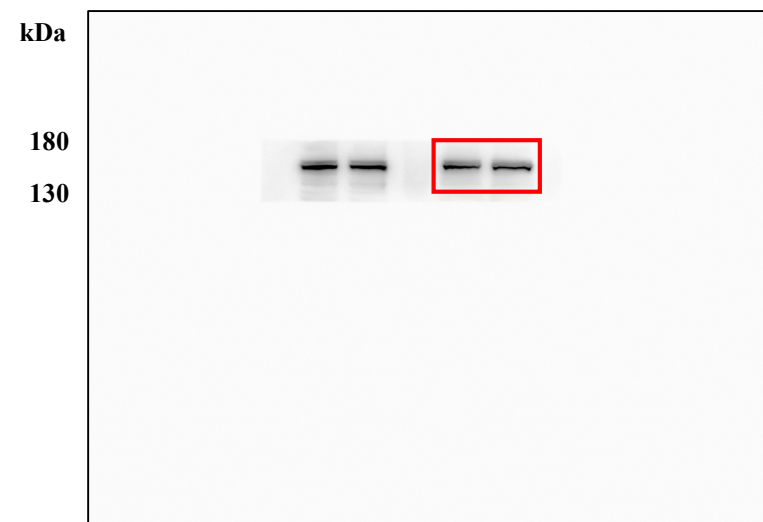

Anti-T-ASK1

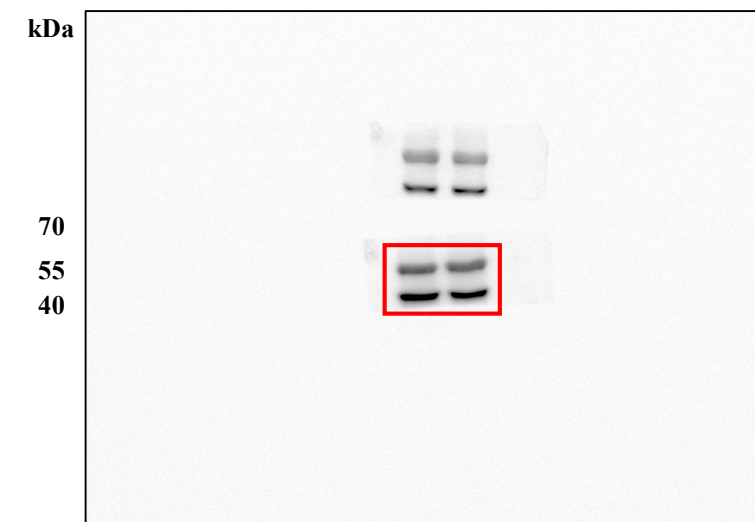

Anti-T- JNK

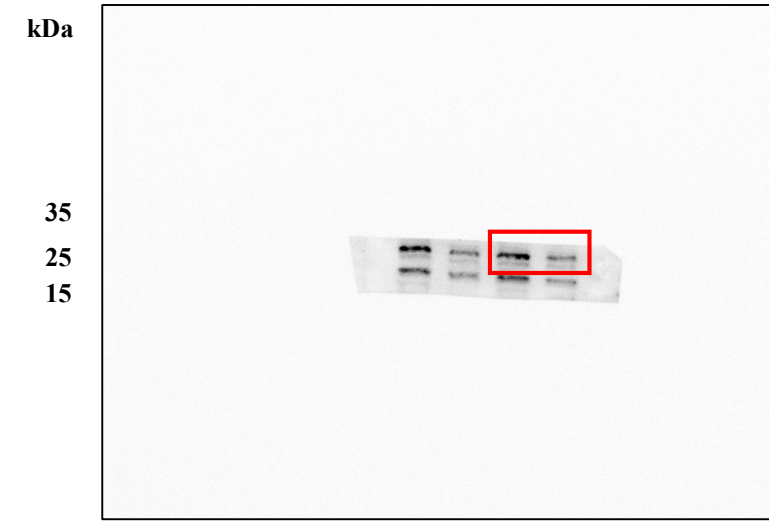

Anti-BCL-2

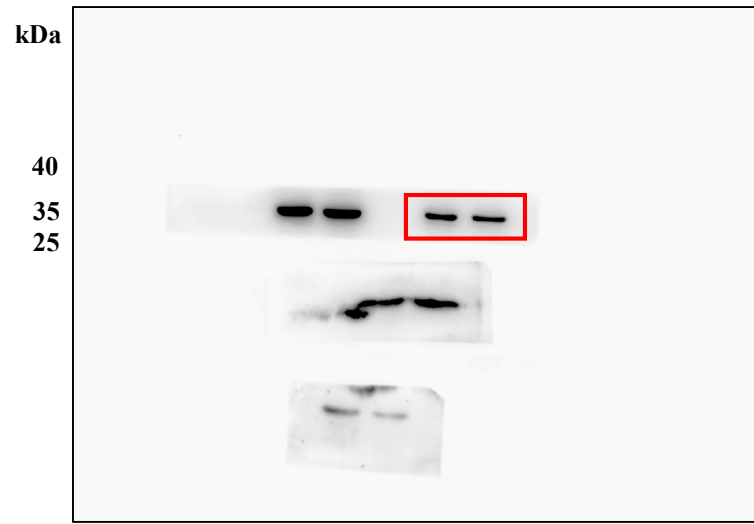

Anti-GAPDH

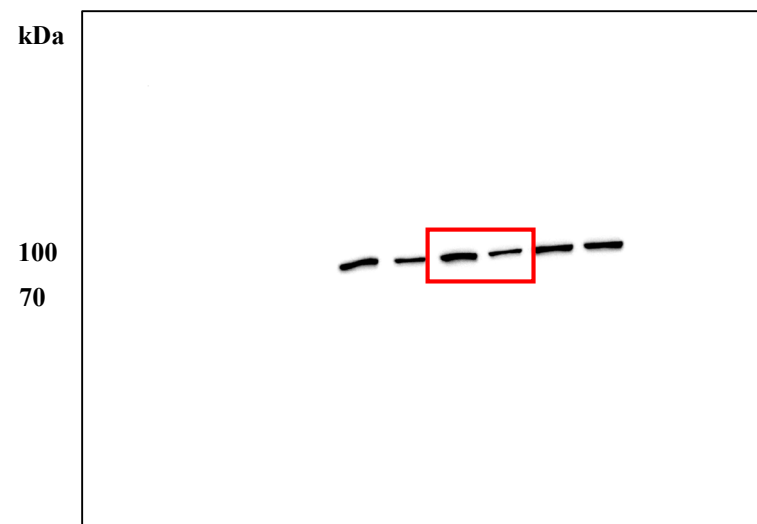

Anti-HSP90AA1

**Sup H. Full unedited blots for Fig.5e**

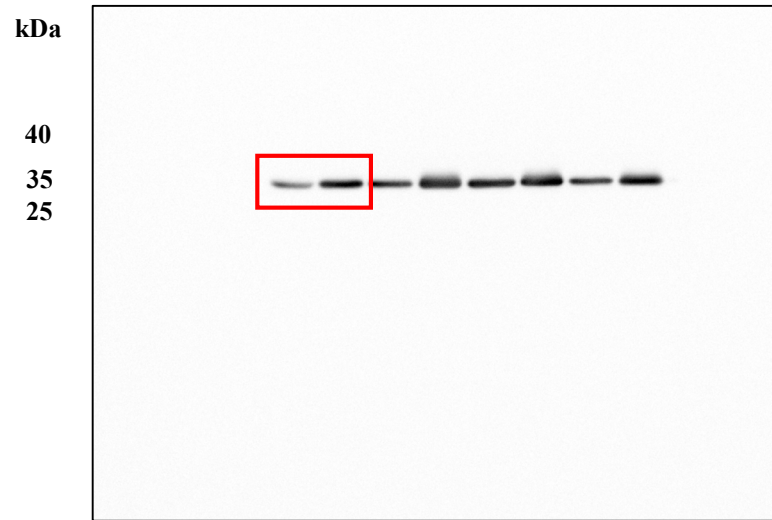

**HT29 Anti-BAX**

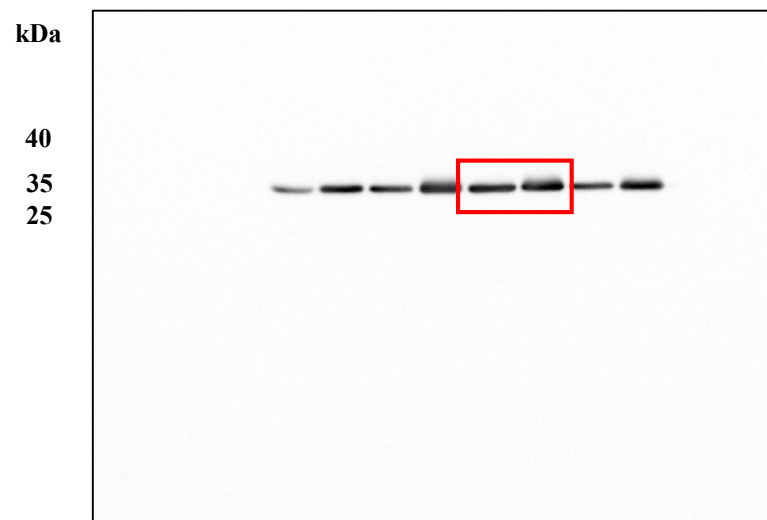

**HCT116 Anti-BAX**

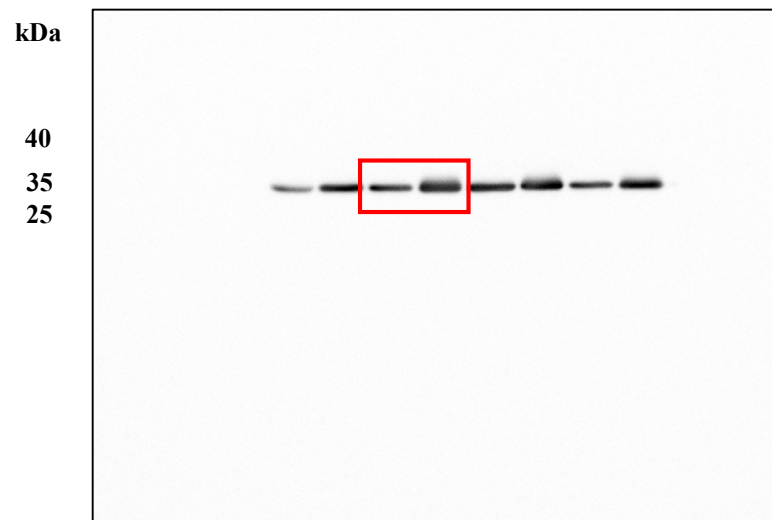

**HT29 Anti-BAX**

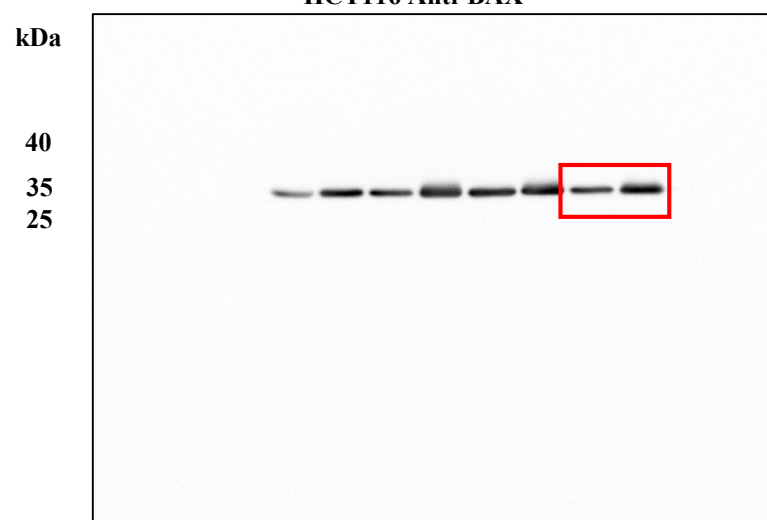

**HCT116 Anti-BAX**

**Sup H. Full unedited blots for Fig.5e**

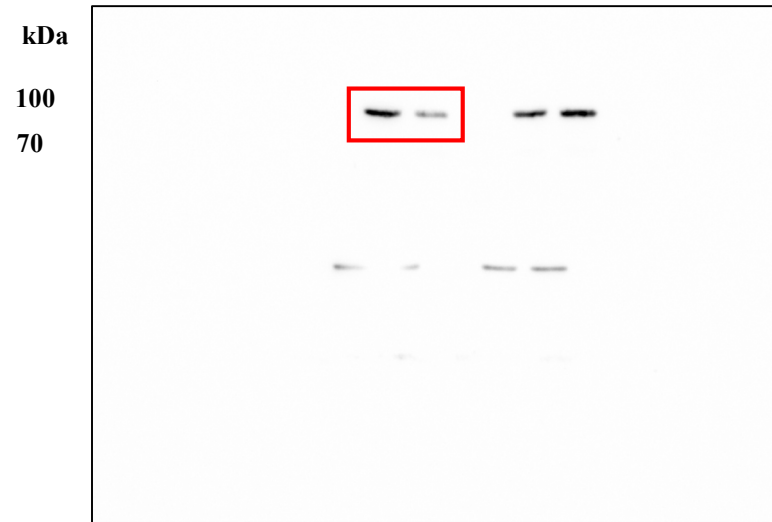

**HT29 Anti-HSP90AA1**

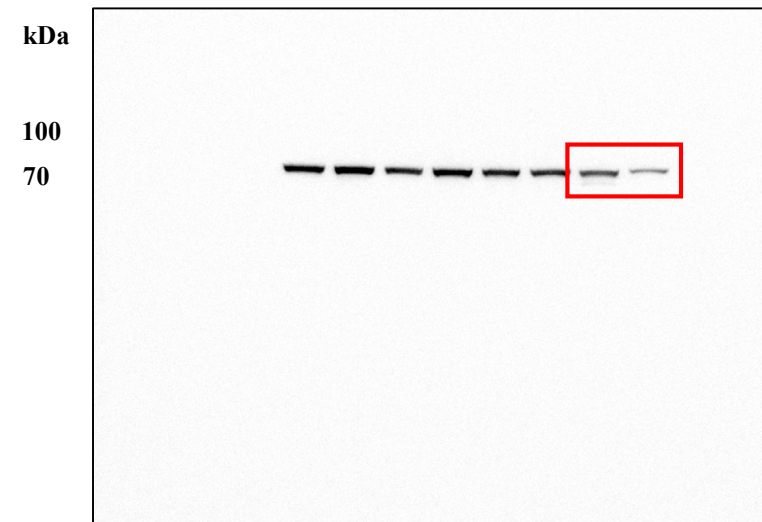

**HCT116 Anti-HSP90AA1**

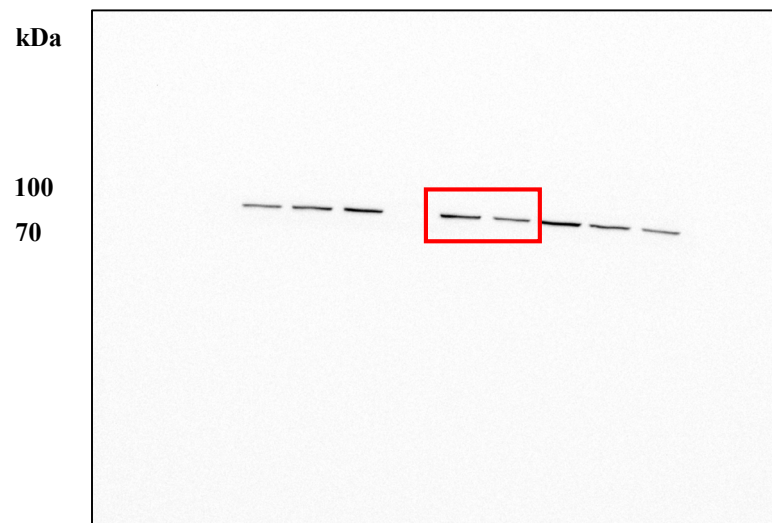

**HT29 Anti-HSP90AA1**

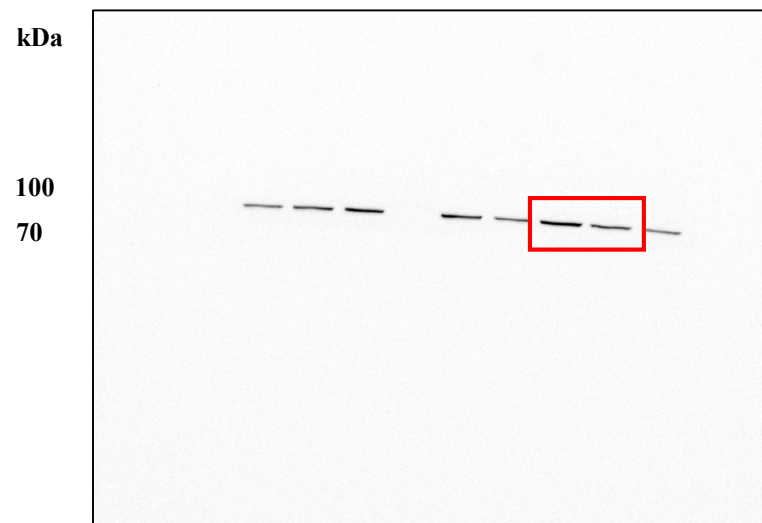

**HCT116 Anti-HSP90AA1**

# I. Full unedited blots for Fig.5f HT29

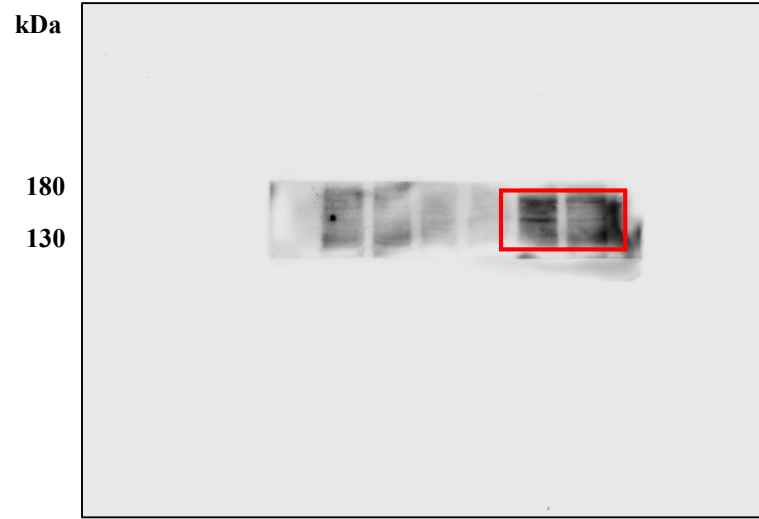

Anti-p-ASK1(Thr845)

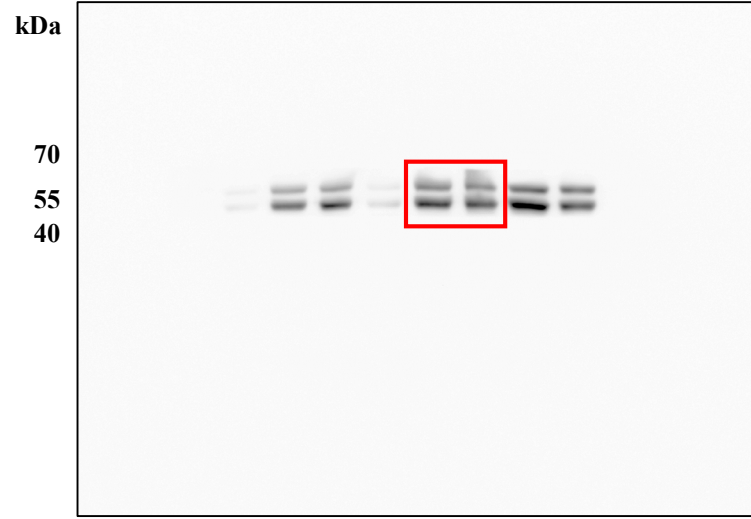

Anti-p- JNK(Thr183 / Tyr185)

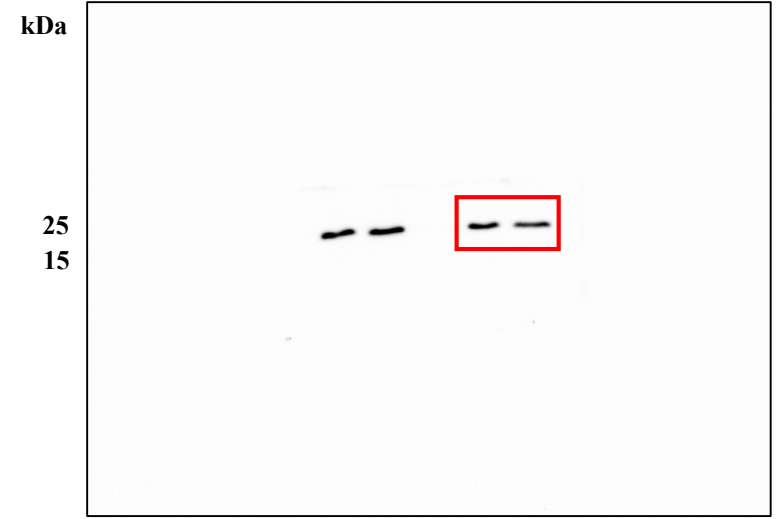

Anti-BAX

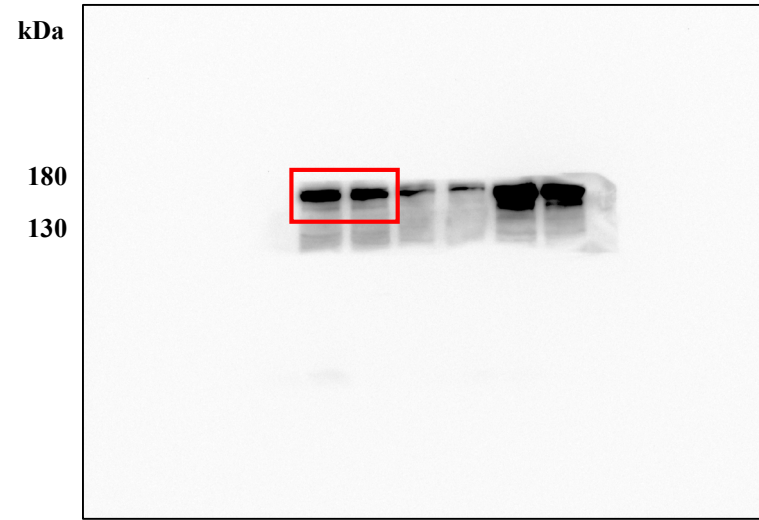

Anti-T-ASK1

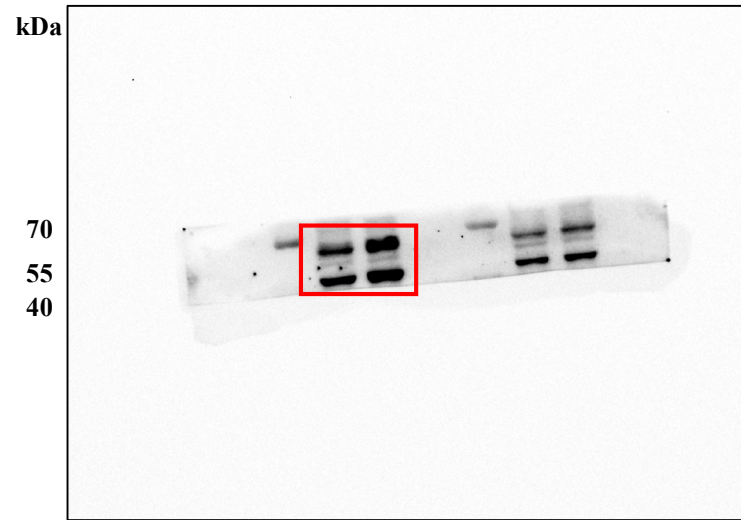

Anti-T- JNK

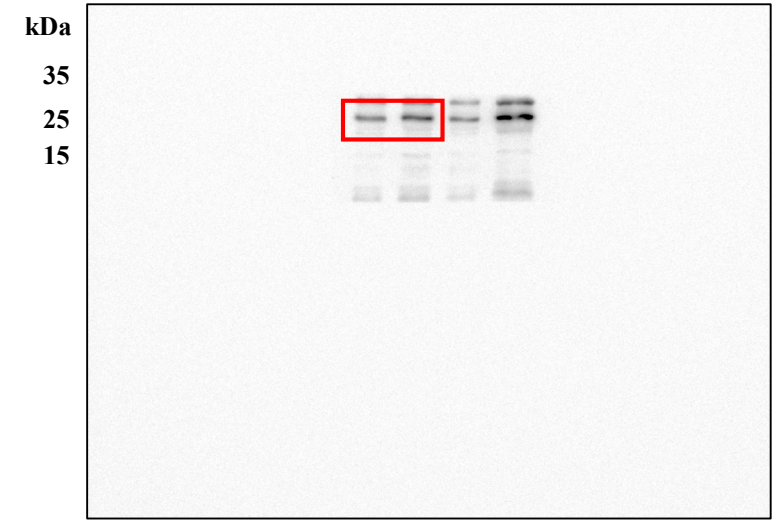

Anti-BCL-2

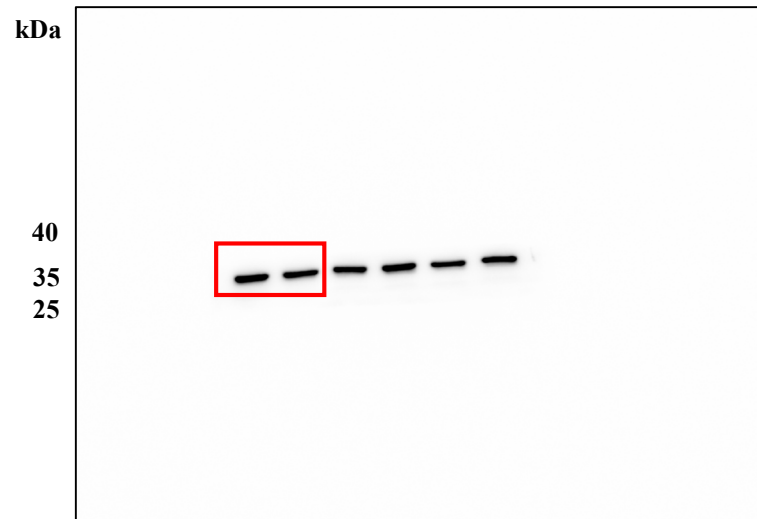

Anti-GAPDH

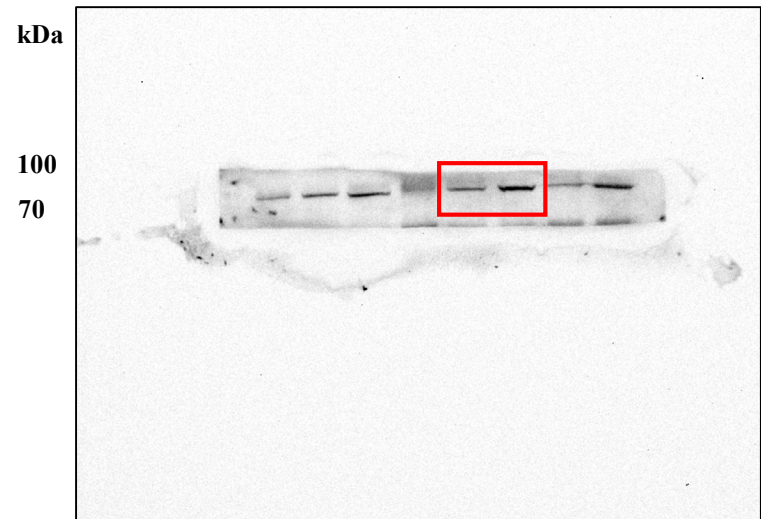

Anti-HSP90AA1

# I. Full unedited blots for Fig.5f HCT116

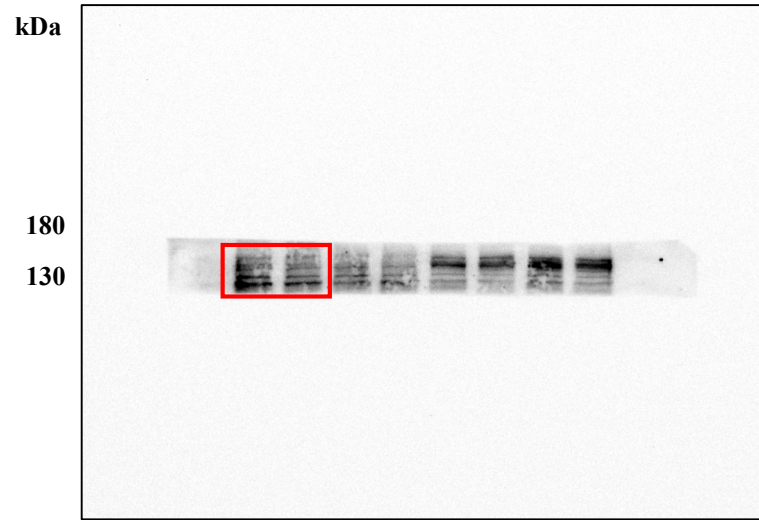

Anti-p-ASK1(Thr845)

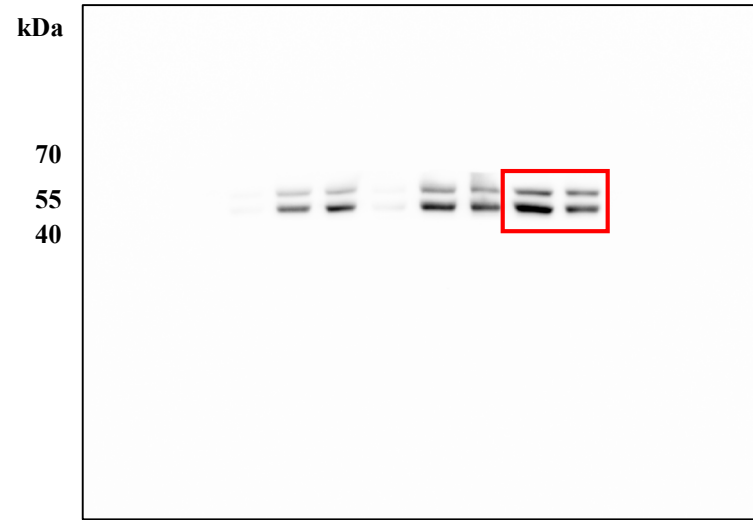

Anti-p- JNK(Thr183 / Tyr185)

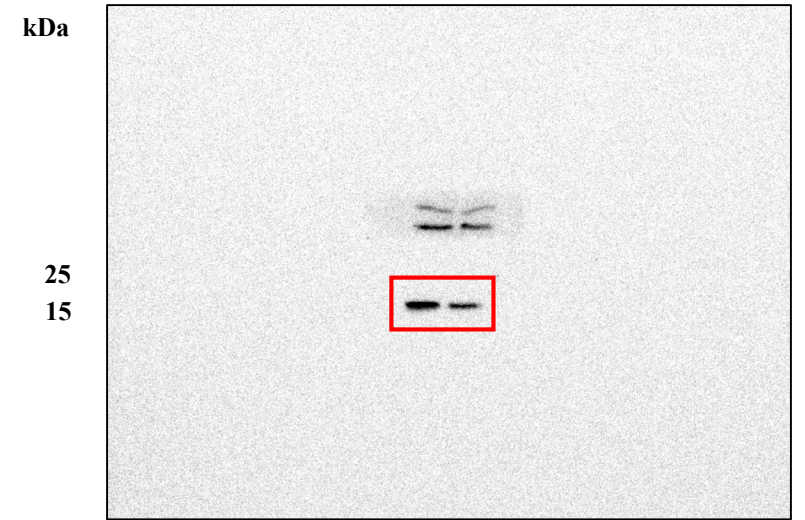

Anti-BAX

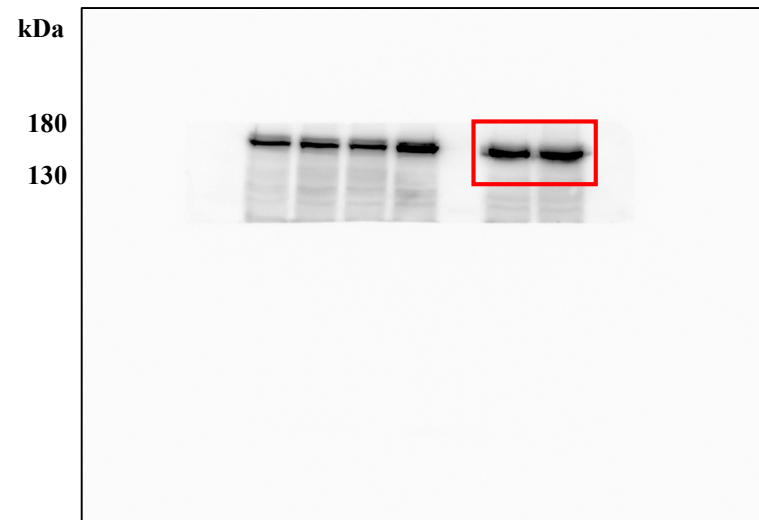

Anti-T-ASK1

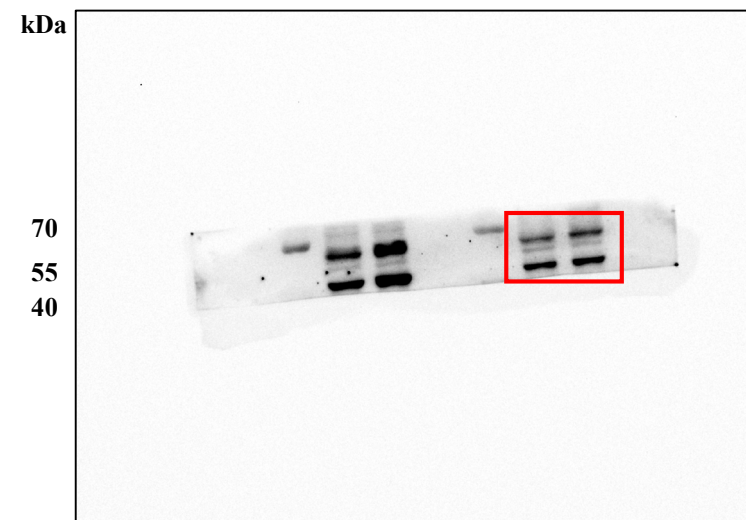

Anti-T- JNK

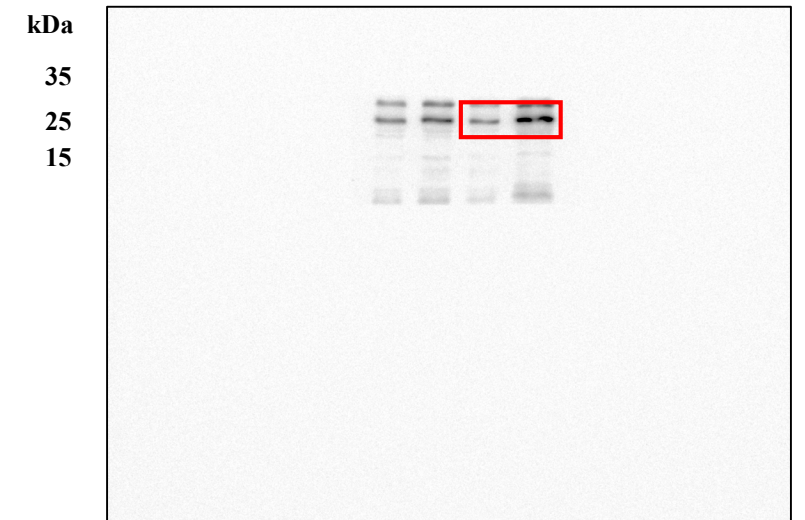

Anti-BCL-2



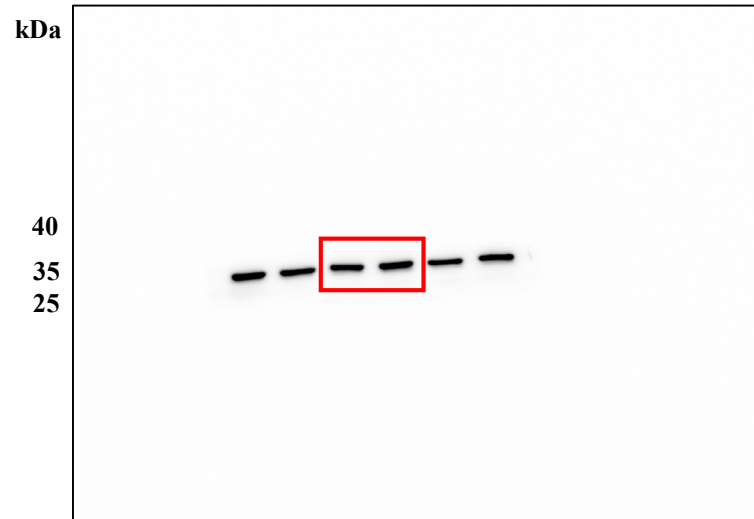

Anti-GAPDH

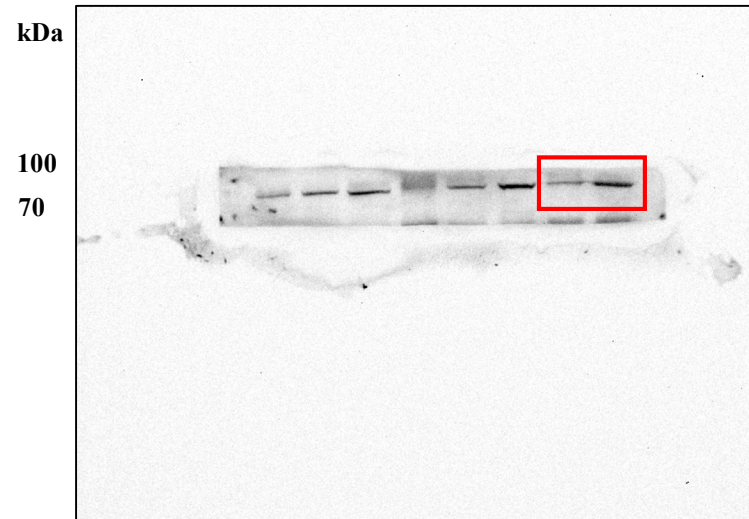

Anti-HSP90AA1

**Sup I. Full unedited blots for Fig.5f**

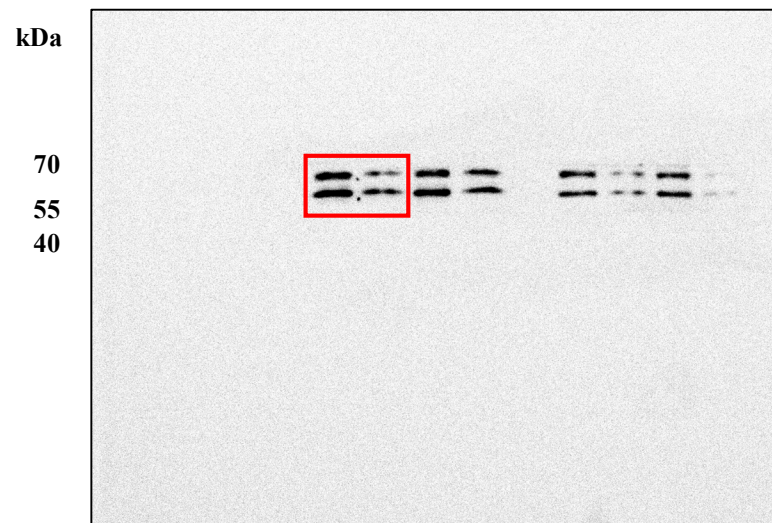

**HT29 Anti-p- JNK(Thr183 / Tyr185)**

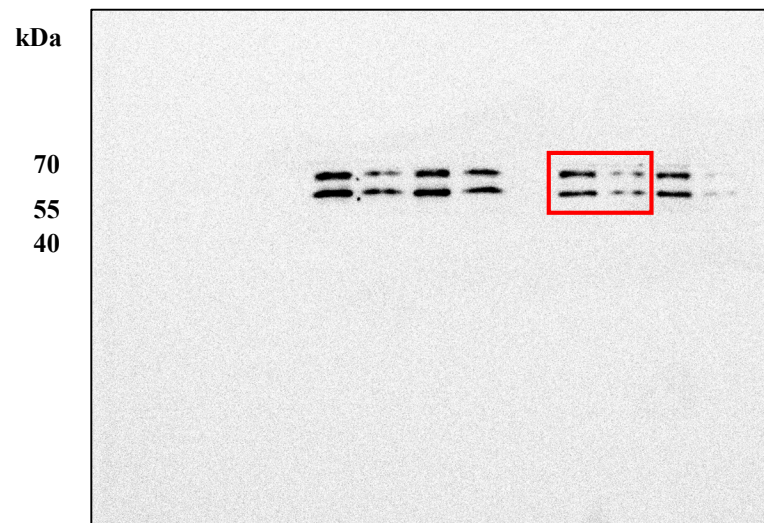

**HCT116 Anti-p- JNK(Thr183 / Tyr185)**

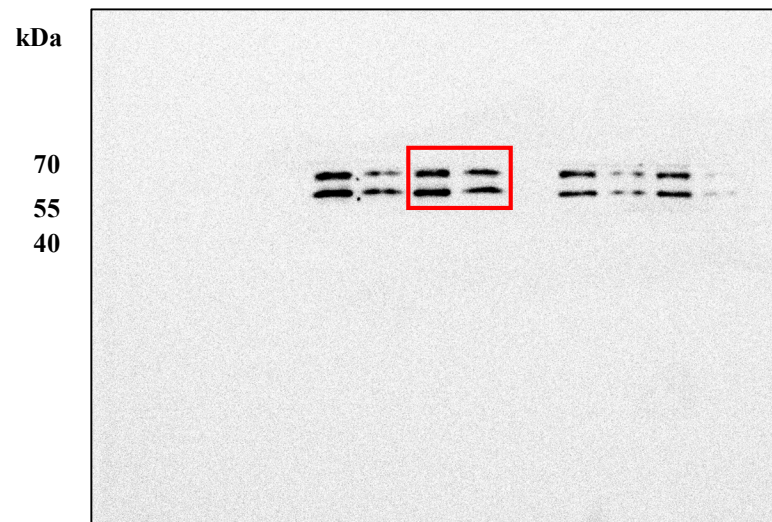

**HT29 Anti-p- JNK(Thr183 / Tyr185)**

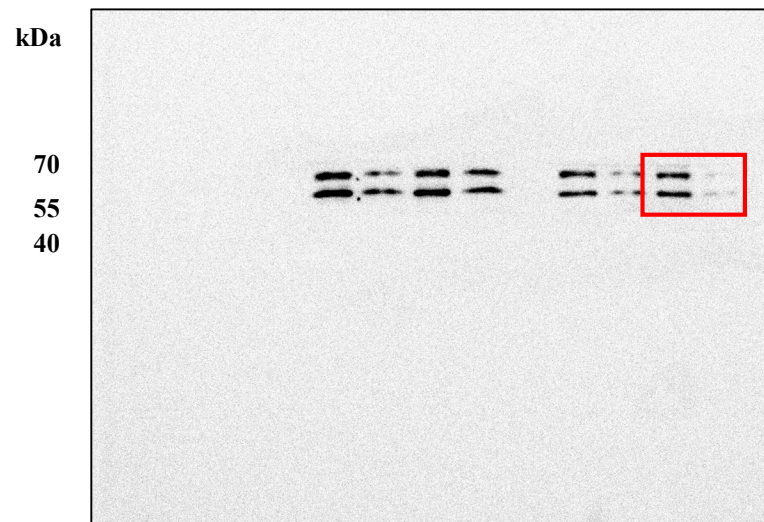

**HCT116 Anti-p- JNK(Thr183 / Tyr185)**

**Sup I. Full unedited blots for Fig.5f**

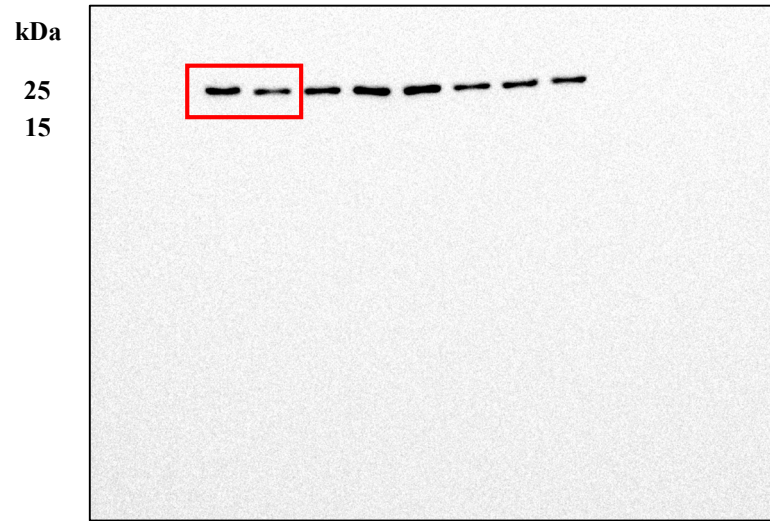

**HT29 Anti-BAX**

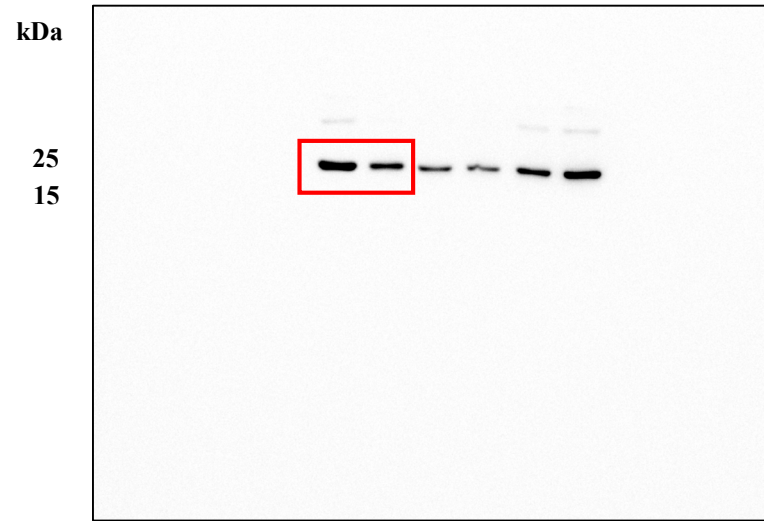

**HCT116 Anti-BAX**

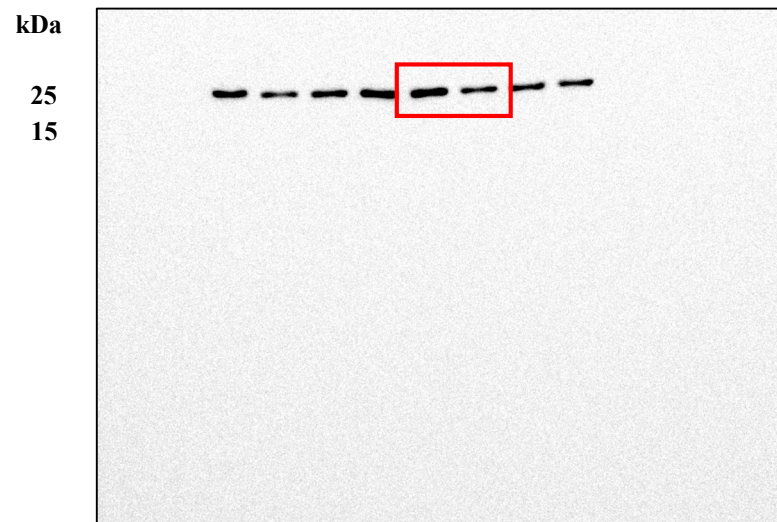

**HT29 Anti-BAX**

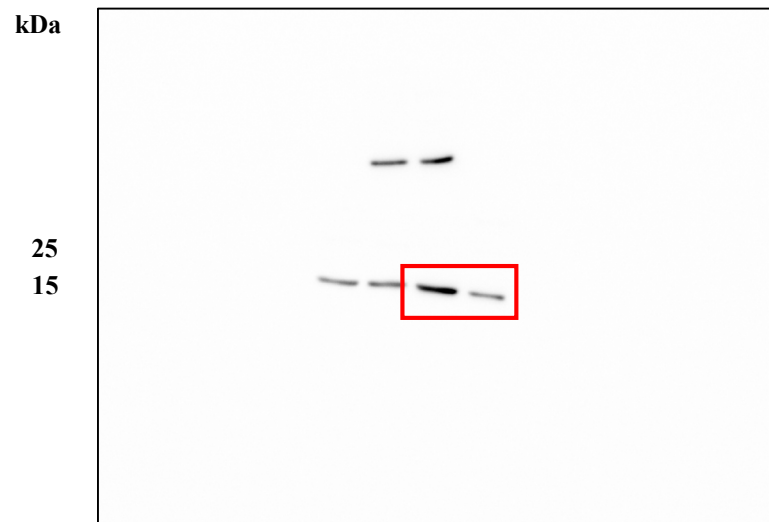

**HCT116 Anti-BAX**

**Sup I. Full unedited blots for Fig.5f**

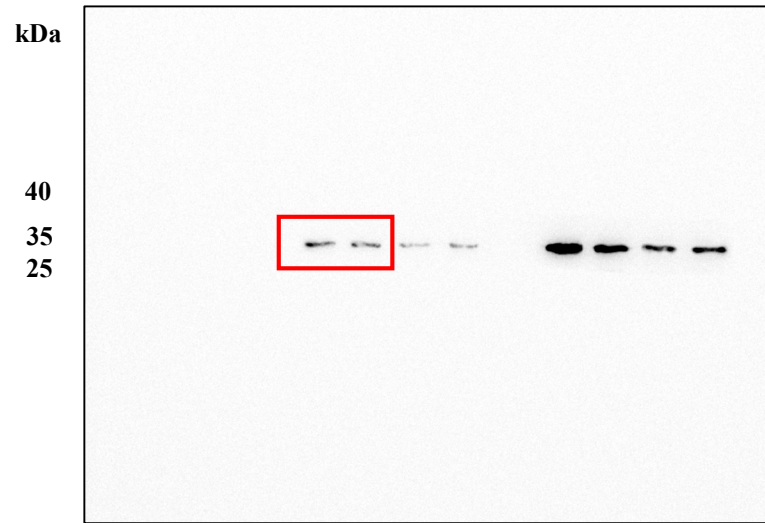

**HT29 Anti-GAPDH**

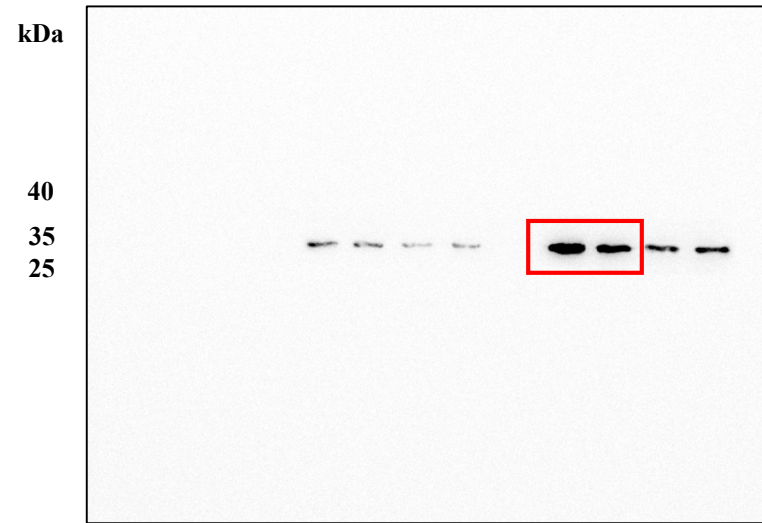

**HCT116 Anti-GAPDH**

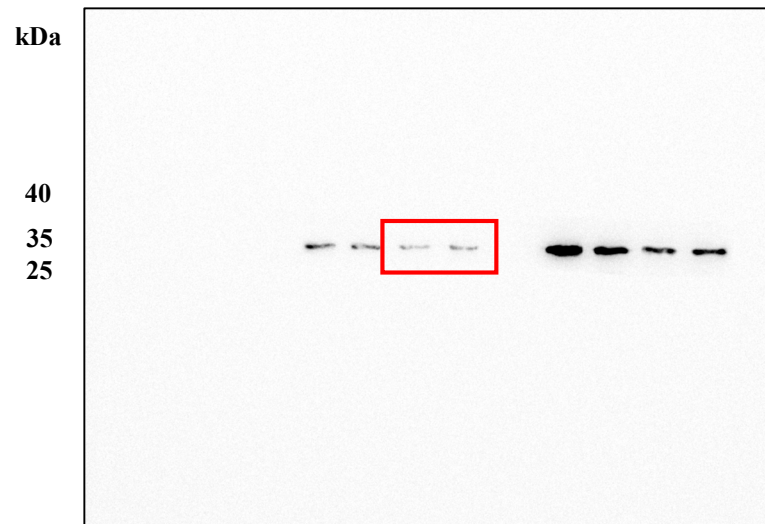

**HT29 Anti-GAPDH**

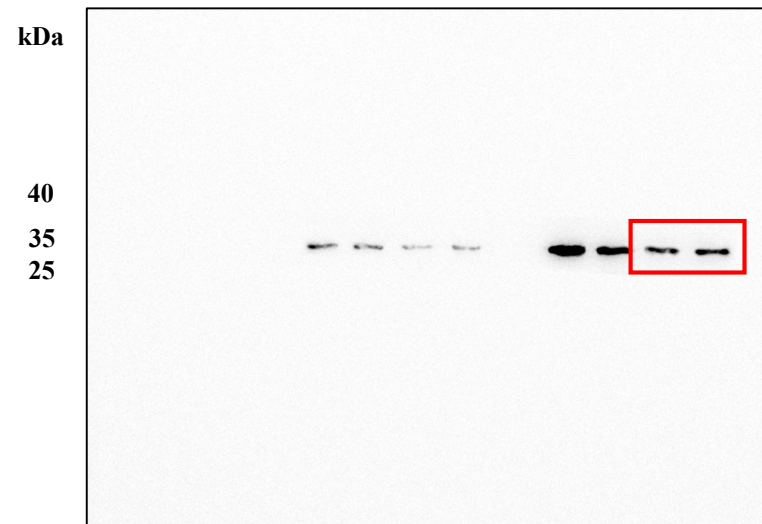

**HCT116 Anti-GAPDH**

**J. Full unedited blots for Fig.5g HT29(si#1)**

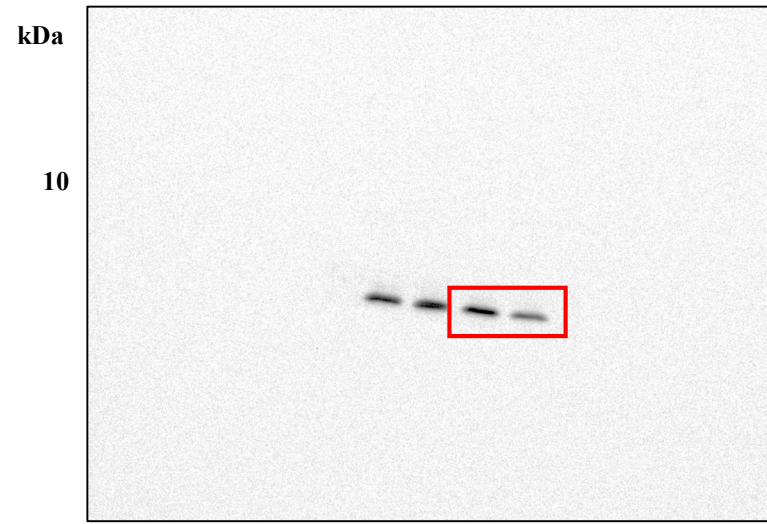

**Anti-SRP9**

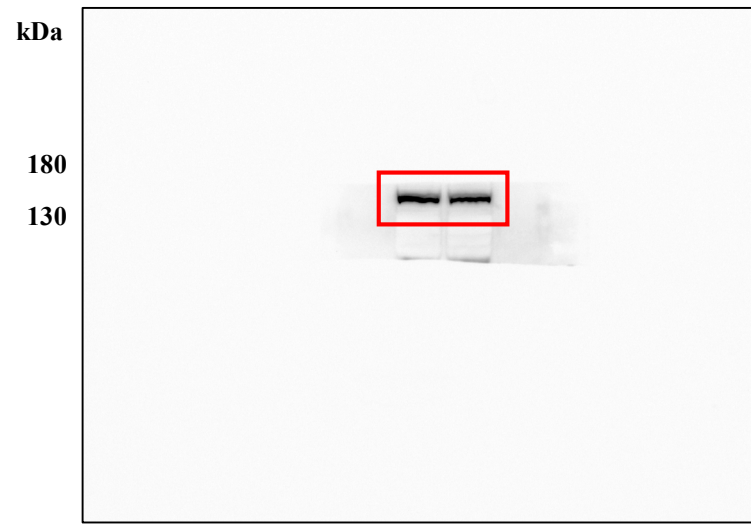

**Anti-T-ASK1**

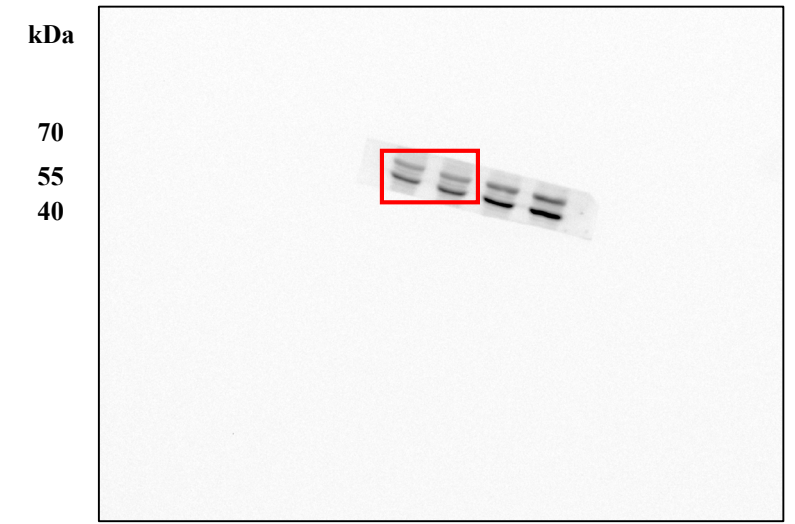

**Anti-T- JNK**

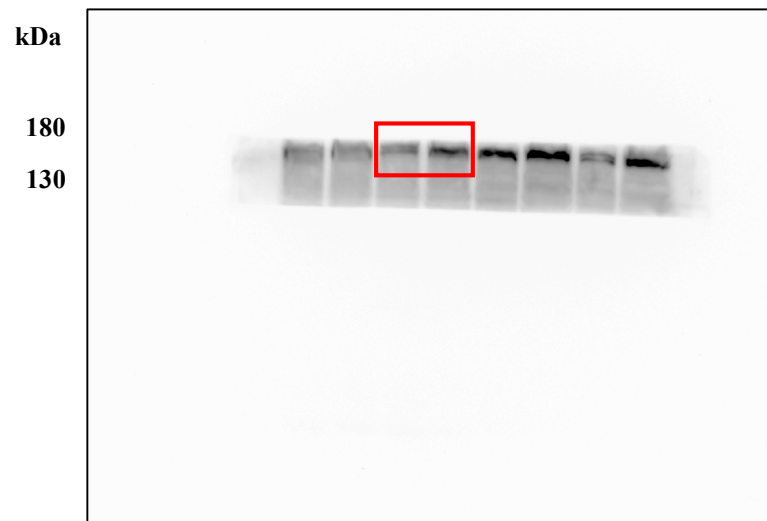

**Anti-p-ASK1(Thr845)**

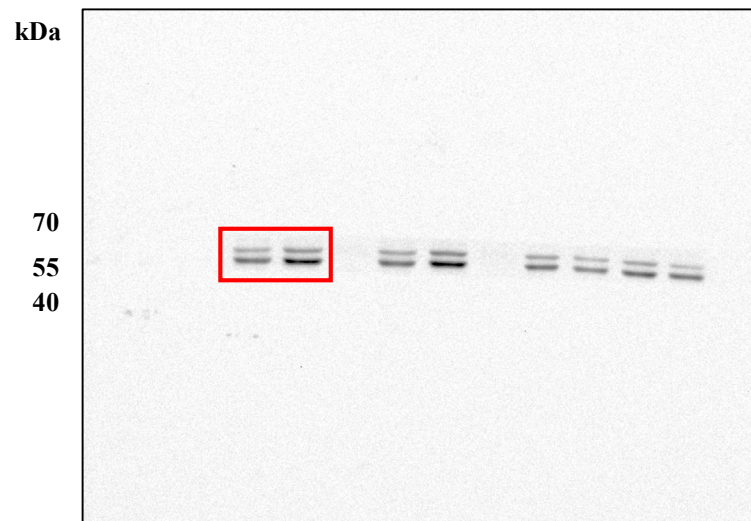

**Anti-p- JNK(Thr183 / Tyr185)**

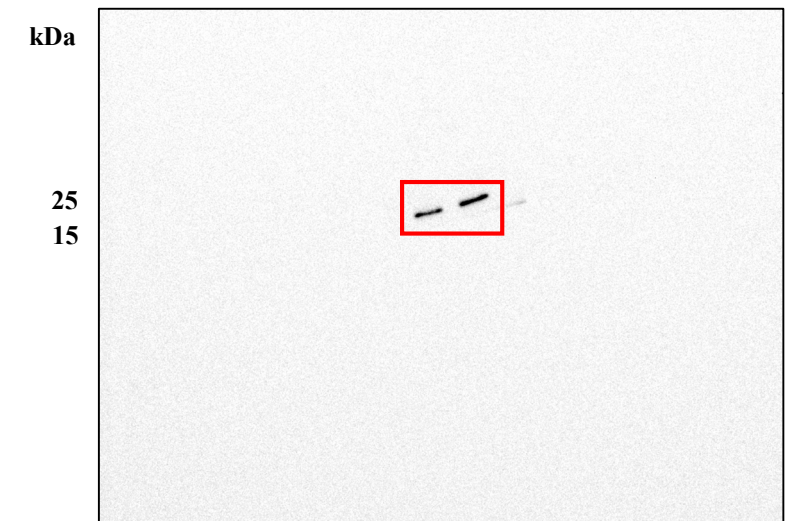

**Anti-BAX**

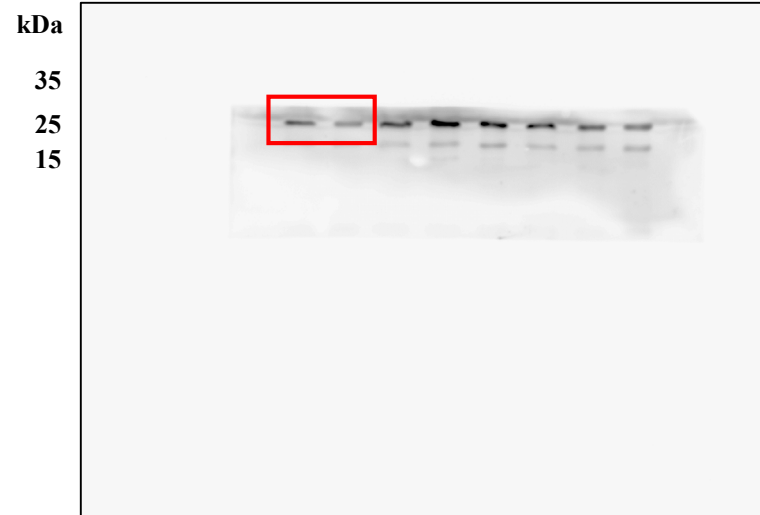

Anti-BCL-2

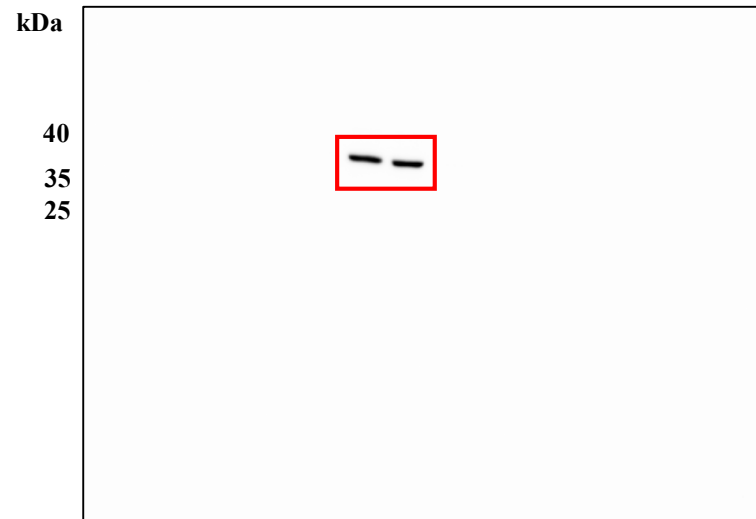

Anti-GAPDH

**J. Full unedited blots for Fig.5g HCT116 (si#1)**

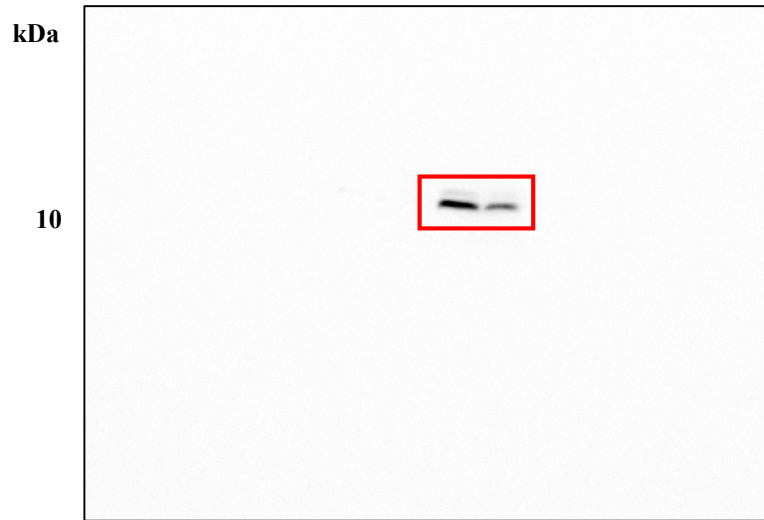

**Anti-SRP9**

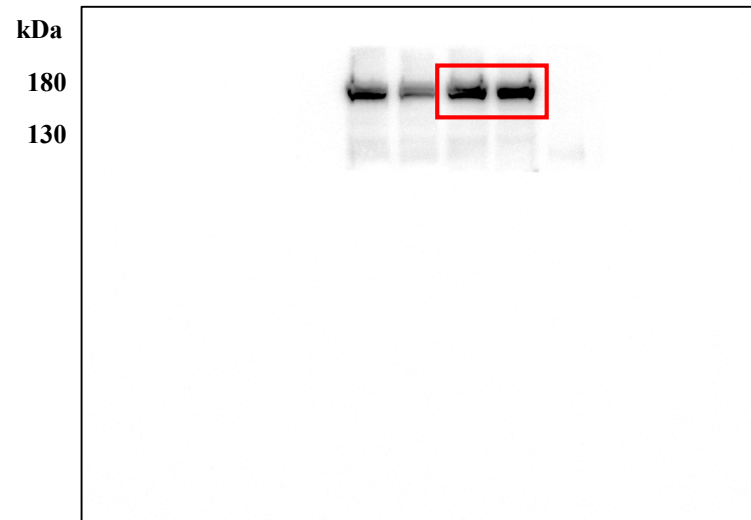

**Anti-T-ASK1**

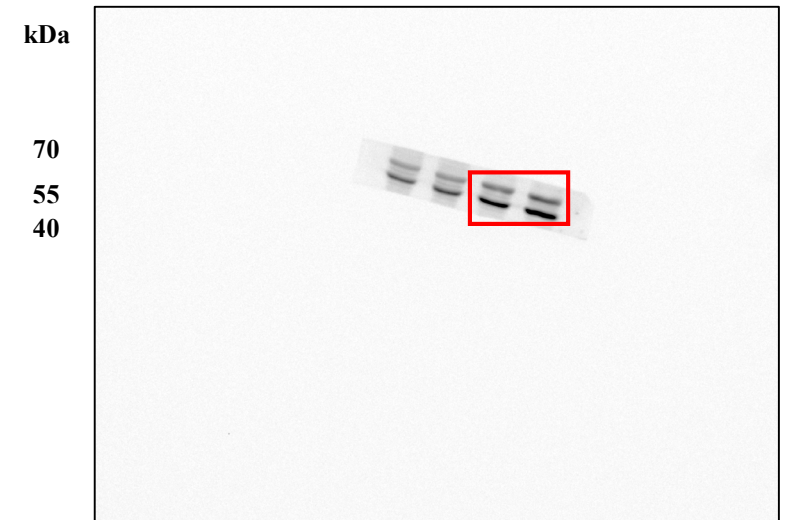

**Anti-T- JNK**

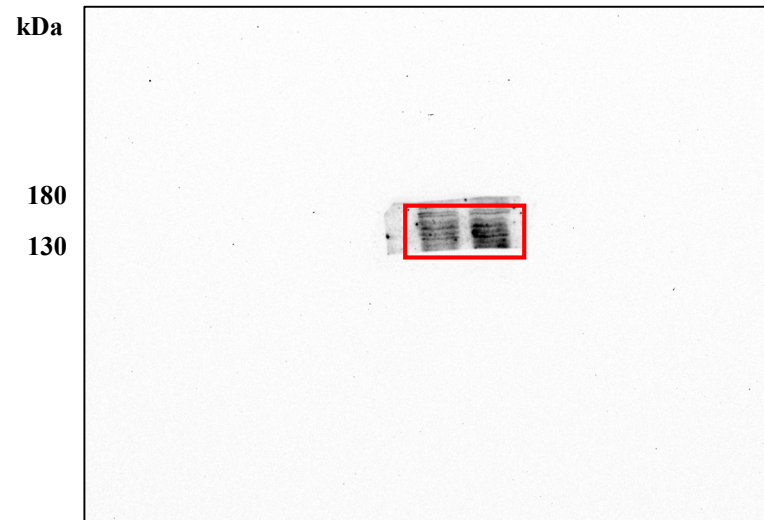

**Anti-p-ASK1(Thr845)**

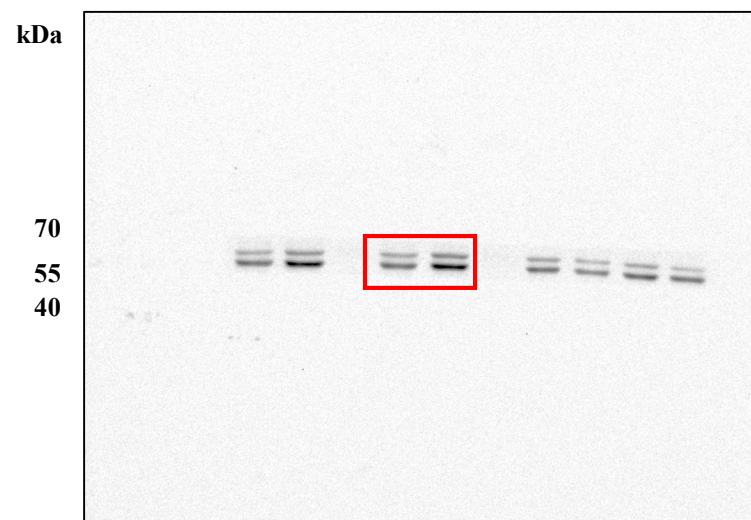

**Anti-p- JNK(Thr183 / Tyr185)**

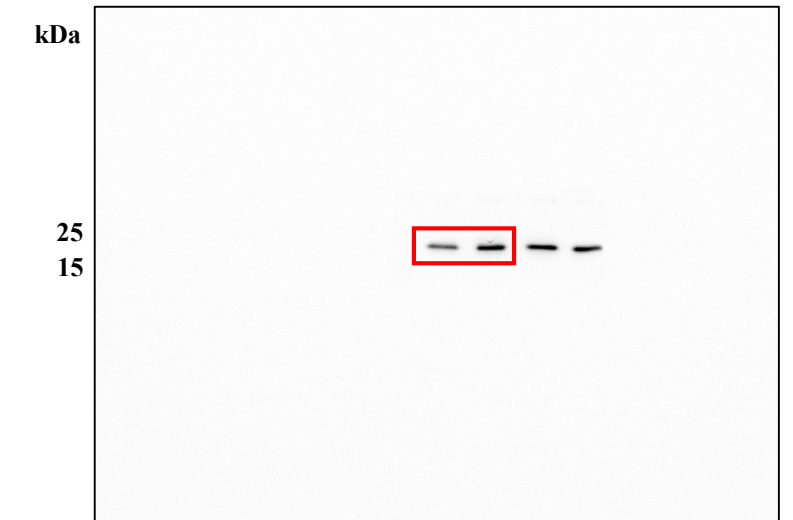

**Anti-BAX**

kDa

35  
25  
15

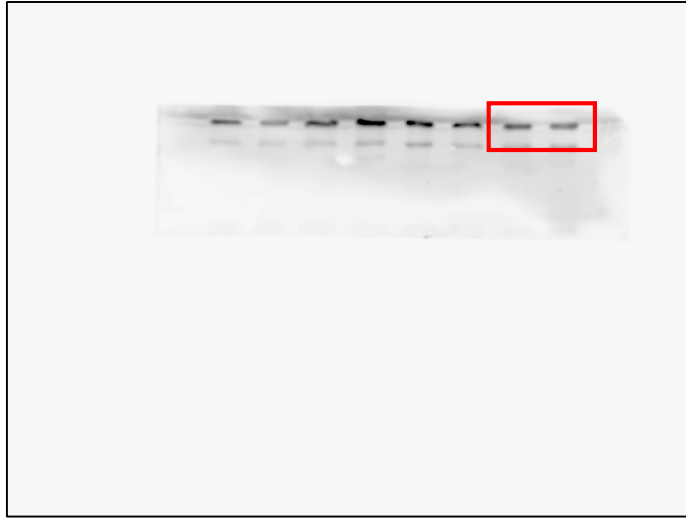

Anti-BCL-2

kDa

40  
35  
25

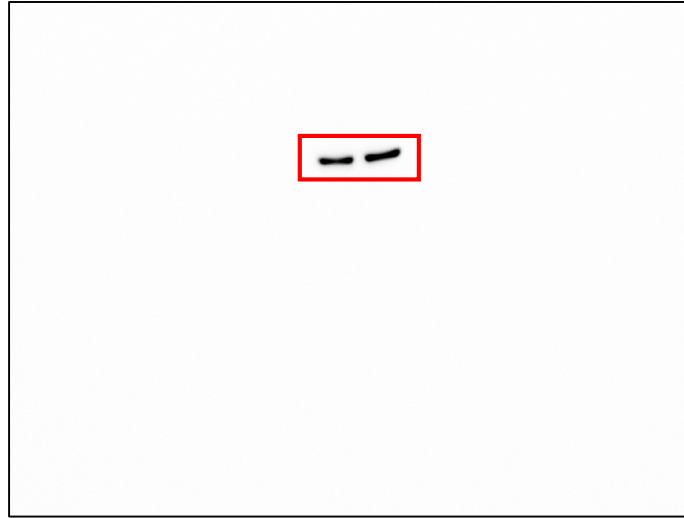

Anti-GAPDH



**Sup J. Full unedited blots for Fig.5g (si#1)**

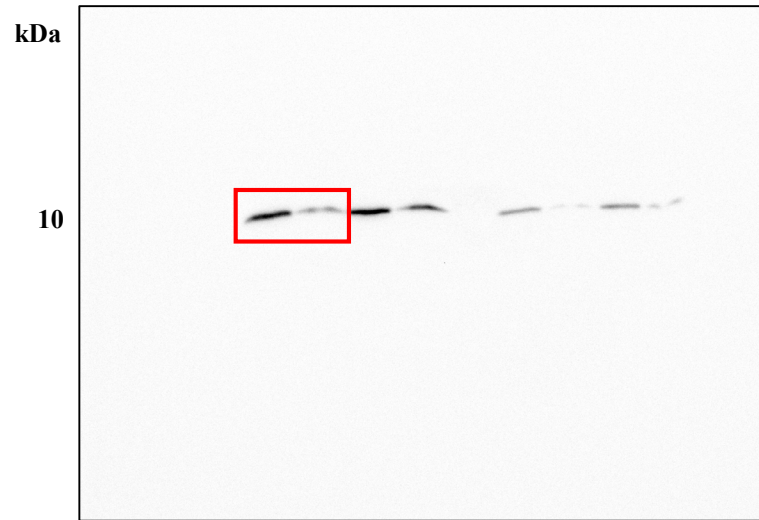

**HT29 Anti-SRP9**

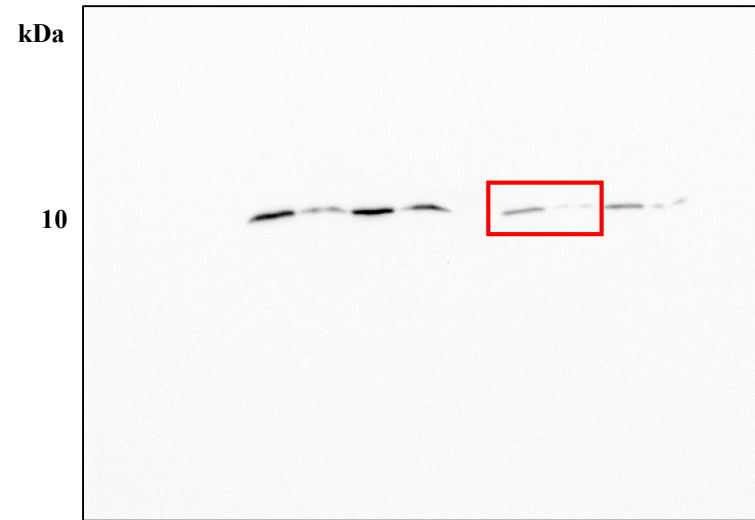

**HCT116 Anti-SRP9**

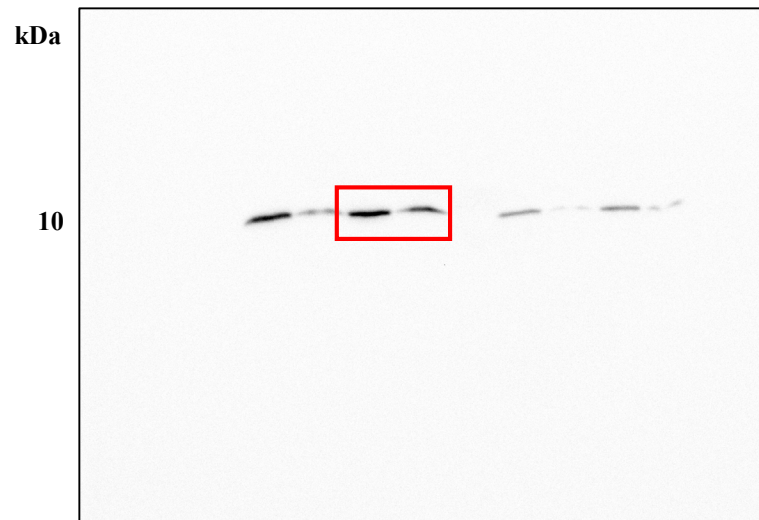

**HT29 Anti-SRP9**

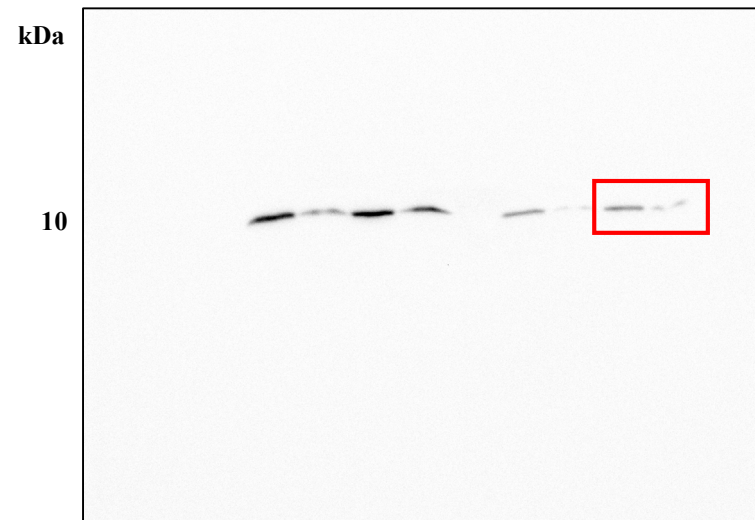

**HCT116 Anti-SRP9**

**Sup J. Full unedited blots for Fig.5g (si#1)**

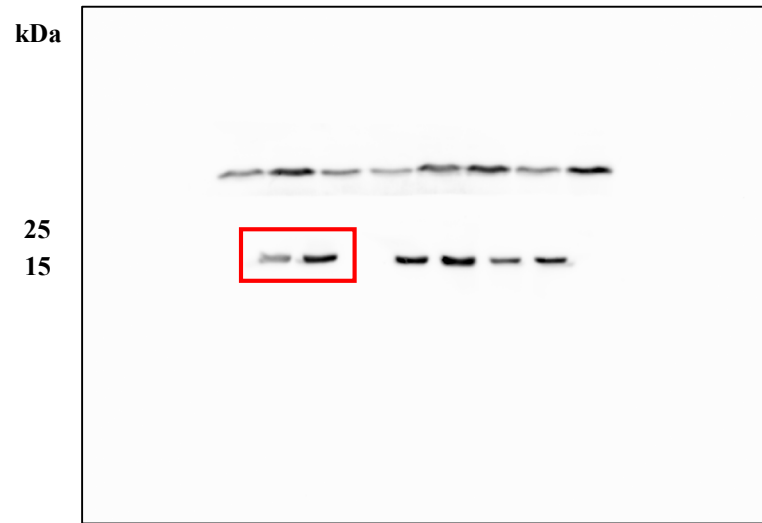

**HT29 Anti-BAX**

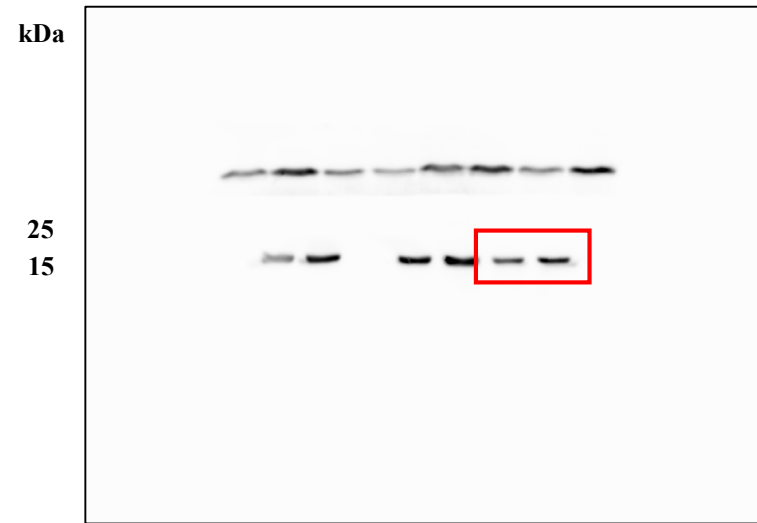

**HCT116 Anti-BAX**

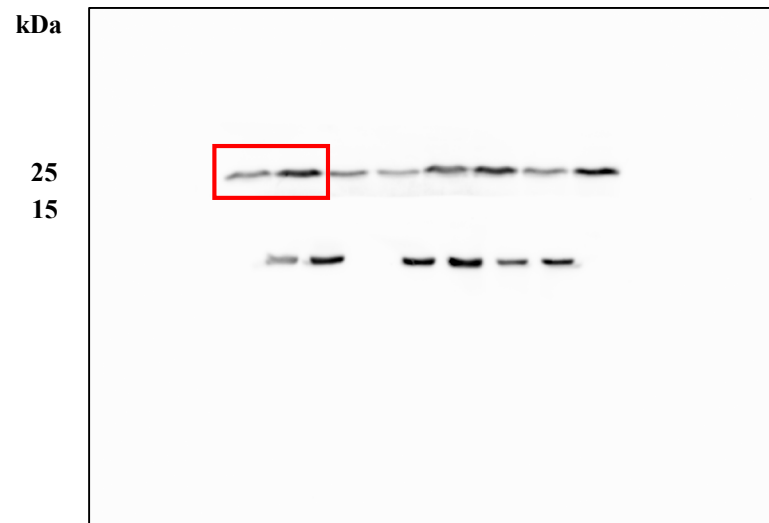

**HT29 Anti-BAX**

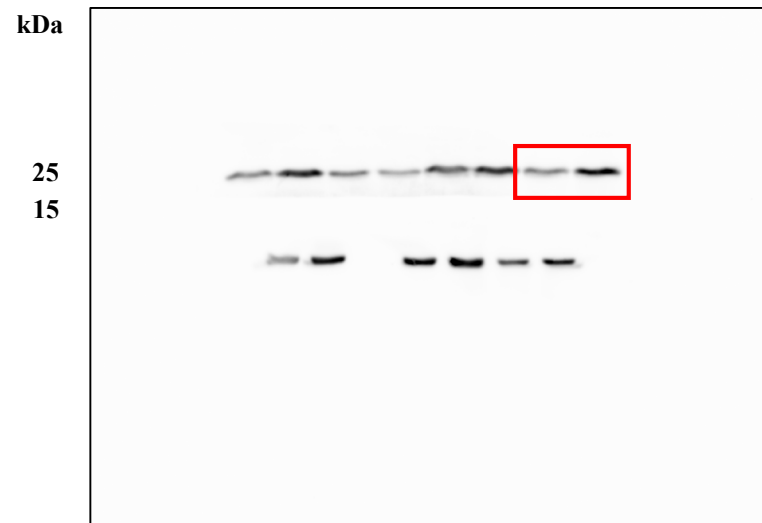

**HCT116 Anti-BAX**

**Sup J. Full unedited blots for Fig.5g (si#1)**

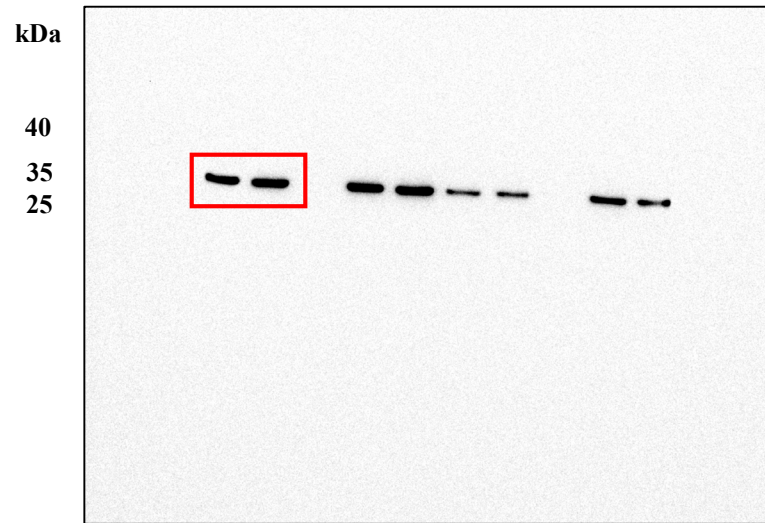

**HT29 Anti-GAPDH**

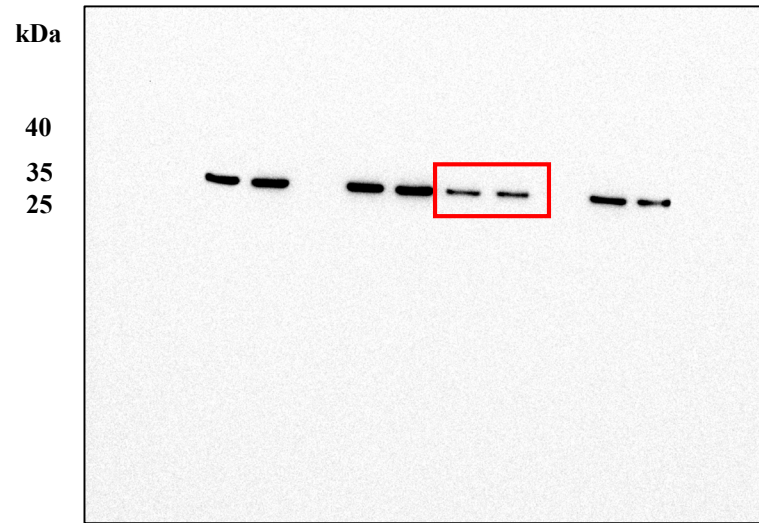

**HCT116 Anti-GAPDH**

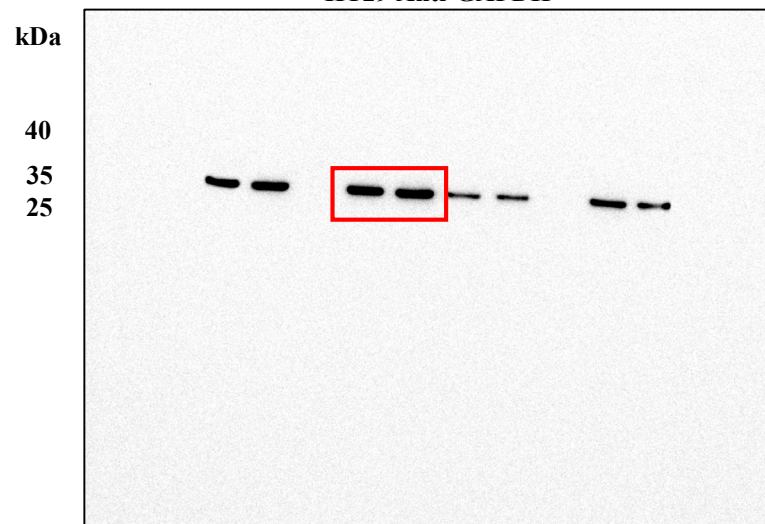

**HT29 Anti-GAPDH**

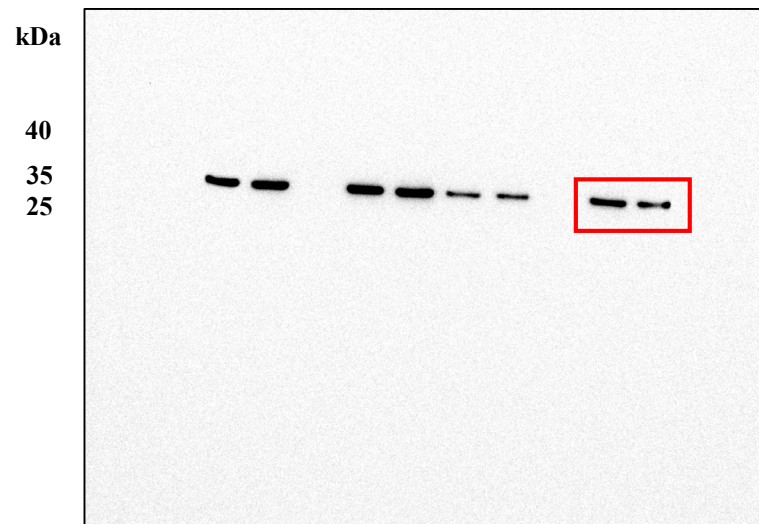

**HCT116 Anti-GAPDH**

**J. Full unedited blots for Fig.5g HT29(si#2)**

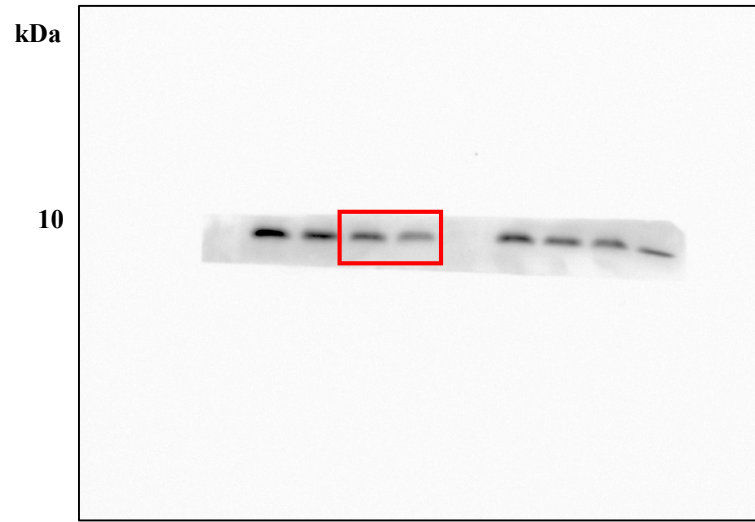

**Anti-SRP9**

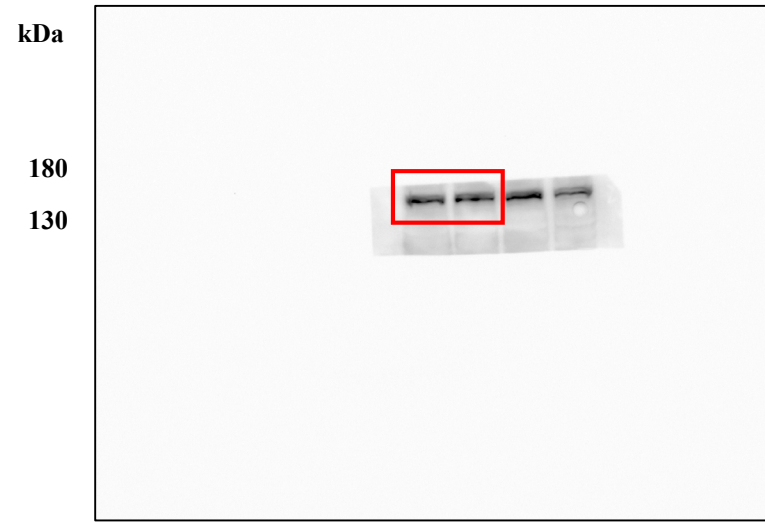

**Anti-T-ASK1**

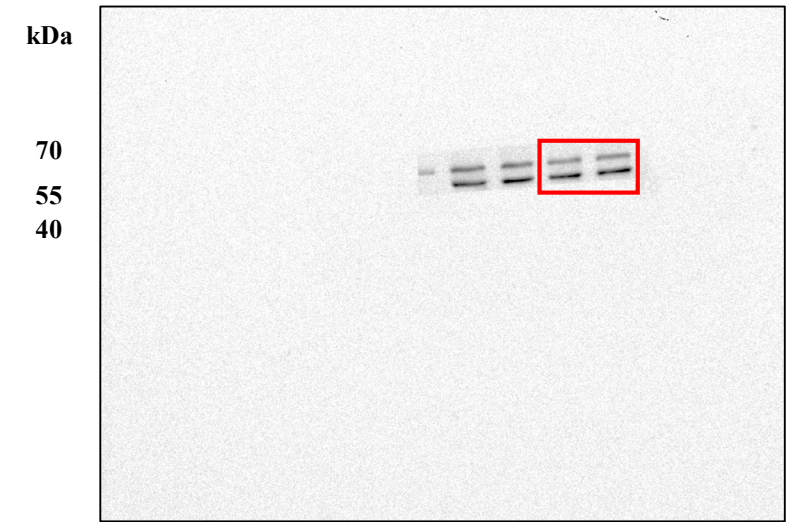

**Anti-T- JNK**

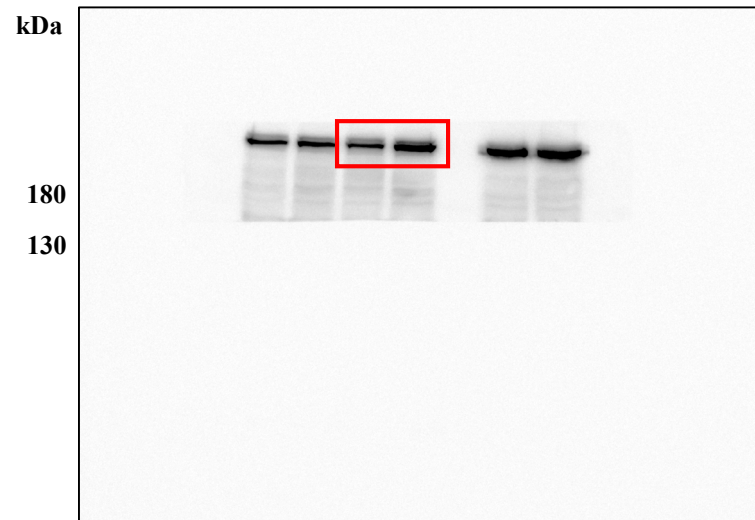

**Anti-p-ASK1(Thr845)**

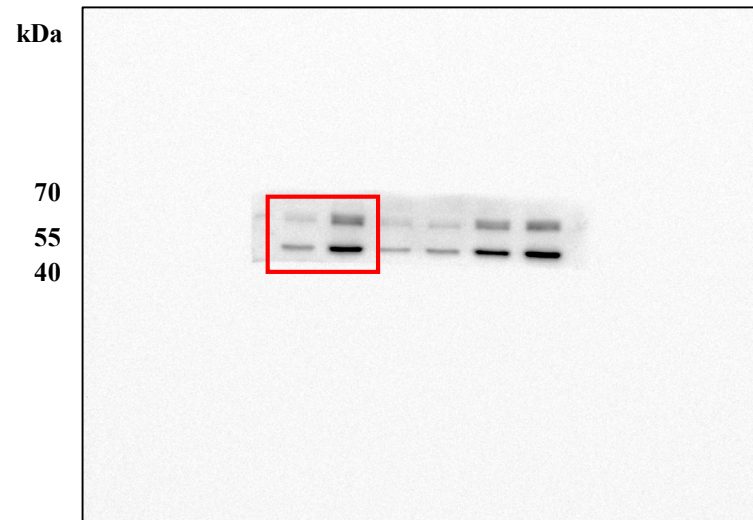

**Anti-p- JNK(Thr183 / Tyr185)**

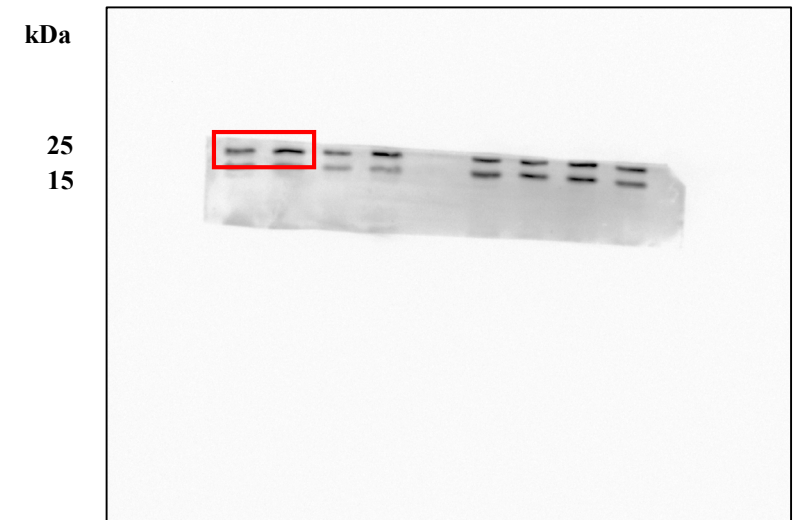

**Anti-BAX**

kDa

35

25

15

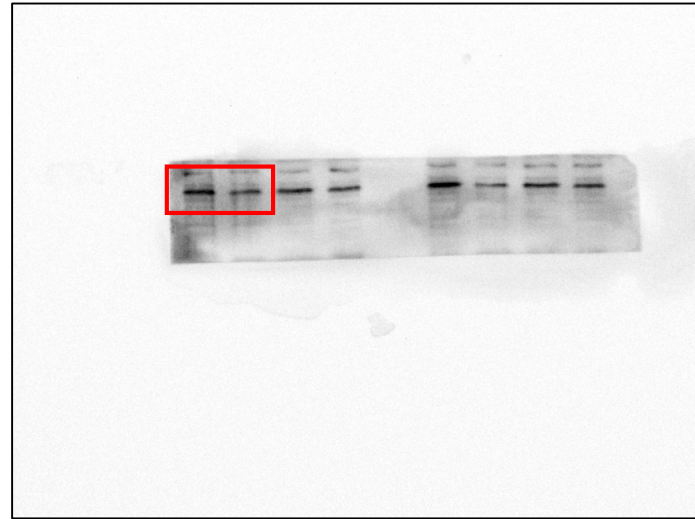

Anti-BCL-2

kDa

40

35

25

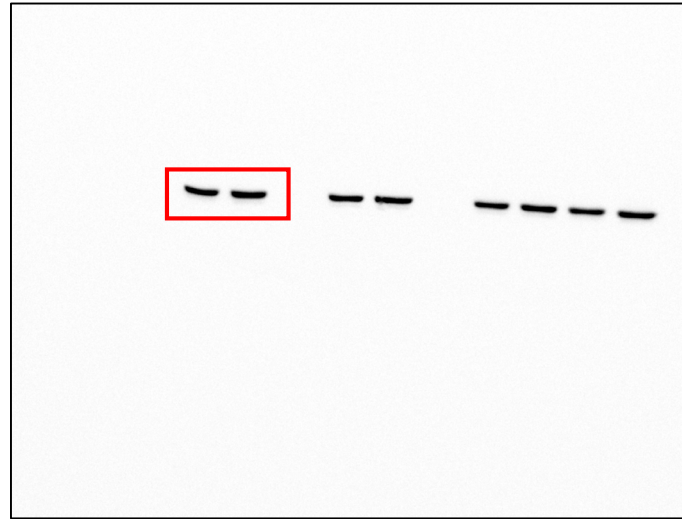

Anti-GAPDH

**J. Full unedited blots for Fig.5g HCT116(si#2)**

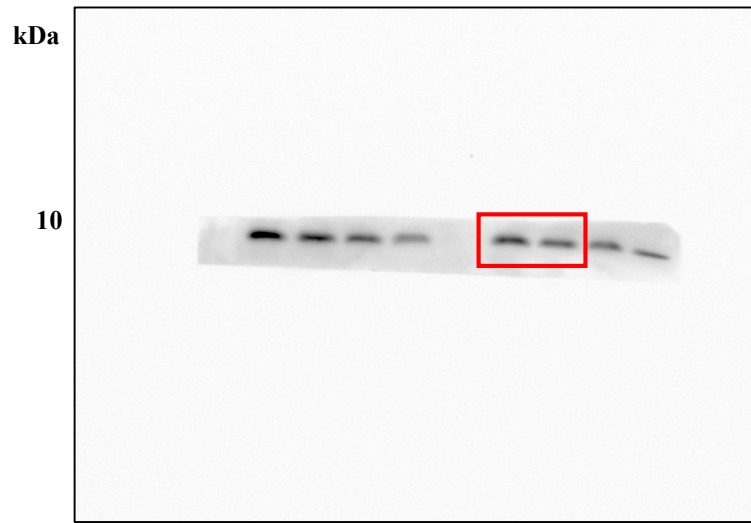

**Anti-SRP9**

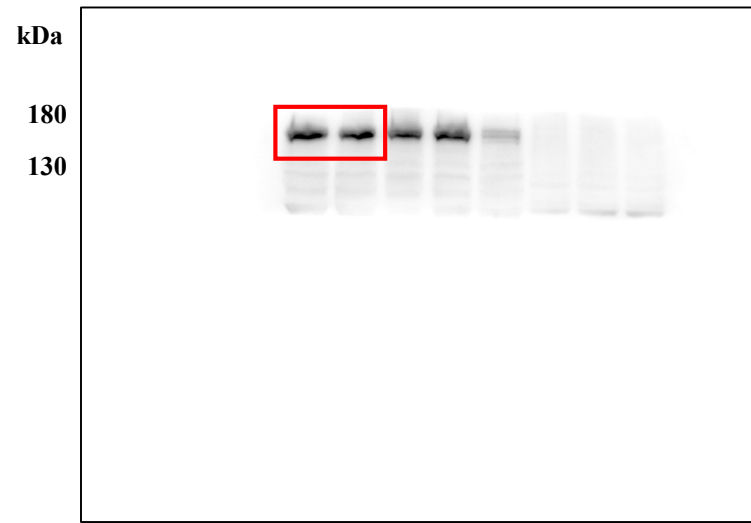

**Anti-T-ASK1**

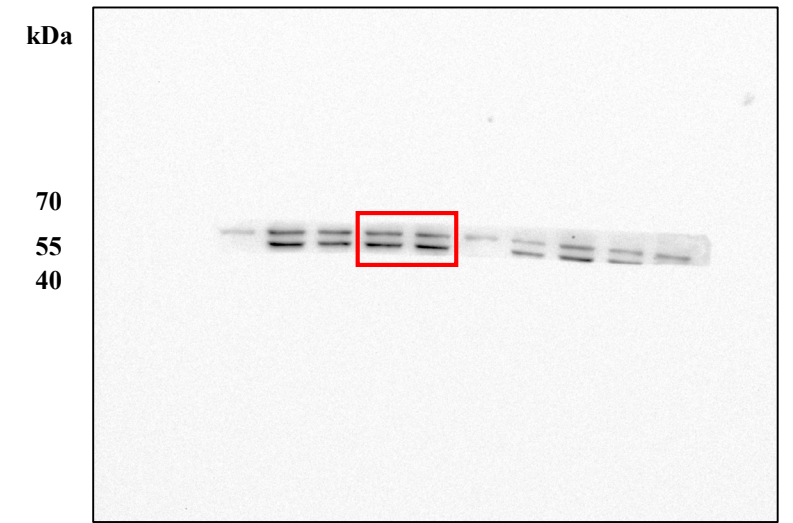

**Anti-T- JNK**

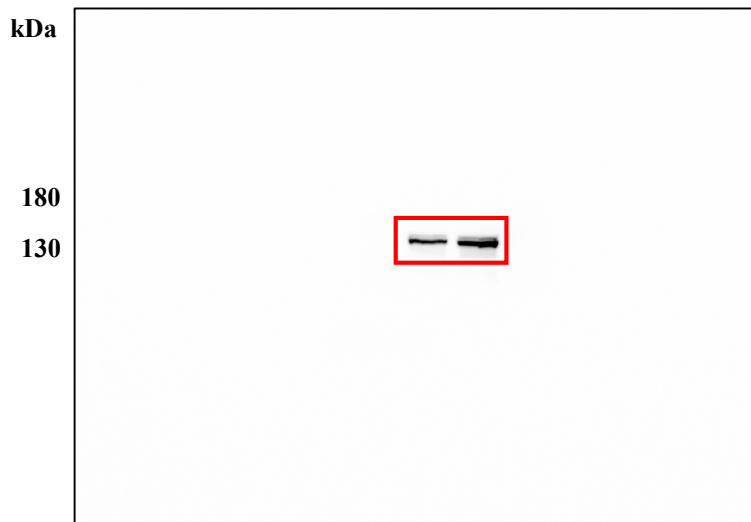

**Anti-p-ASK1(Thr845)**

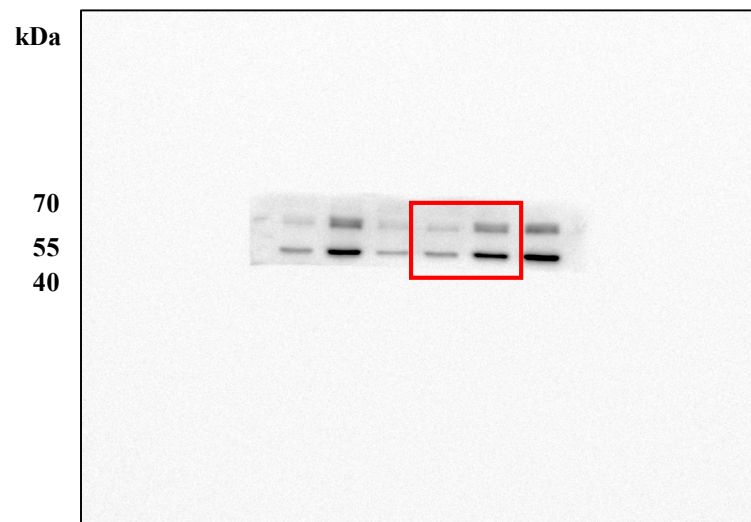

**Anti-p- JNK(Thr183 / Tyr185)**

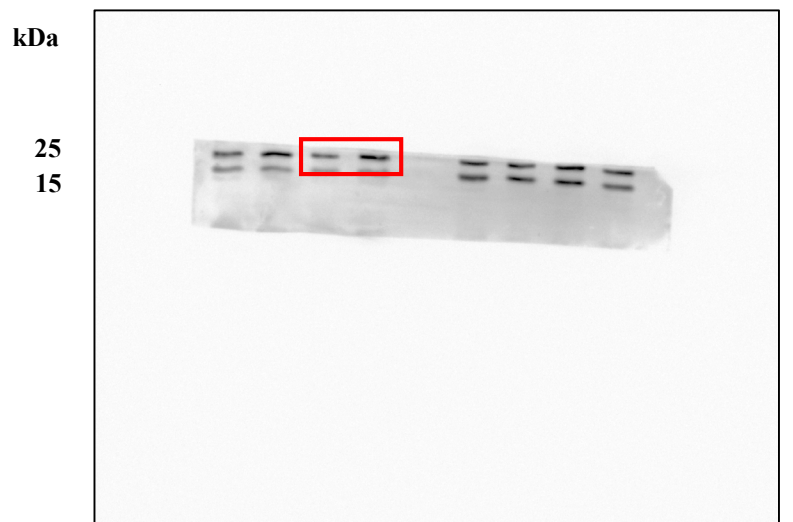

**Anti-BAX**

kDa

35  
25  
15

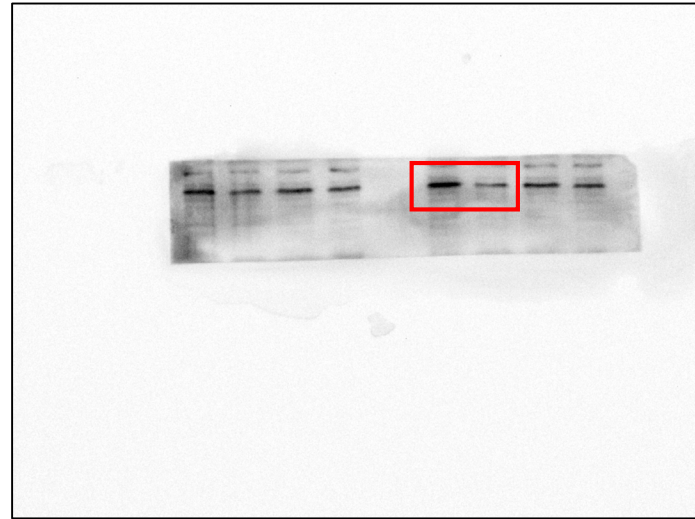

Anti-BCL-2

kDa

40  
35  
25

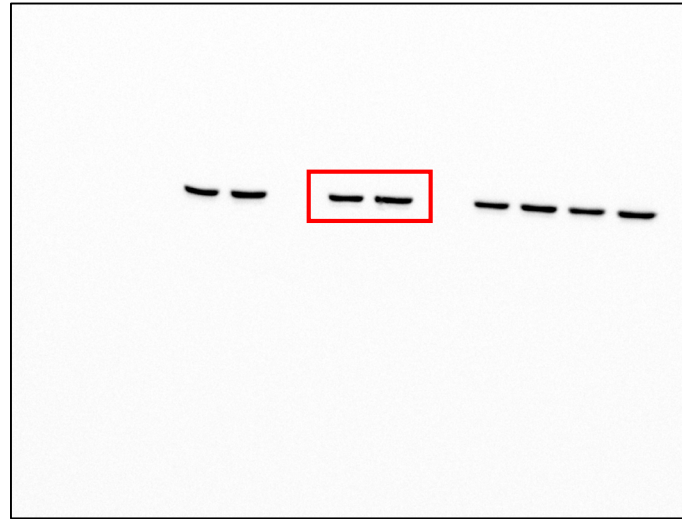

Anti-GAPDH

Sup J. Full unedited blots for Fig.5g (si#2)

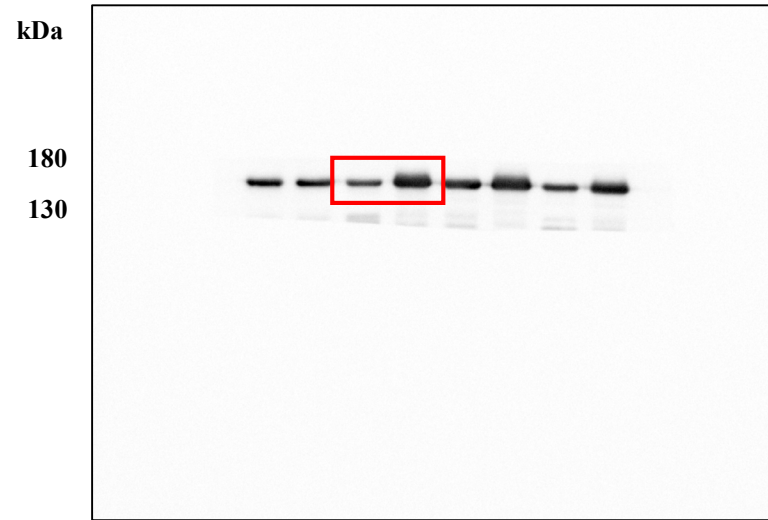

HCT116 Anti-p-ASK1(Thr845)

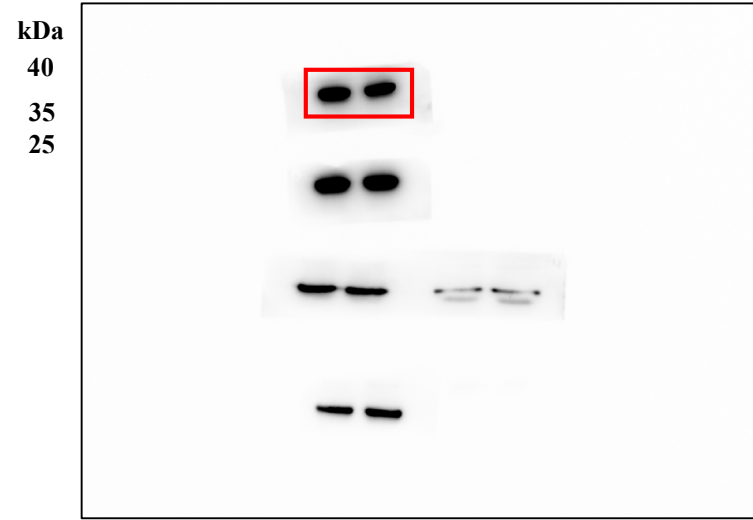

HT29 Anti-GAPDH

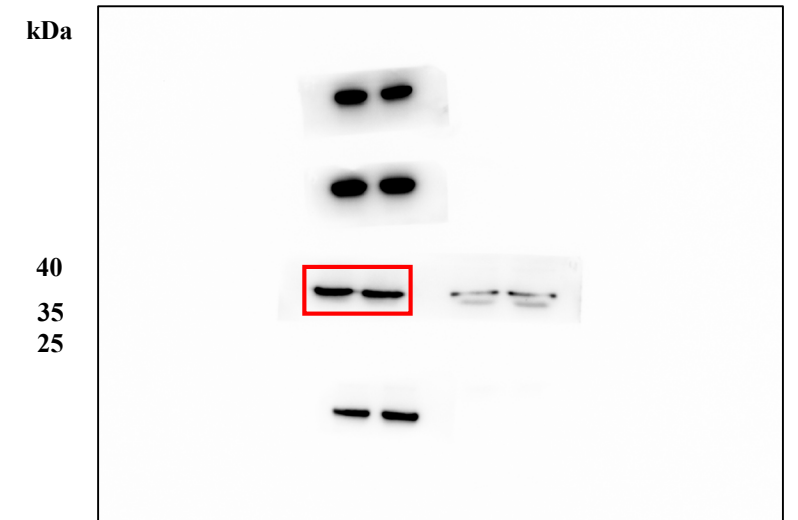

HCT116 Anti-GAPDH

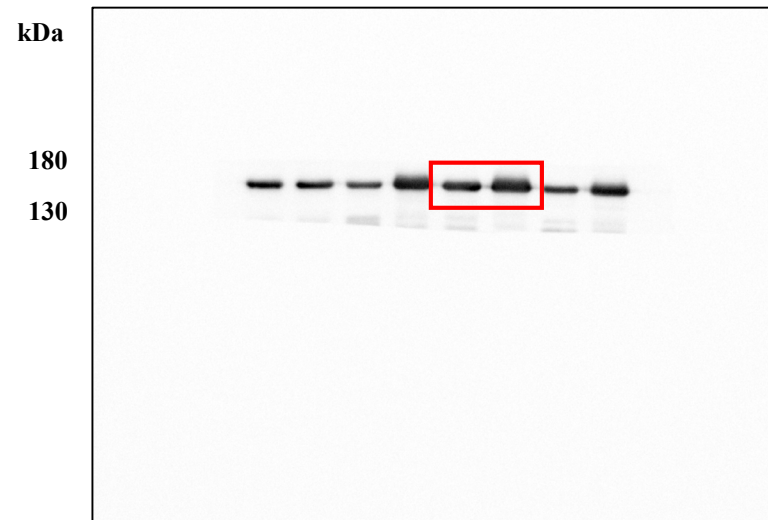

HCT116 Anti-p-ASK1(Thr845)

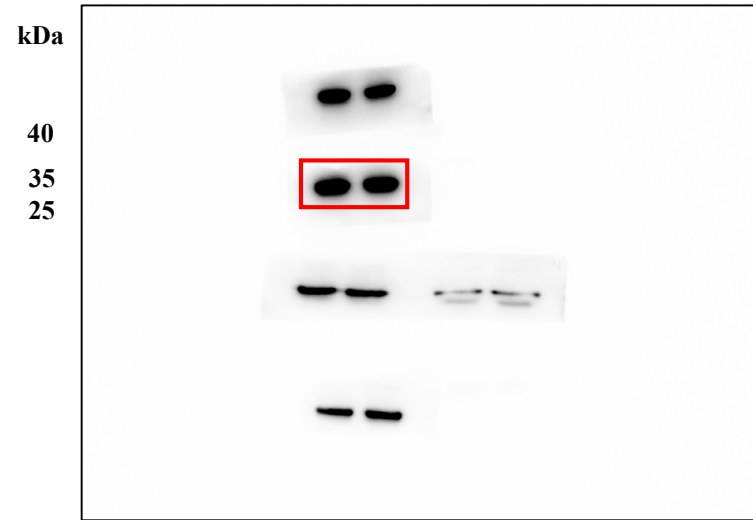

HT29 Anti-GAPDH

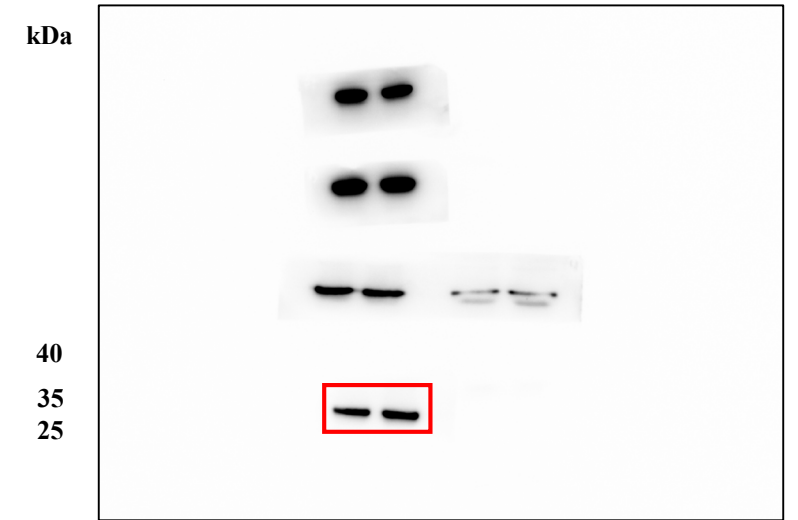

HCT116 Anti-GAPDH



**K. Full unedited blots for Fig.5h HT29**

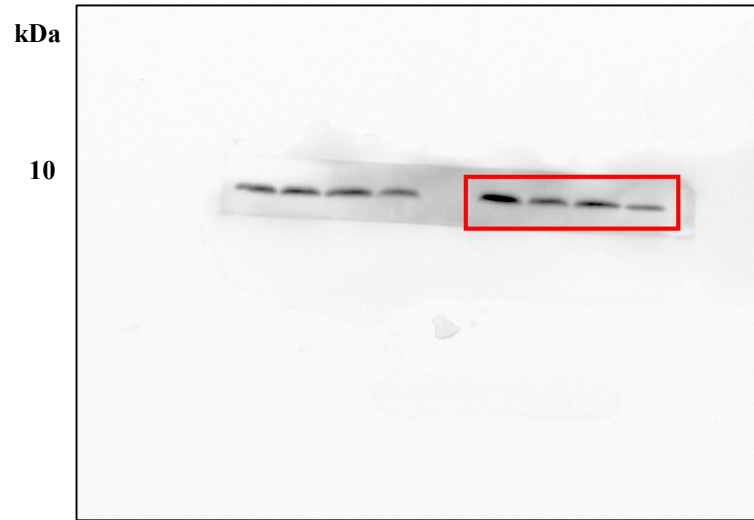

**Anti-SRP9**

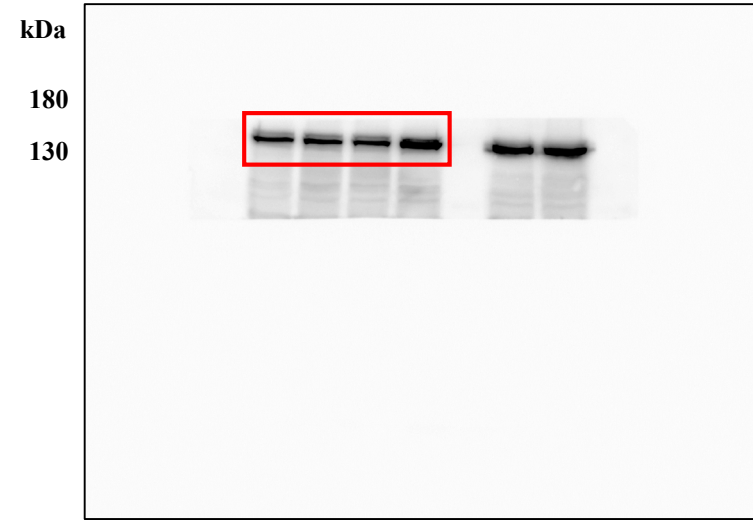

**Anti-T-ASK1**

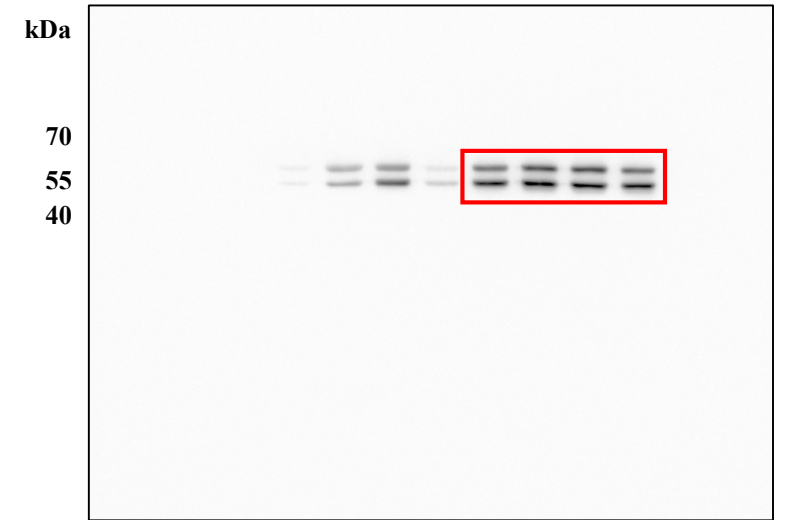

**Anti-T- JNK**

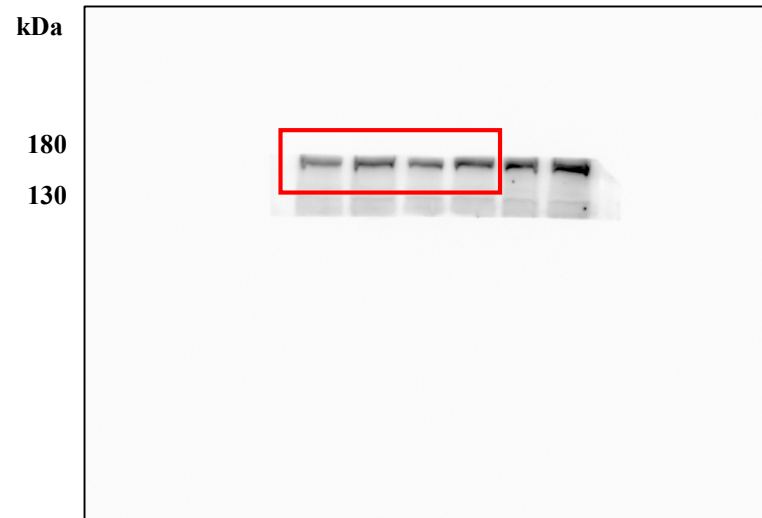

**Anti-p-ASK1(Thr845)**

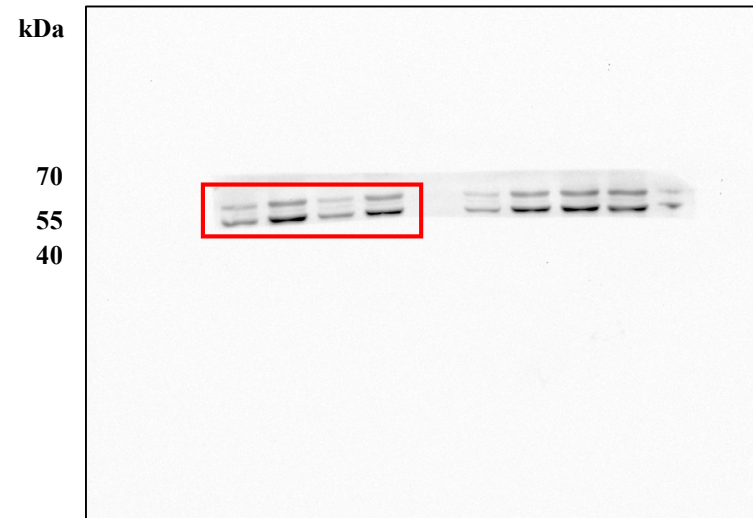

**Anti-p- JNK(Thr183 / Tyr185)**

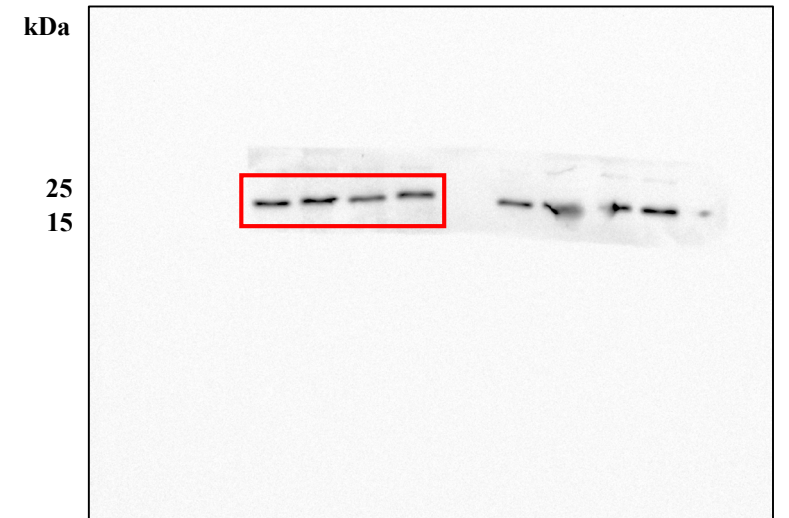

**Anti-BAX**

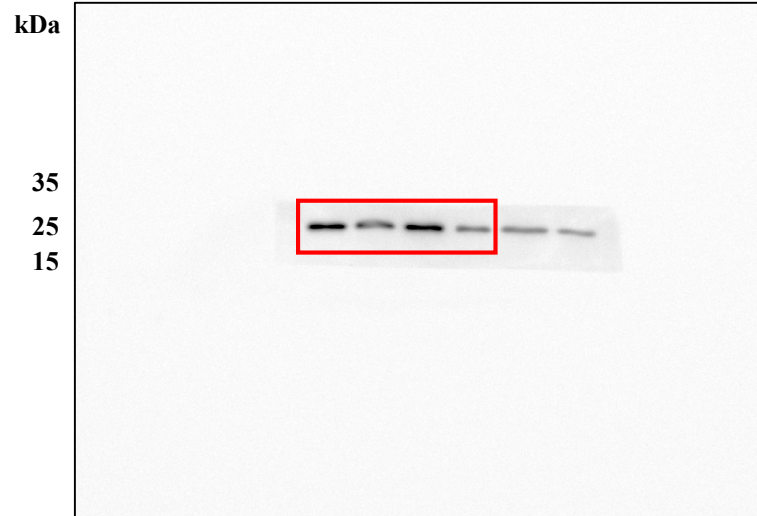

Anti-BCL-2

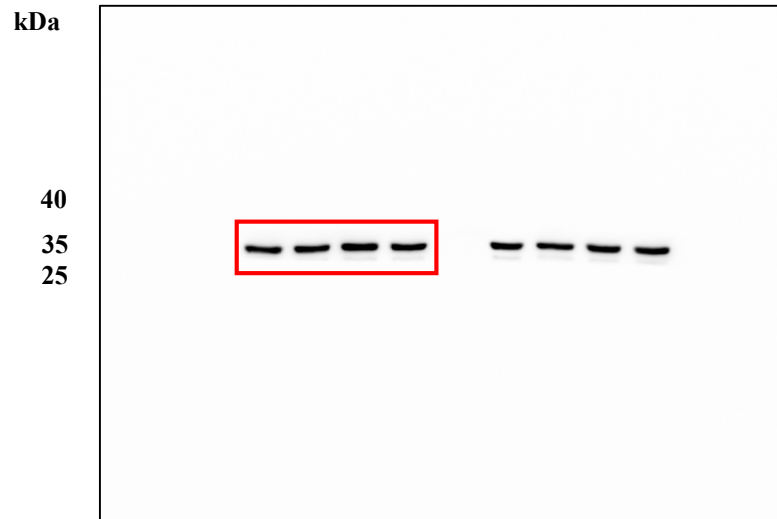

Anti-GAPDH

**K. Full unedited blots for Fig.5h HCT116**

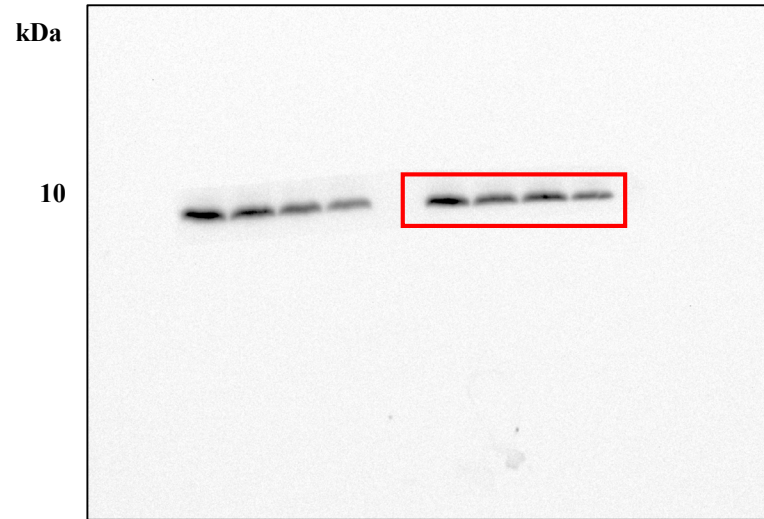

**Anti-SRP9**

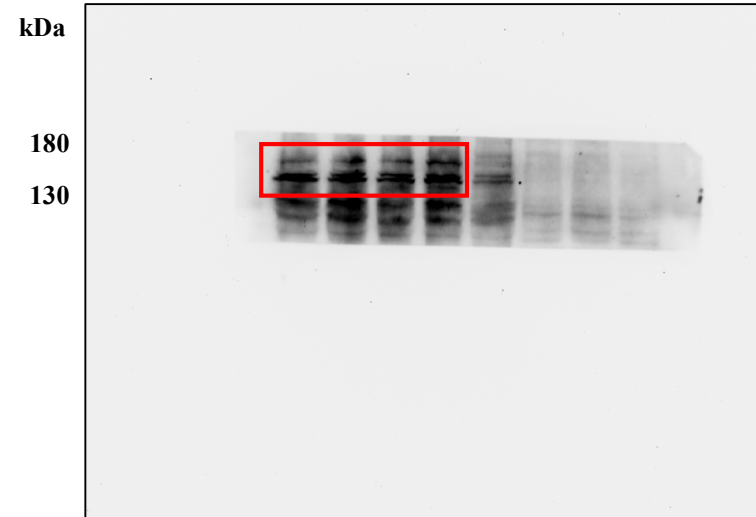

**Anti-T-ASK1**

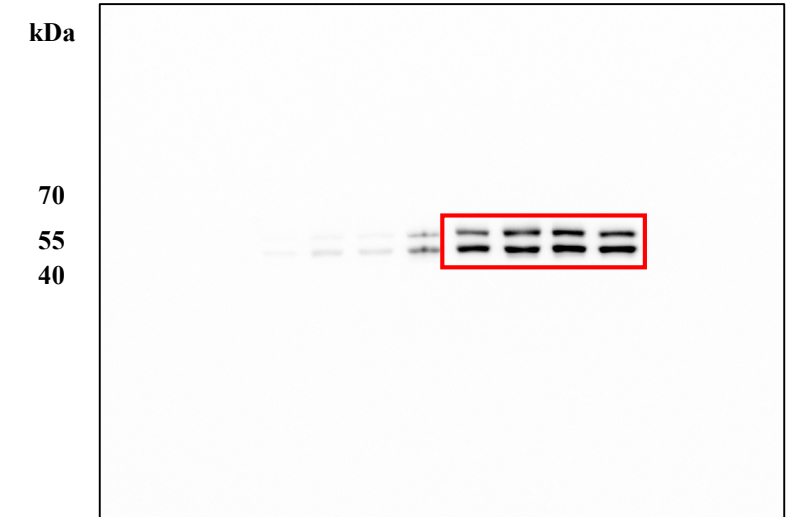

**Anti-T- JNK**

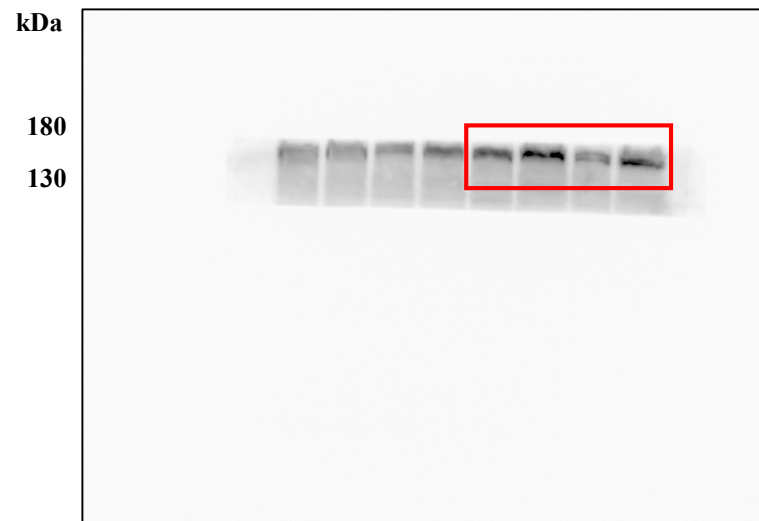

**Anti-p-ASK1(Thr845)**

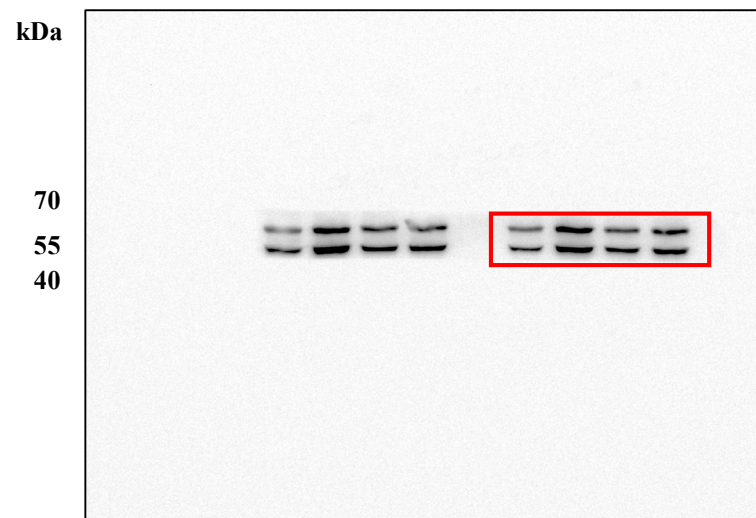

**Anti-p- JNK(Thr183 / Tyr185)**

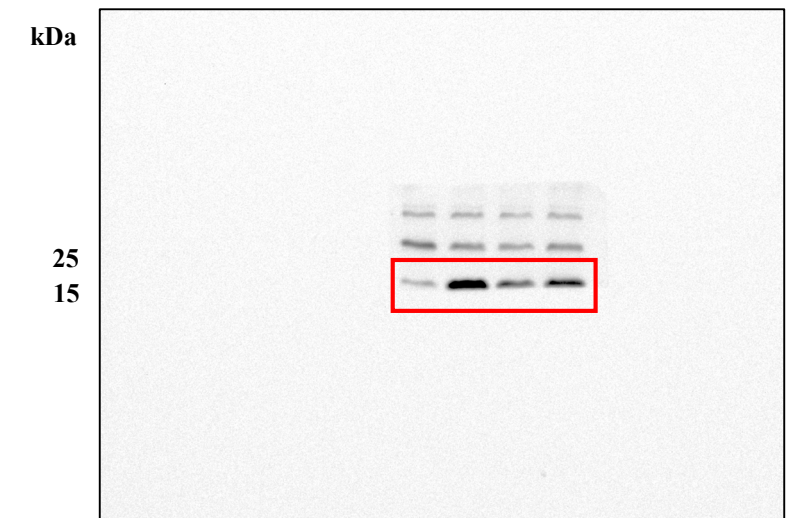

**Anti-BAX**

kDa

35

25

15

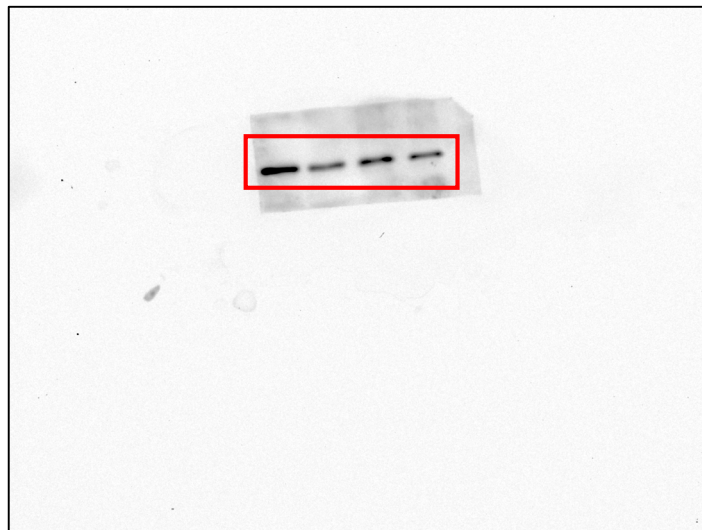

Anti-BCL-2

kDa

40

35

25

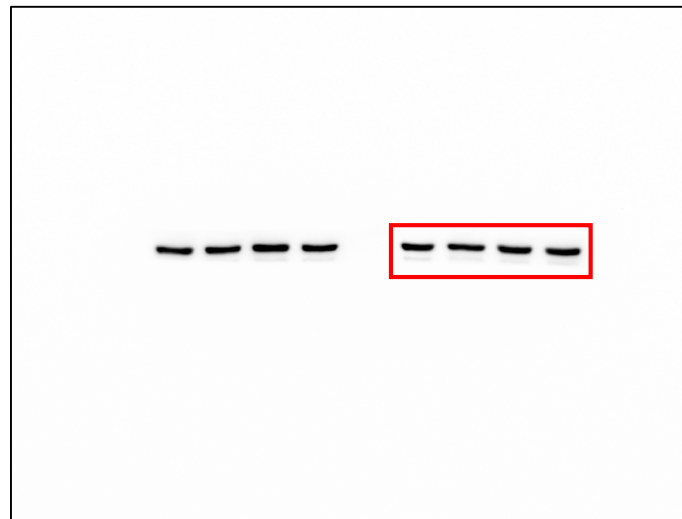

Anti-GAPDH

**Sup K. Full unedited blots for Fig.5h**

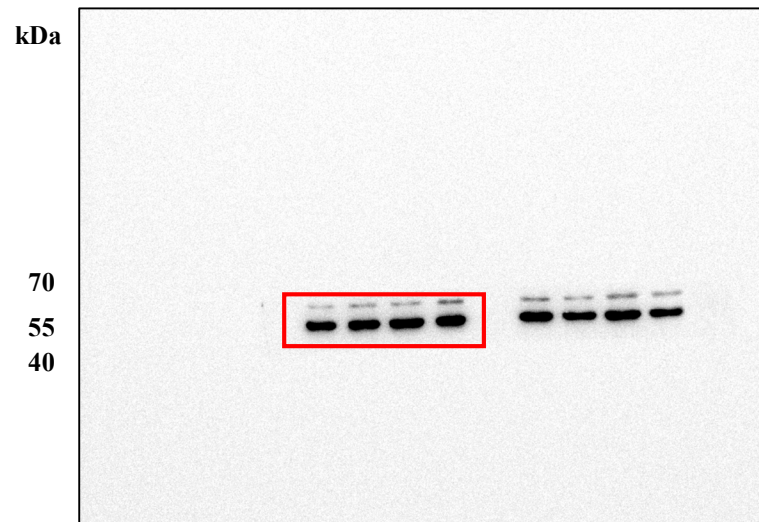

**HT29 Anti-T-JNK**

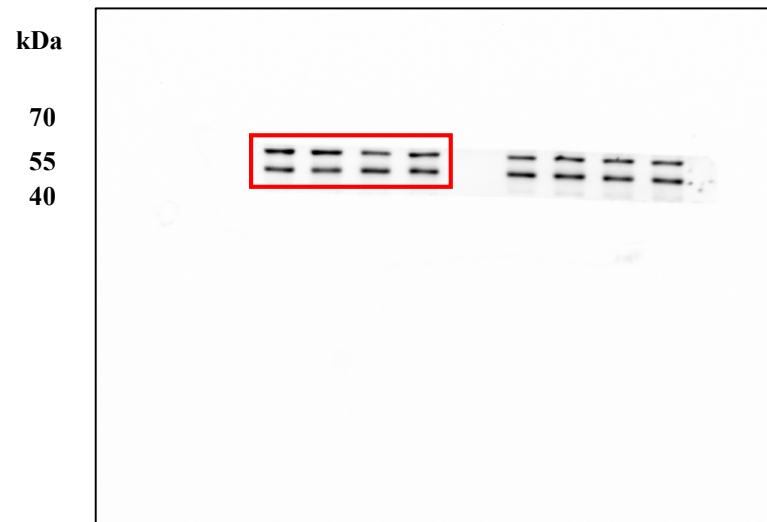

**HCT116 Anti-T-JNK**

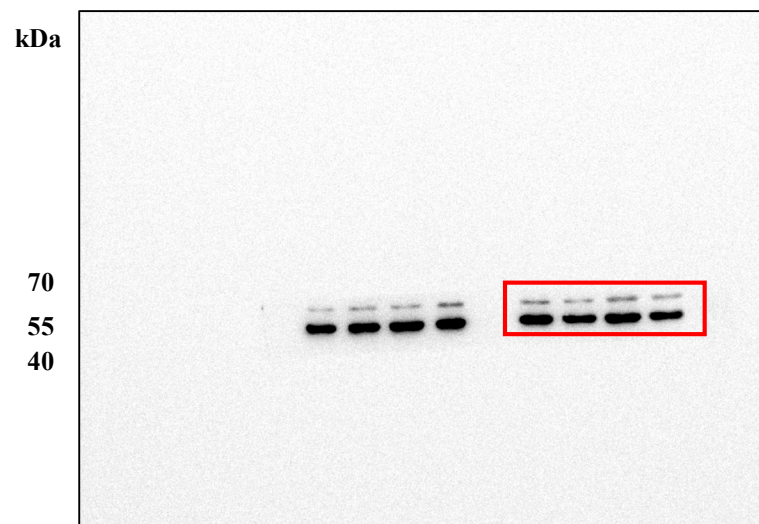

**HT29 Anti-T-JNK**

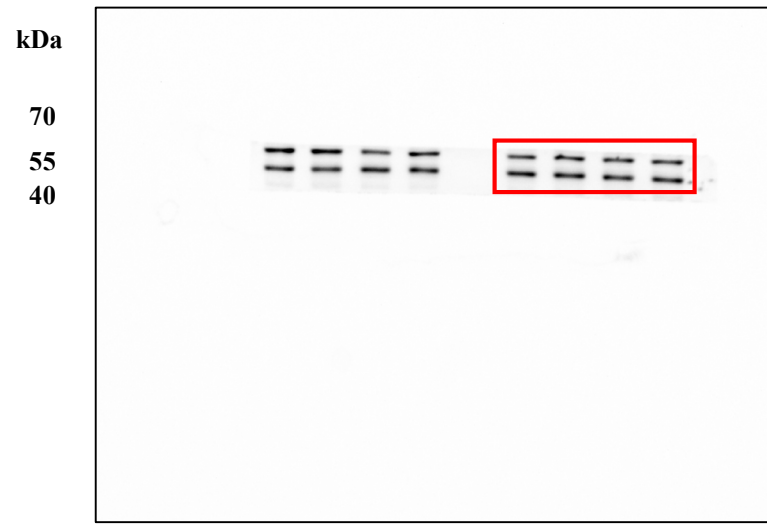

**HCT116 Anti-T-JNK**

**Sup K. Full unedited blots for Fig.5h**

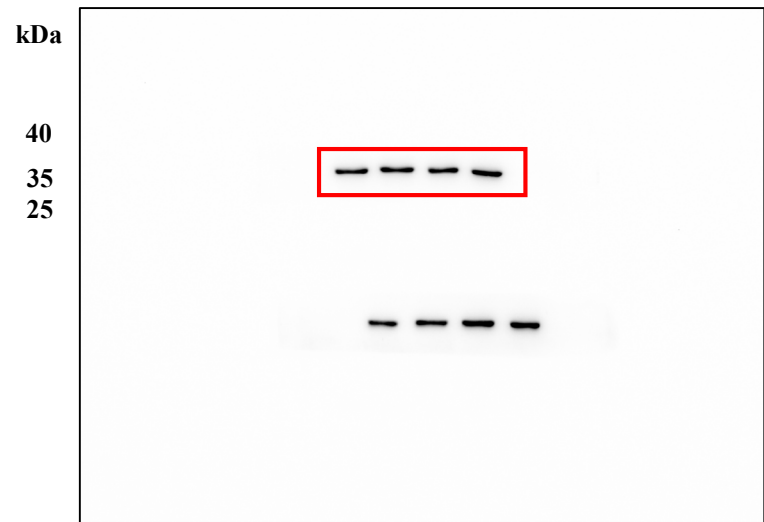

**HT29 Anti-GAPDH**

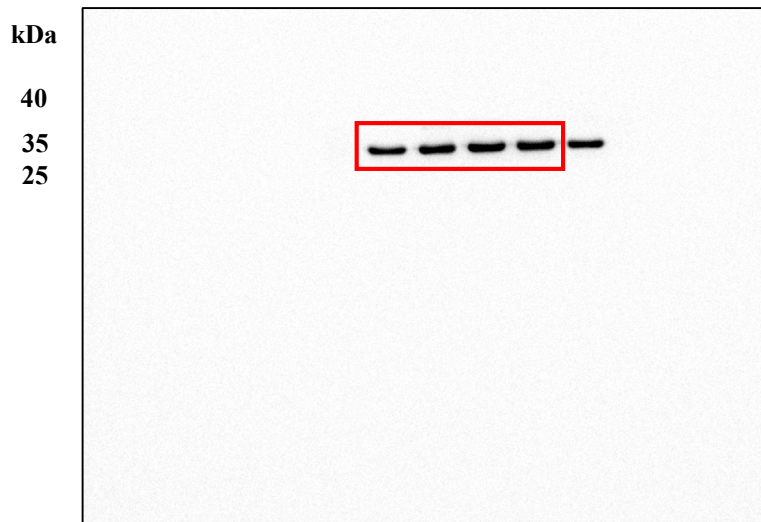

**HCT116 Anti-GAPDH**

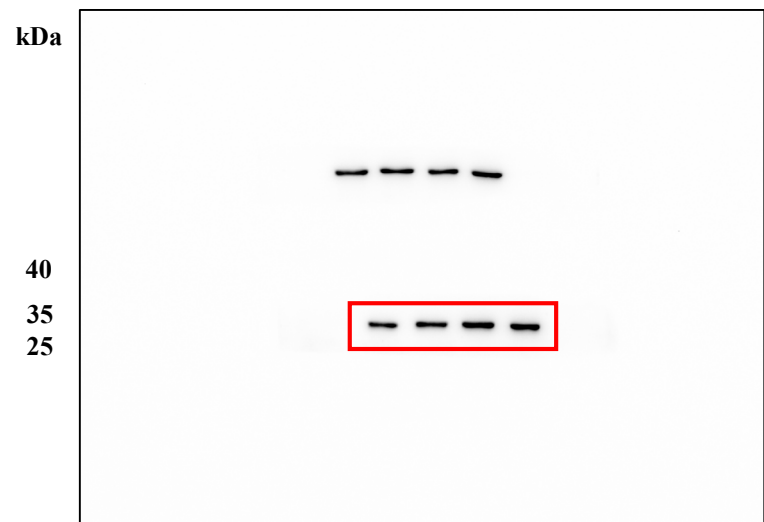

**HT29 Anti-GAPDH**

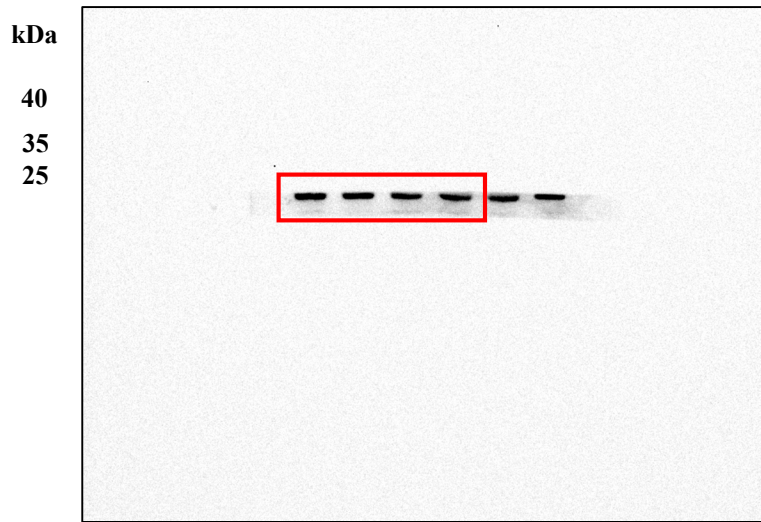

**HCT116 Anti-GAPDH**

**L. Full unedited blots for Fig.6d**

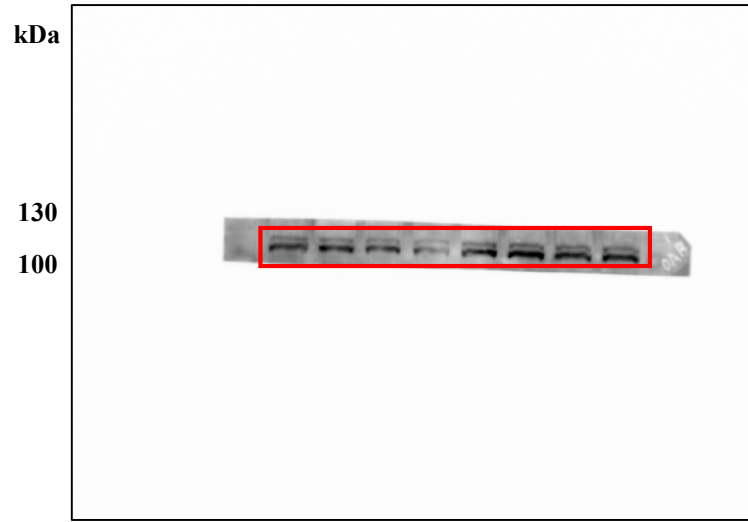

**Anti-DAB2IP**

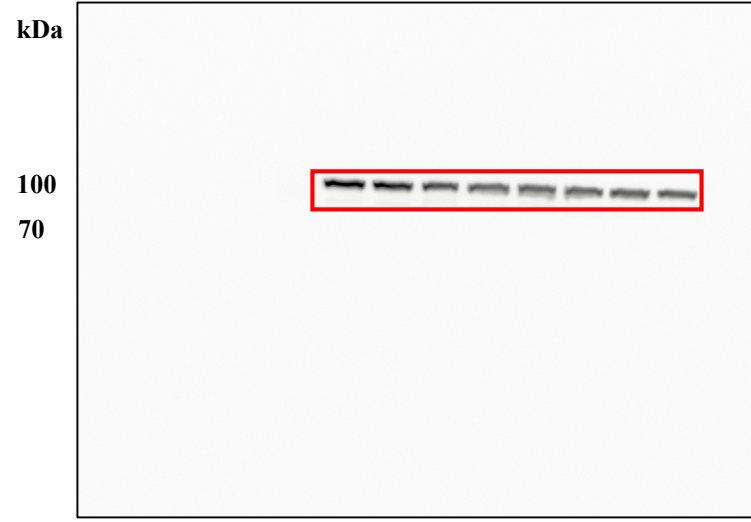

**Anti-HSP90AA1**

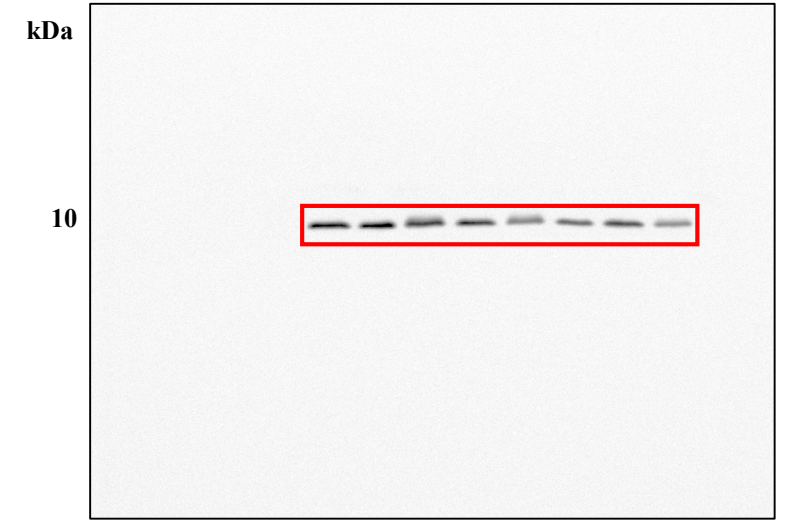

**Anti-SRP9**

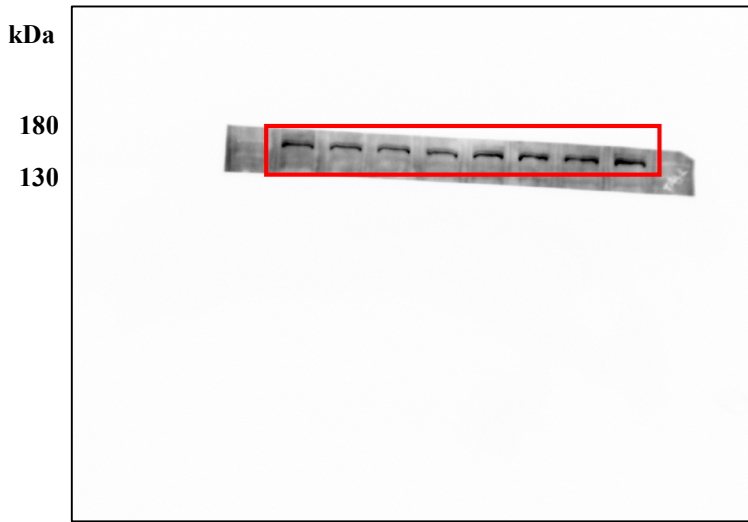

**Anti-p-ASK1(Thr845)**

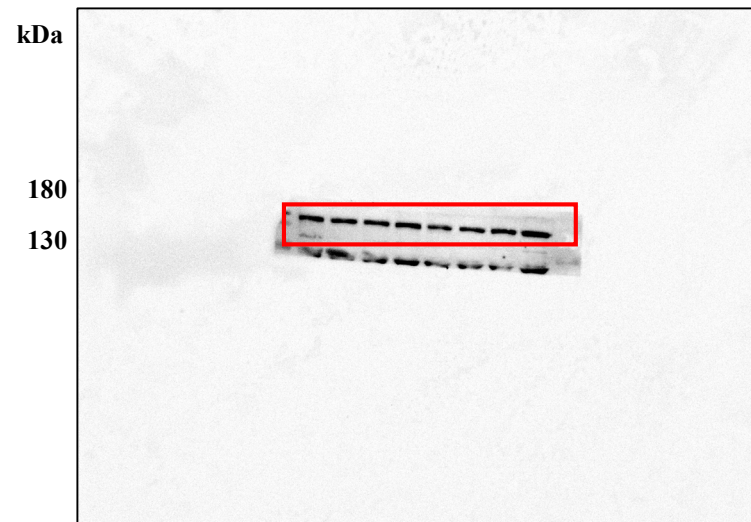

**Anti-T-ASK1**

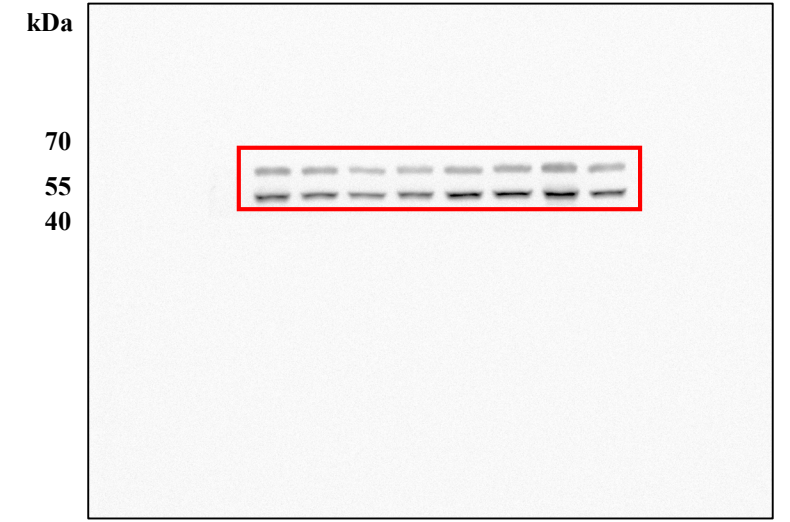

**Anti-p- JNK(Thr183 / Tyr185)**

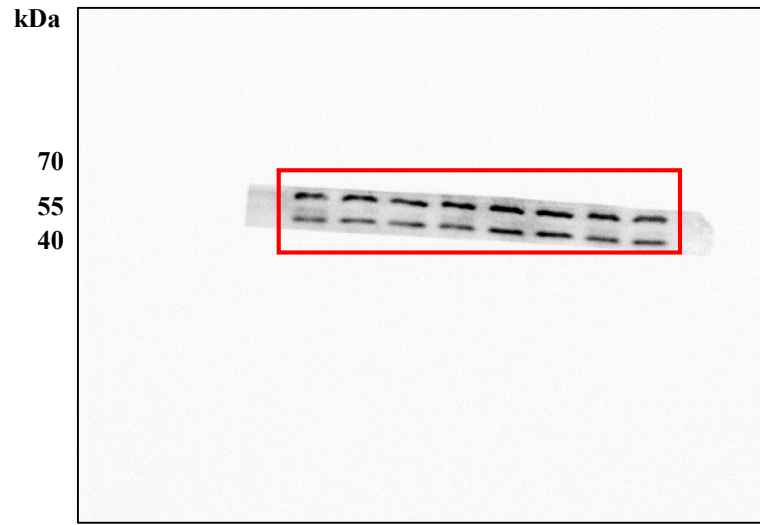

Anti-T- JNK

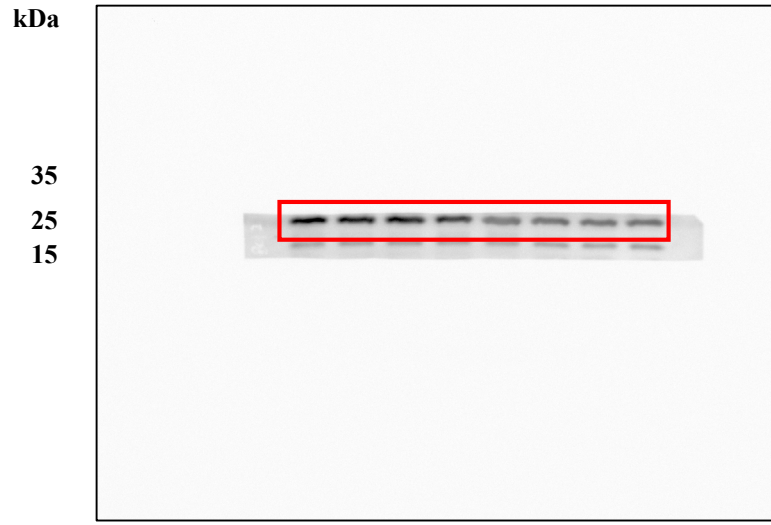

Anti-BCL-2

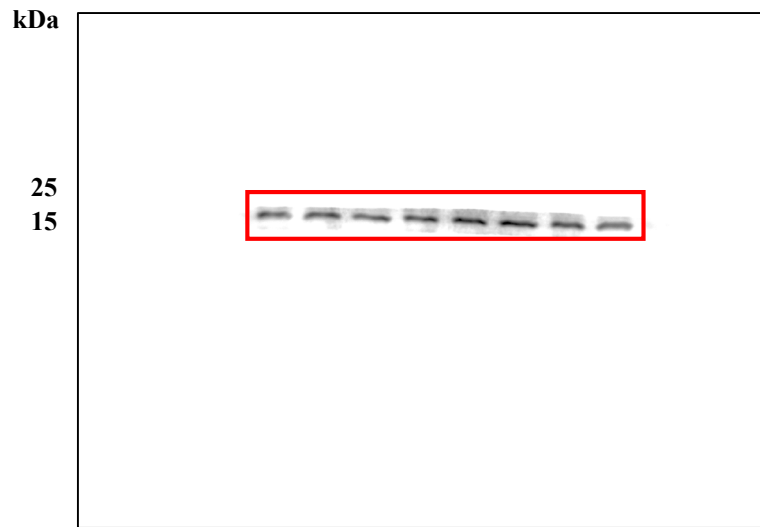

Anti-BAX

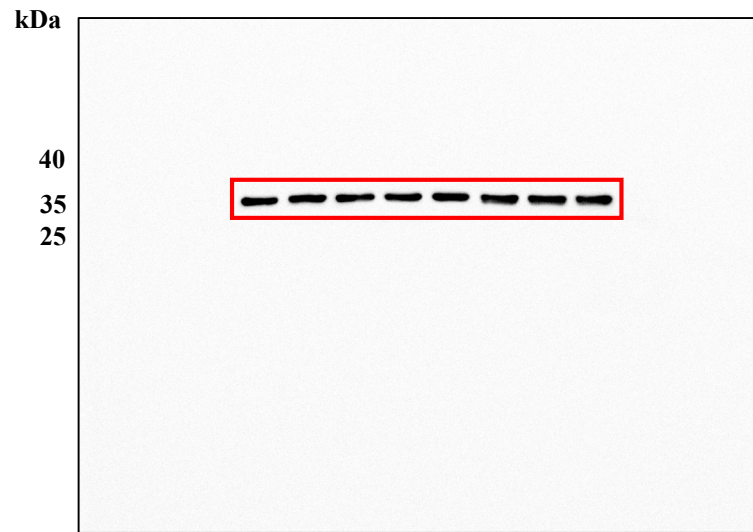

Anti-GAPDH



**M. Full unedited blots for Fig.S2**

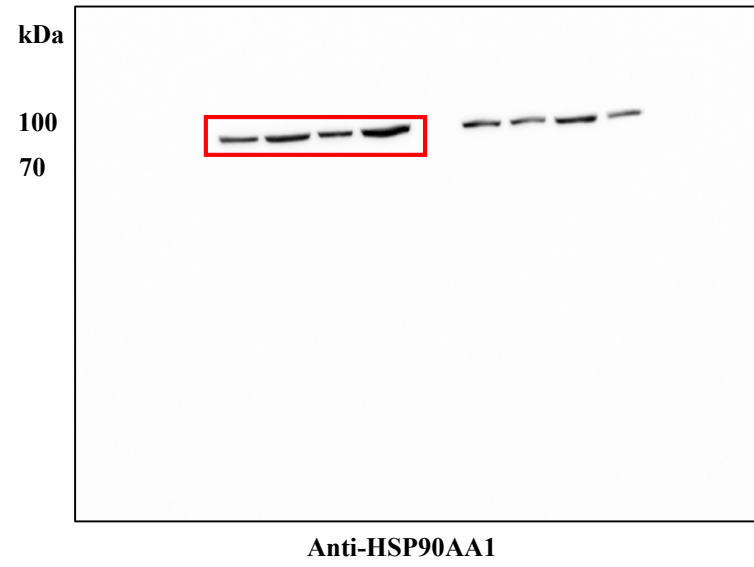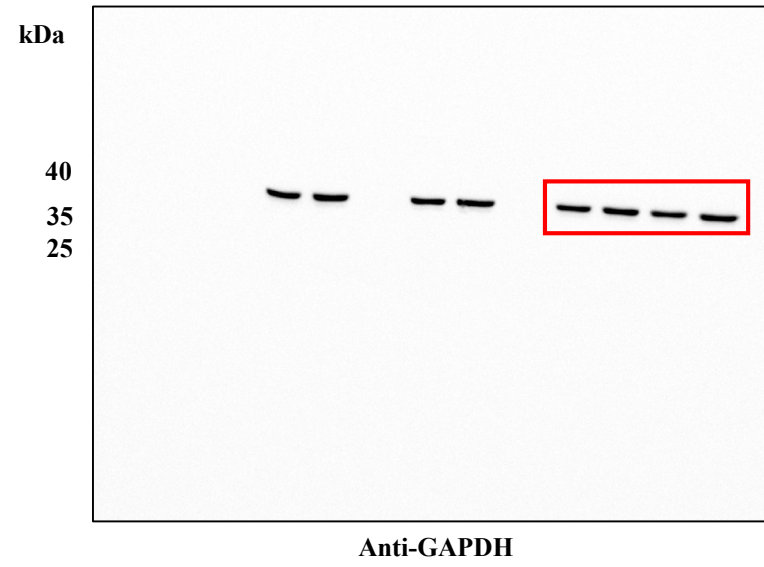

Sup M. Full unedited blots for Fig.S2

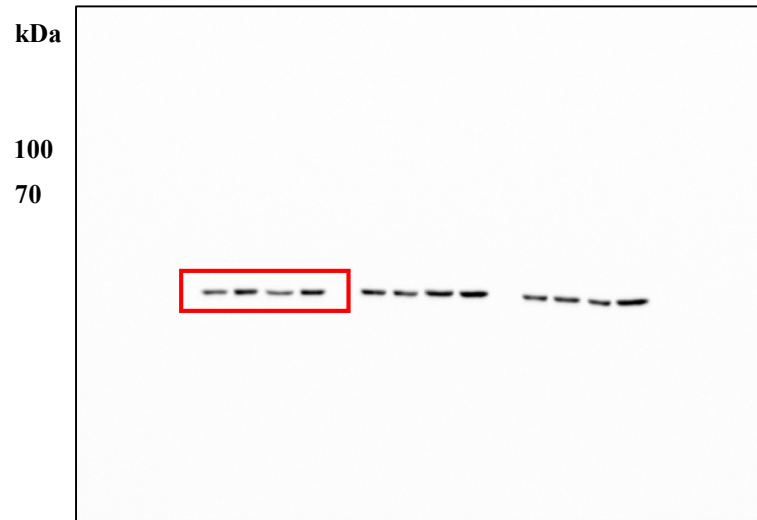

Anti-HSP90AA1

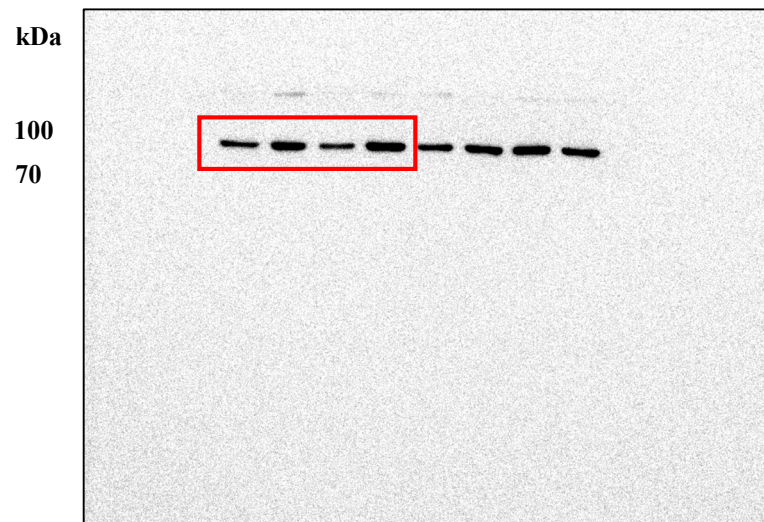

Anti-HSP90AA1

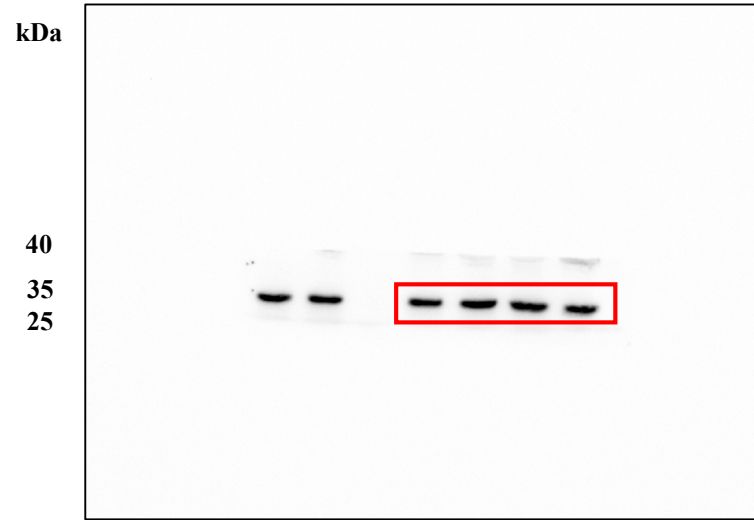

Anti-GAPDH

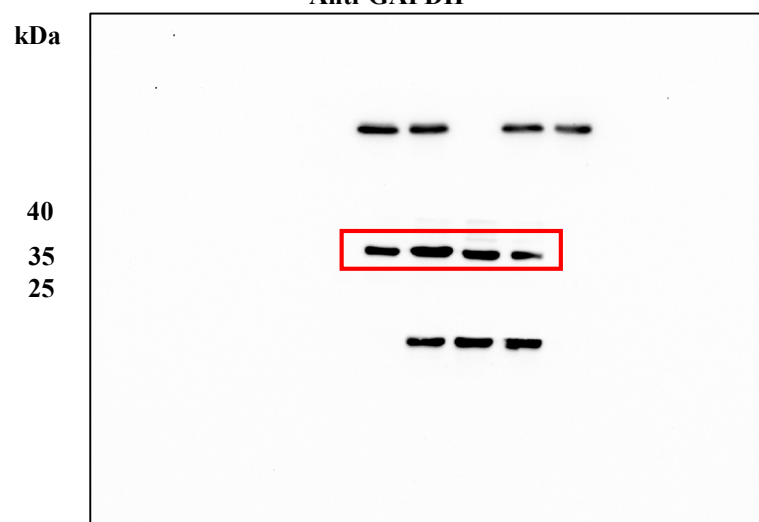

Anti-GAPDH

**N. Full unedited blots for Fig.S5**

**HT29**

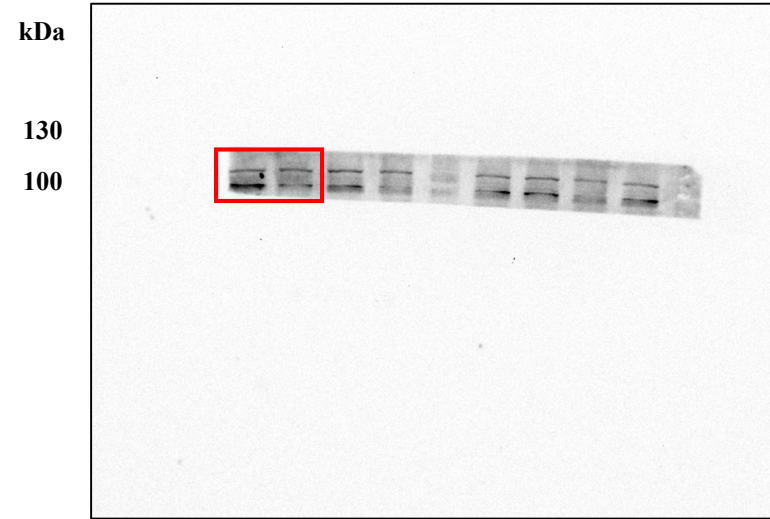

**Anti-DAB2IP**

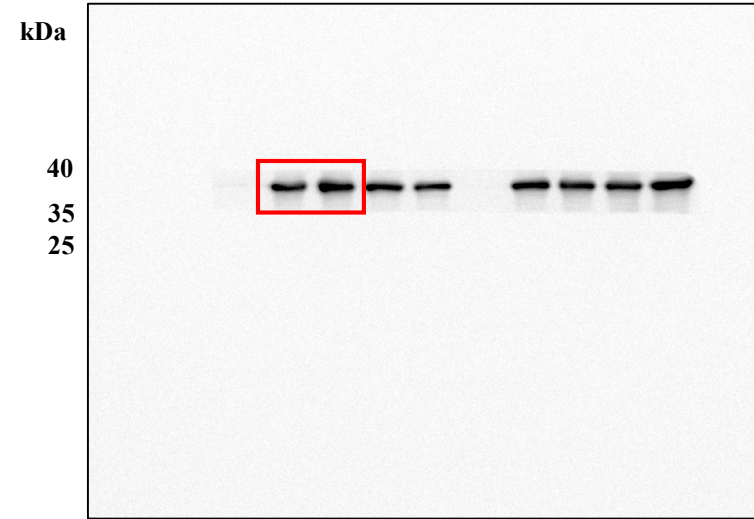

**Anti-GAPDH**

**HCT116**

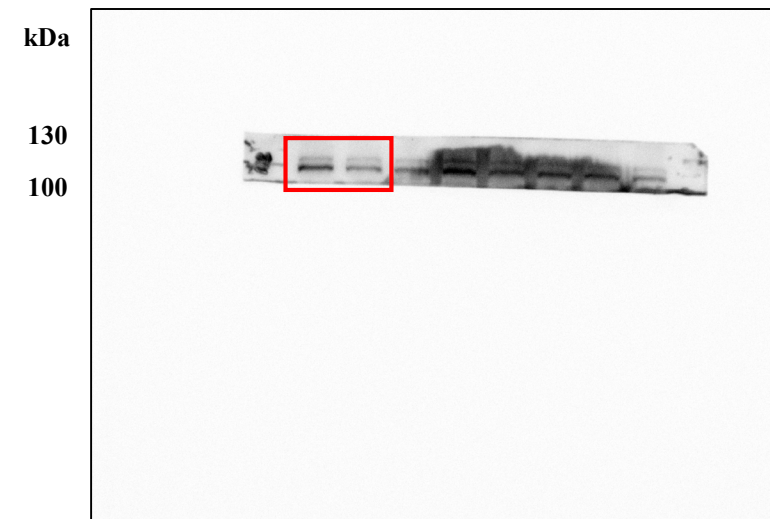

**Anti-DAB2IP**

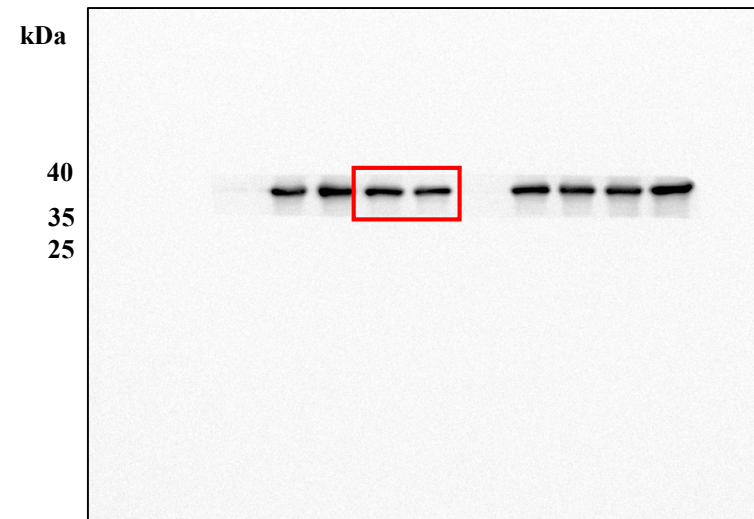

**Anti-GAPDH**

**HT29**

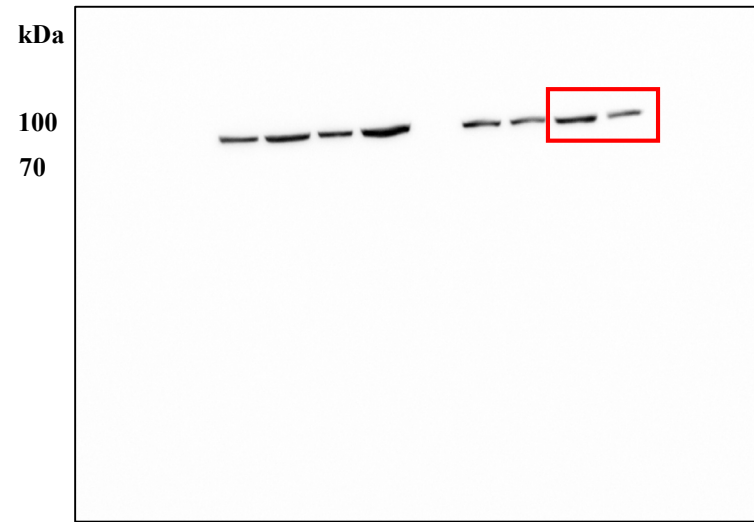

**Anti-HSP90AA1**

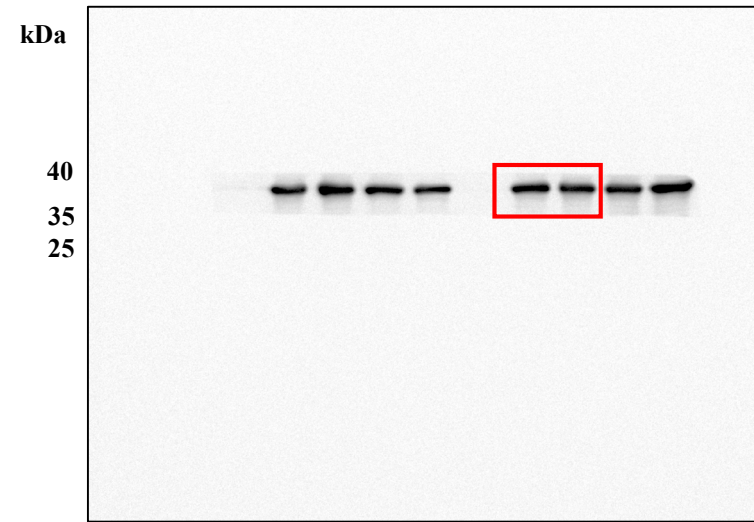

**Anti-GAPDH**

**HCT116**

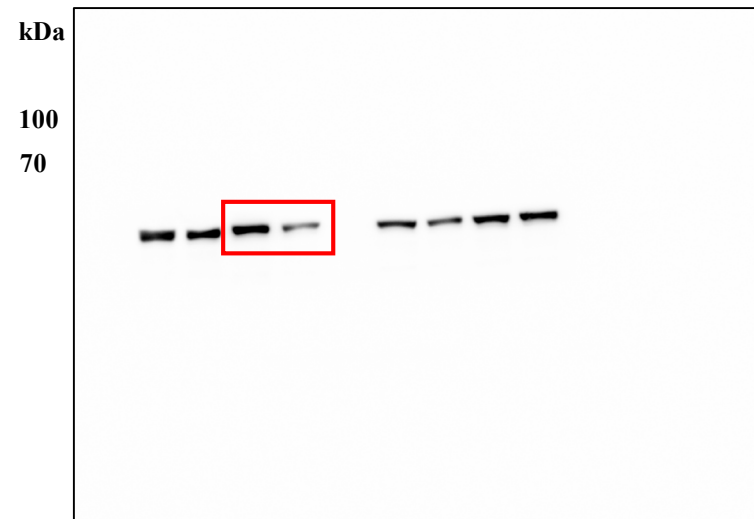

**Anti-HSP90AA1**

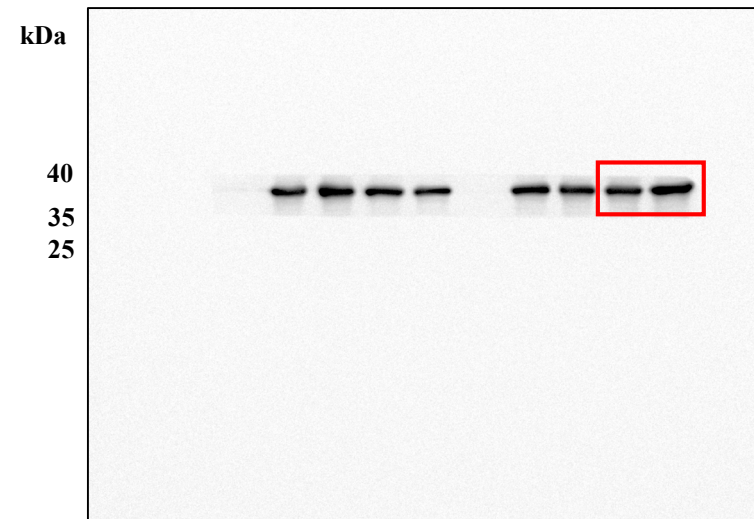

**Anti-GAPDH**

**HT29**

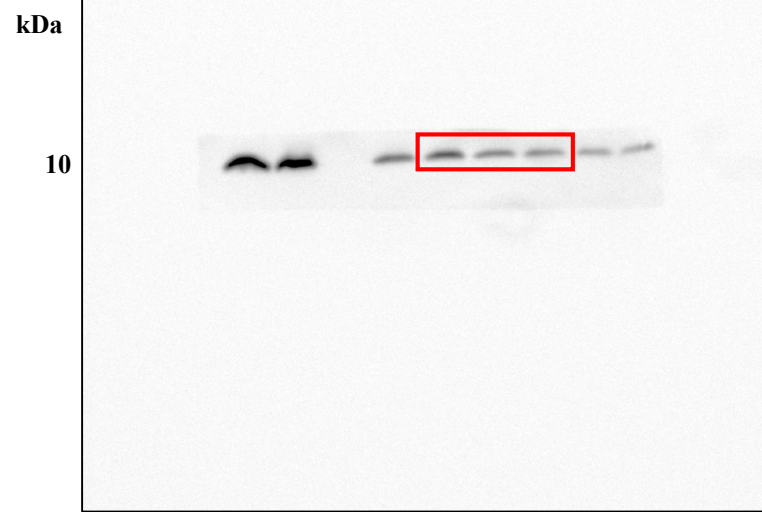

**Anti-SRP9**

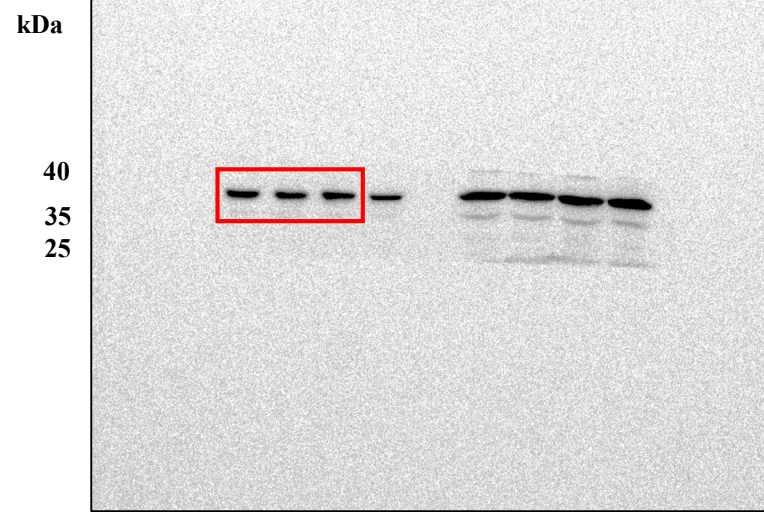

**Anti-GAPDH**

**HCT116**

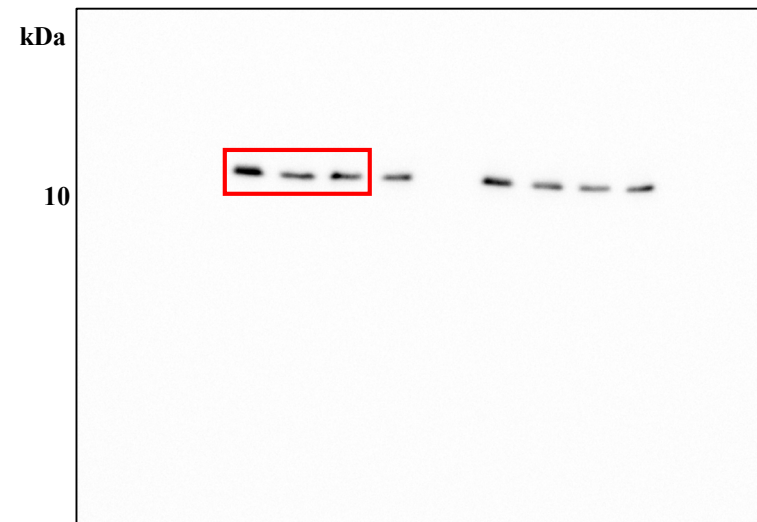

**Anti-SRP9**

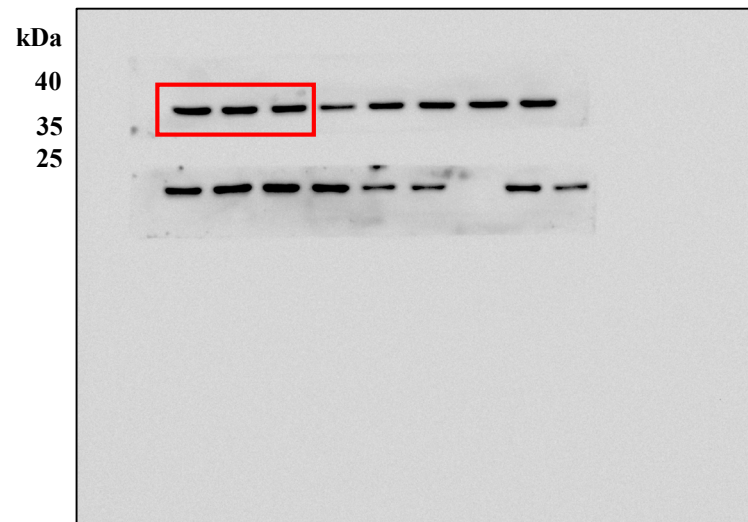

**Anti-GAPDH**

Sup N. Full unedited blots for Fig.S5

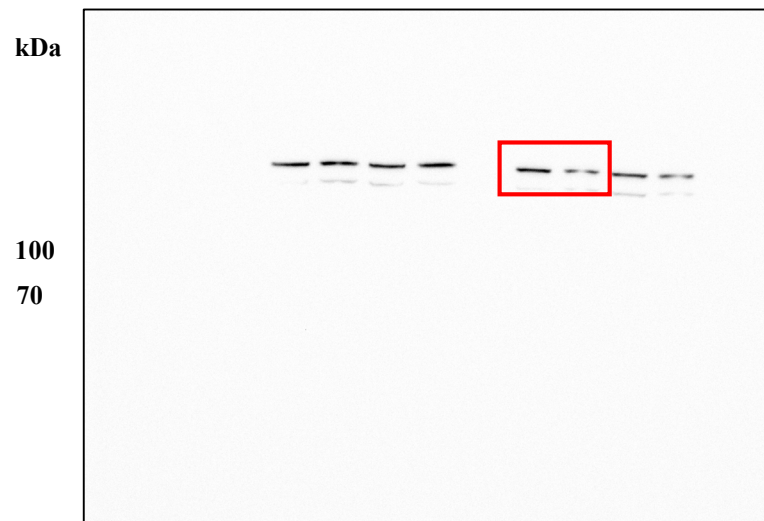

HT29 Anti-HSP90AA1

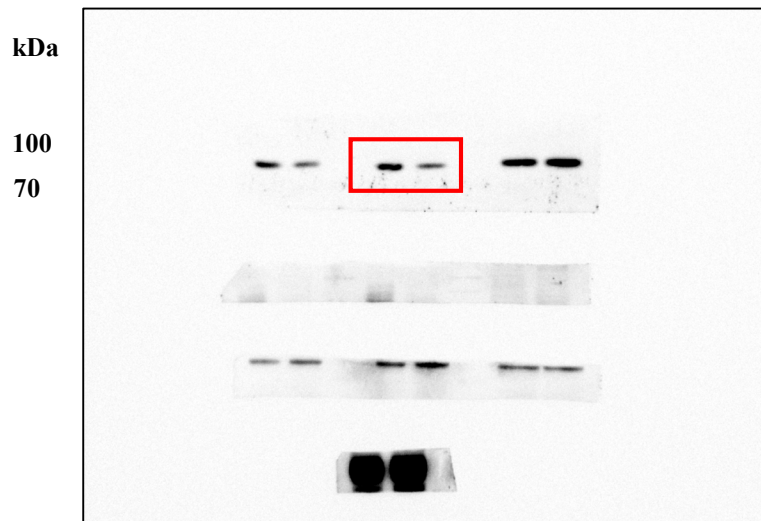

HCT116 Anti-HSP90AA1

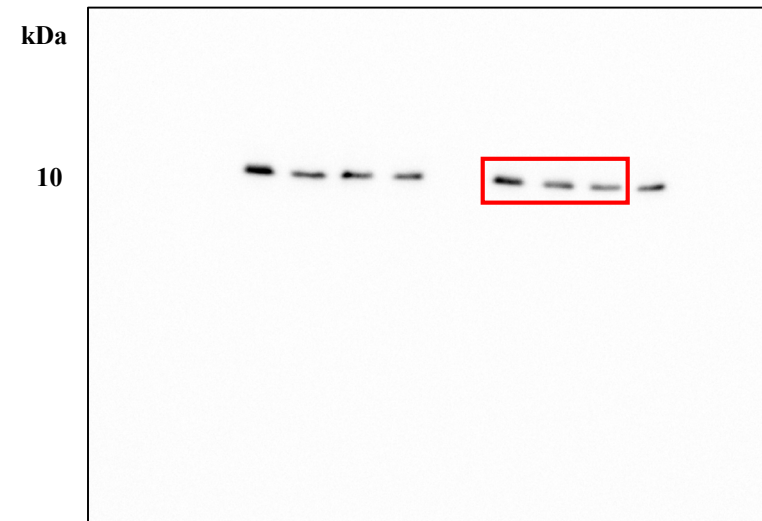

HCT116 Anti-SRP9

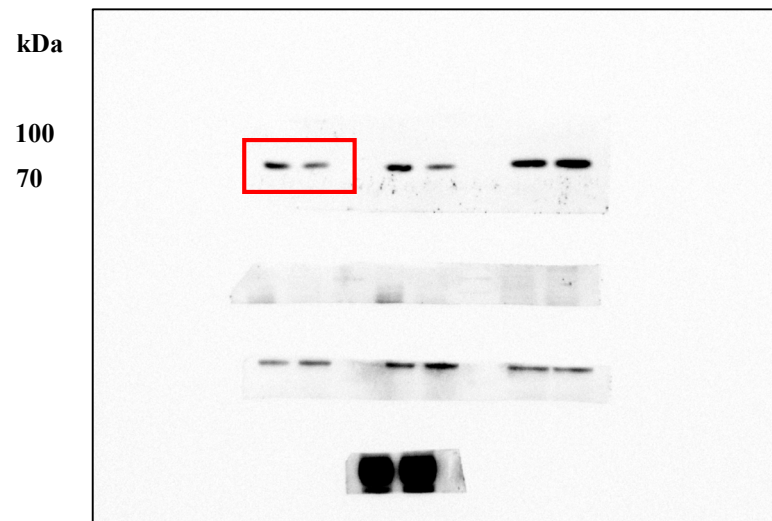

HT29 Anti-HSP90AA1

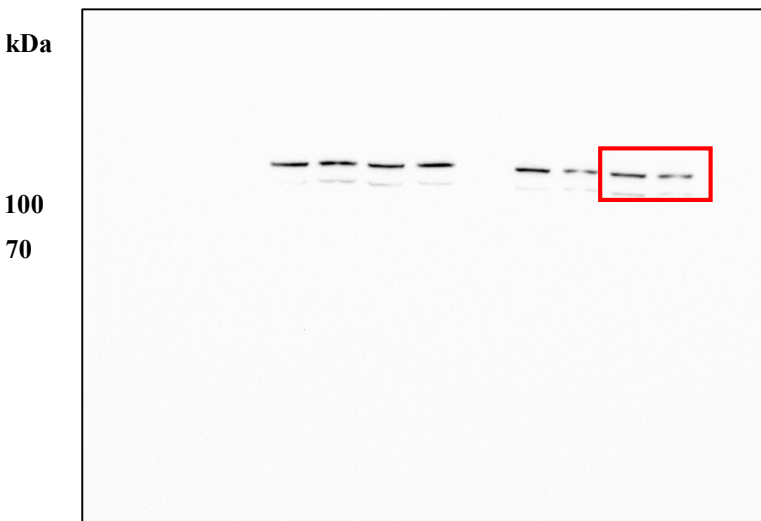

HCT116 Anti-HSP90AA1

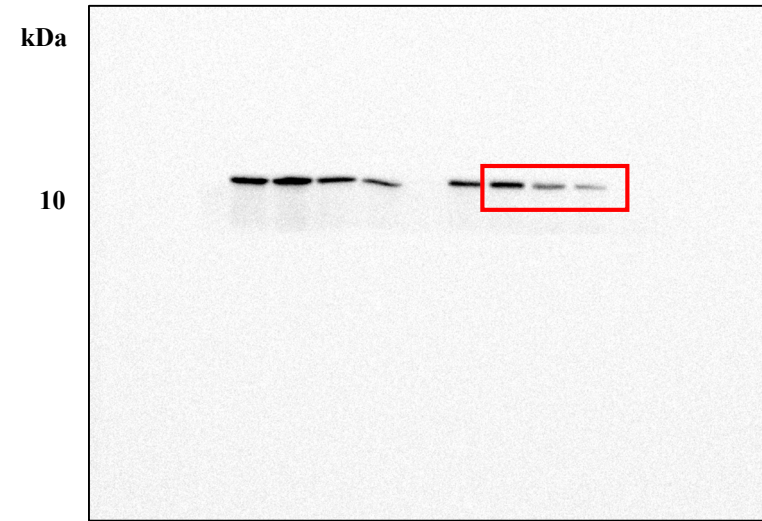

HCT116 Anti-SRP9
